# Supplementary material for: Effect of the substituents of new coumarin-imidazo[1,2-a]heterocyclic-3-acrylate derivatives on nonlinear optical properties: a combined experimental-theoretical approach
Source: Royal Society of Chemistry journal article supplement (doi:10.1039/d1cp03396d), 2021-01-01
Supplement: d1cp03396d1.pdf [file d1cp03396d1.pdf]

## Supporting Information

### Effect of the Substituents of New Coumarin-imidazo[1,2-*a*]heterocyclic-3-acrylate Derivatives on Nonlinear Optical Properties: A combined experimental-theoretical approach

Juan Luis Vázquez,<sup>a</sup> Iván Velazco-Cabral,<sup>a</sup> Edgar Alvarado-Méndez,<sup>b</sup> Monica Trejo-Durán,<sup>b</sup> Marcos Flores-Alamo,<sup>c</sup> Eduardo Peña-Cabrera,<sup>a</sup> Marco A. Garcia-Revilla,<sup>a</sup> Miguel A. Vázquez.<sup>a,\*</sup>

<sup>a</sup>Chemistry Department, DCNE, University of Guanajuato, Noria Alta s/n, 36050, Guanajuato, Gto., Mexico.

<sup>b</sup>Engineering Division Campus Irapuato-Salamanca, University of Guanajuato, Palo Blanco s/n, 36885, Salamanca, Gto., Mexico.

<sup>c</sup>Faculty of Chemistry, National Autonomous University of Mexico, Av. Insurgentes Sur S/N, 04510, D.F., México.

\* Corresponding author. E-mail address: mvazquez@ugto.mx (M.A. Vázquez).

|                                                                                                                                                             |         |
|-------------------------------------------------------------------------------------------------------------------------------------------------------------|---------|
| 1. General                                                                                                                                                  | Methods |
| .....                                                                                                                                                       | 1       |
| 2. Synthetic procedures and spectroscopic data of compounds <b>1a-c</b> , <b>2a-c</b> and <b>4a-g</b>                                                       | 2       |
| .....                                                                                                                                                       | 2       |
| 3. General procedure for coumarin-imidazo[1,2- <i>a</i> ]pyridine-3-carbaldehyde derivatives <b>5a-e</b>                                                    | 5       |
| .....                                                                                                                                                       | 5       |
| 4. General procedure for 3-bromo-2-(cumarin-3-yl)imidazo[1,2- <i>a</i> ]pyridine derivatives <b>6a-h</b>                                                    | 20      |
| .....                                                                                                                                                       | 20      |
| 5. General procedure of coumarin-imidazo[1,2- <i>a</i> ]pyridine-3-acrylates derivatives <b>7a-h</b>                                                        | 46      |
| .....                                                                                                                                                       | 46      |
| 6. Nonlinear properties                                                                                                                                     | 79      |
| 7. Computational Details                                                                                                                                    | 79      |
| 8. Equilibrium Geometry in Ground State, Equilibrium Geometry in Excited states, Excitation energies and oscillator strength of compound <b>7a</b> (B3LYP)  | 80      |
| 9. Equilibrium Geometry in Ground State, Equilibrium Geometry in Excited states, Excitation energies and oscillator strength of compound <b>7a'</b> (B3LYP) | 88      |
| .....                                                                                                                                                       | 88      |
| 10. Benchmark of both vertical excitation and emission energy                                                                                               | 94      |
| 11. Static dipole moment, isotropic average polarizability, first hyperpolarizability and second hyperpolarizability of compound <b>7a-h</b>                | 95      |
| 12. Equilibrium Geometry in Ground State, Excitation energies and oscillator strength of coumarin fragment (B3LYP)                                          | 97      |
| 13. Equilibrium Geometry in Ground State, Excitation energies and oscillator strength of imidazo fragment (B3LYP)                                           | 100     |

|                                                                                                            |     |
|------------------------------------------------------------------------------------------------------------|-----|
| 14. Equilibrium Geometry in Ground State and Dihedral angles of compound <b>4a</b> .....                   | 103 |
| 15. Mulliken and Hirshfeld charges for the coumarin and imidazo[1,2- <i>a</i> ]pyridine moieties.<br>..... | 104 |

## 1. General Method

All melting points were determined on Electrothermal 9100 Melting point apparatus and were not corrected. Microwave irradiation was carried out in a Discover SP CEM microwave. Reactions were monitored by thin layer chromatography (TLC) using Sigma Aldrich TLC plates 20 x 20 locating the spots using UV light as the visualizing agent. Column chromatography was performed on silica gel 230-400 mesh. Standard work up: organic layers were dried with Na<sub>2</sub>SO<sub>4</sub> and concentrated in vacuum. Infrared spectra were recorded on Spectrum 100 Perkin Elmer instrument and values are reported in cm<sup>-1</sup> units. UV spectra were recorded on Perkin Elmer lambda 50, and the emission spectra were recorded on Fluorescence spectrophotometer HITACHI F-7000. <sup>1</sup>H and <sup>13</sup>C NMR spectra were recorded on Nuclear Magnetic resonance spectrometer Bruker Avance III HD with the magnet Bruker Ascent 400 MHz or Bruker Avance III HD with the magnet Bruker Ultra Shield 500 MHz HD at 25 °. Chemical shifts are given in δ values relative to TMS (tetramethylsilane) as internal standard. Mass spectra were recorded on Spectrometer Maxis Impact ESI-QTOF-MS, Bruker Daltonics mass spectrometer.

## 2. Synthetic procedures and spectroscopic data of compounds **1a-c**, **2a-c** and **4a-g**

Compounds **1 a-c**, **2 a-c** and **4a-g** were synthesized using literature procedure previously.[1,2]

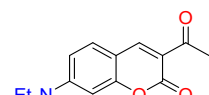 **3-acetyl-7-(diethylamino)-2H-chromen-2-one (1a)**: Yield 82%, m.p. 150 – 151 °C; RMN <sup>1</sup>H NMR (500 MHz, CDCl<sub>3</sub>, 25 °C, TMS) δ = 8.40 (s, 1H, –CH=C–), 7.38 (d, *J* (H,H) = 8.9 Hz, 1H, Ar), 6.62 (dd, *J* (H,H) = 8.9, 1.8 Hz, 1H, Ar), 6.44 (d, *J* (H,H) = 1.4 Hz, 1H, Ar), 3.46 (q, *J* (H,H) = 7.0 Hz, 4H, –CH<sub>2</sub>CH<sub>3</sub>), 2.67 (s, 3H, CH<sub>3</sub>), 1.25 (t, *J* (H,H) = 7.1 Hz, 6H, –CH<sub>2</sub>CH<sub>3</sub>); <sup>13</sup>C NMR (125 MHz, CDCl<sub>3</sub>, 25 °C, TMS) δ = 195.50, 160.78, 158.68, 153.00, 147.75, 131.87, 115.93, 109.87, 108.07, 96.46, 45.11, 30.51, 12.48; FT-IR (KBr) ν<sub>max</sub> = 1725 cm<sup>-1</sup> (C=O), 1664 cm<sup>-1</sup> (C=O lactone); UV–Vis (MeOH) λ<sub>max</sub> = 243 nm, 312 nm.

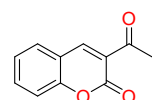 **3-acetyl-2H-chromen-2-one (1b)**: Yield 90%, m.p. 107 – 109 °C, <sup>1</sup>H NMR (500 MHz, CDCl<sub>3</sub>, 25 °C, TMS) δ = 8.52 (s, 1H, –CH=C–), 7.66 (d, *J* (H,H) = 2.8 Hz, 2H, Ar), 7.41 – 7.33 (m, 2H, Ar), 2.74 (s, 3H, CH<sub>3</sub>); <sup>13</sup>C NMR (125 MHz, CDCl<sub>3</sub>, 25 °C, TMS) δ = 195.5, 159.2, 155.3, 147.4, 134.3, 130.2, 125.0, 124.9, 118.3, 116.7, 30.5; FT-IR (KBr) ν<sub>max</sub> = 1741 cm<sup>-1</sup> (C=O), 1678 cm<sup>-1</sup> (C=O lactone); UV–Vis (MeOH) λ<sub>max</sub> = 245 nm.

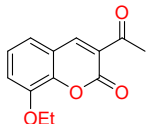

**3-acetyl-8-ethoxy-2H-chromen-2-one (1c):** Rendimiento: 95%, solido de amarillo claro, p.f. = 133 – 136 °C, RMN <sup>1</sup>H NMR (500 MHz, CDCl<sub>3</sub>, 25 °C, TMS) δ = 8.461(s, 1H, –CH=C–), 7.170-7.242 (m, 3H, Ar), 4.206 (q, *J* (H,H) = 7 Hz, 2H, H-8a), 2.726 (s, 3H, H-3b), 1.518 (t, *J* (H,H) = 7 Hz, 3H, H-8b); RMN <sup>13</sup>C (125 MHz, CDCl<sub>3</sub>, 25 °C, TMS) δ = 195.74, 158.97, 147.80, 146.48, 145.28, 124.89, 124.66, 121.36, 119.02, 117.21, 65.21, 30.66, 14.78; FT-IR (KBr)  $\nu_{\max}$  = 1730 cm<sup>-1</sup> (C=O), 1716 cm<sup>-1</sup> (C=O lactone); UV-Vis (MeOH)  $\lambda_{\max}$  = 315.

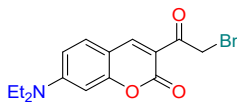

**3-(2-bromoacetyl)-7-(diethylamino)-2H-chromen-2-one (2a):** Yield 73%, m.p. 211 – 213 °C; <sup>1</sup>H NMR (500 MHz, DMSO-*d*<sub>6</sub>, 25 °C, TMS) δ = 8.53 (s, 1H, –CH=C–), 7.48 – 7.37 (m, 1H, Ar), 6.69 – 6.60 (m, 1H, Ar), 6.48 (d, *J* (H,H) = 2.4 Hz, 1H, Ar), 4.77 (s, 2H, –CH<sub>2</sub>Br), 3.48 (q, *J* (H,H) = 7.1 Hz, 4H, –CH<sub>2</sub>CH<sub>3</sub>), 1.26 (t, *J* (H,H) = 7.1 Hz, 6H, –CH<sub>2</sub>CH<sub>3</sub>); <sup>13</sup>C NMR (125 MHz, DMSO-*d*<sub>6</sub>, 25 °C, TMS) δ = 188.57, 160.55, 159.00, 153.59, 149.44, 132.22, 113.98, 112.71, 110.22, 108.44, 96.69, 45.28, 36.77, 12.45; FT-IR (KBr)  $\nu_{\max}$  = 1735 cm<sup>-1</sup> (C=O), 1675 cm<sup>-1</sup> (C=O lactone); UV-Vis (CH<sub>2</sub>Cl<sub>2</sub>)  $\lambda_{\max}$  = 245 nm, 270 nm.

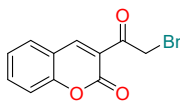

**3-(2-bromoacetyl)-2H-chromen-2-one (2b):** Yield 95%, m.p. 163 – 164 °C; <sup>1</sup>H NMR (500 MHz, CDCl<sub>3</sub>, 25 °C, TMS) δ = 8.64 (1H, s, –CH=C–), 7.71 (t, *J* (H,H) = 7.2 Hz, 2H, Ar), 7.44 – 7.35 (m, 2H, Ar), 4.76 (s, 2H, –CH<sub>2</sub>Br); <sup>13</sup>C NMR (125 MHz, CDCl<sub>3</sub>, 25 °C, TMS) δ = 188.90, 158.88, 155.43, 149.54, 135.12, 130.43, 125.31, 122.19, 118.15, 116.91, 35.59; FT-IR (KBr)  $\nu_{\max}$  = 1727 cm<sup>-1</sup> (C=O), 1685 cm<sup>-1</sup> (C=O lactone); UV-Vis (CH<sub>2</sub>Cl<sub>2</sub>)  $\lambda_{\max}$  = 247 nm.

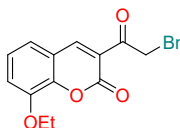

**3-(2-bromoacetyl)-8-ethoxy-2H-chromen-2-one (2c):** gray powder; yield 79%; m.p. 180 – 182 °C; <sup>1</sup>H NMR (500 MHz, CDCl<sub>3</sub>, 25 °C, TMS) δ = 8.60 (s, 1H, –CH=C–), 7.19–7.32 (m, 3H, Ar), 4.77 (s, 2H, CH<sub>2</sub>), 4.23 (q, *J* (H,H) = 7.2 Hz, 2H, –CH<sub>2</sub>CH<sub>3</sub>), 1.54 (t, *J* (H,H) = 7.2 Hz, 3H, –CH<sub>2</sub>CH<sub>3</sub>); <sup>13</sup>C NMR (125 MHz, CDCl<sub>3</sub>, 25 °C, TMS) δ = 173.03, 162.70, 154.19, 151.42, 145.53, 127.92, 125.75, 120.01, 118.43, 115.47, 62.13, 35.10, 13.73; FT-IR (KBr)  $\nu_{\max}$  = 1,722 cm<sup>-1</sup> (C=O), 1,692 cm<sup>-1</sup> (C=O lactone).

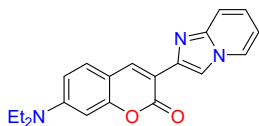

**7-(diethylamino)-3-(imidazo[1,2-a]pyridin-2-yl)-2H-chromen-2-one (4a):** Yield 92%; dark yellow powder; m.p. 167.6 – 169 °C; <sup>1</sup>H (500 MHz, CDCl<sub>3</sub>, 25 °C, TMS) δ (ppm) = 8.65 (s, 1H, –CH=C–), 8.44 (s, 1H, –CH=C–), 8.11 (d, *J* (H,H) = 7,1 Hz, 1H, Ar), 7.56 (d, *J* (H,H) = 8.5 Hz, 1H, Ar), 7.41 (d, *J* (H,H) = 8.5, 1,5 Hz, 1H, Ar), 7.16 (t, *J* (H,H) = 7.5 Hz, 1H, Ar), 6.74 (t, *J* (H,H) = 7.5 Hz, 1H, Ar), 6.62 (d, *J* (H,H) = 9 Hz, 1H, Ar), 6.54 (s, 1H, Ar), 3.44 (q, *J* (H,H) = 7 Hz, 4H, –CH<sub>2</sub>–CH<sub>3</sub>), 1.22 (t, *J* (H,H) = 7 Hz, 6H, –CH<sub>2</sub>–CH<sub>3</sub>) RMN<sup>13</sup>C (125 MHz, CDCl<sub>3</sub>, TMS) δ (ppm): 161.1, 175.8, 176.5, 164.8, 159.5, 158.8, 149.3, 145.8, 144.9, 136.6, 133.6, 132.2, 131.9, 109.3, 109.2, 97.1, 44.9, 12.6; FT-IR (KBr)  $\nu_{\max}$  = 1705 cm<sup>-1</sup> (C=O lactone), 1619 cm<sup>-1</sup> (C=C Ar);

UV-Vis (MeOH)  $\lambda_{\max}$  = 421 nm; HRMS (ESI m/z) Calcd. for  $C_{20}H_{19}N_3O_2$   $[M+H]^+$  334.1550, found 334.1564.

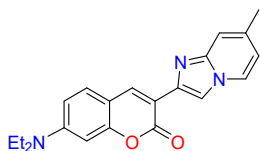

**7-(diethylamino)-3-(7-methylimidazo[1,2-a]pyridin-2-yl)-2H-chromen-2-one (4b):** Yield 87%; dark yellow powder; m.p. 200.6 – 202°C; RMN  $^1H$  (500 MHz,  $CDCl_3$ , 25 °C, TMS)  $\delta$  (ppm) = 8.62 (s, 1H,  $-\underline{CH=C-}$ ), 8.36 (s, 1H,  $-\underline{CH=C-}$ ), 7.98 (d,  $J$  (H,H) = 7 Hz, 1H, Ar), 7.41 (d,  $J$  (H,H) = 8.5 Hz, 1H, Ar), 7.31 (s, 1H, Ar), 6.62 (dd,  $J$  (H,H) = 8.5, 2 Hz, 1H, Ar), 6.59 (dd,  $J$  (H,H) = 7, 1.5 Hz, 1H, Ar), 6.54 (s,  $J$  (H,H) = 2 Hz, 1H, Ar), 3.44 (q,  $J$  (H,H) = 7 Hz, 4H,  $-\underline{CH_2-CH_3}$ ), 2.39 (s, 3H), 1.23 (t,  $J$  (H,H) = 7 Hz, 6H,  $-\underline{CH_2-CH_3}$ ); RMN  $^{13}C$  (125 MHz,  $CDCl_3$ , TMS)  $\delta$  (ppm): 161.3, 155.88, 150.8, 145.7, 139.5, 139.1, 136.4, 129.7, 126.4, 115.4, 115.1, 114.2, 112.1, 109.5, 97.4, 45.2, 21.7, 12.8; FT-IR (KBr)  $\nu_{\max}$  = 1712  $cm^{-1}$  (C=O lactone), 1621  $cm^{-1}$  (C=C Ar); UV-Vis (MeOH)  $\lambda_{\max}$  = 422 nm; HRMS (ESI m/z) Calcd. for  $C_{21}H_{21}N_3O_2$   $[M+H]^+$  348.1707, found 348.1725.

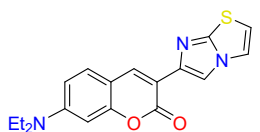

**7-(diethylamino)-3-(imidazo[2,1-b]thiazol-6-yl)-2H-chromen-2-one (4c):** Yield 78%; dark brown powder; m.p. 173 – 175°C; RMN  $^1H$  (500 MHz,  $CDCl_3$ , 25 °C, TMS)  $\delta$  (ppm) = 8.45 (s, 1H,  $-\underline{CH=C-}$ ), 8.30 (s, 1H,  $-\underline{CH=C-}$ ), 7.41 (d,  $J$  (H,H) = 4.5 Hz, 1H, Ar), 7.37 (d,  $J$  (H,H) = 9 Hz, 1, Ar), 6.78 (d,  $J$  (H,H) = 4.5 Hz, 1H, Ar), 6.61 (dd,  $J$  (H,H) = 9, 2.5 Hz, 1H, Ar), 6.52 (s,  $J$  (H,H) = 2.5 Hz, 1H, Ar), 3.43 (q,  $J$  (H,H) = 7 Hz, 4H,  $-\underline{CH_2-CH_3}$ ), 1.22 (t,  $J$  (H,H) = 7 Hz, 6H,  $-\underline{CH_2-CH_3}$ ); RMN  $^{13}C$  (125 MHz,  $CDCl_3$ , TMS)  $\delta$  (ppm): 161.0, 155.6, 150.5, 15.15, 141.9, 137.89, 129.4, 119.0, 114.4, 112.5, 112.3, 109.5, 109.4, 97.3, 45.1, 12.8; FT-IR (KBr)  $\nu_{\max}$  = 1710  $cm^{-1}$  (C=O lactone), 1618  $cm^{-1}$  (C=C Ar); UV-Vis (MeOH)  $\lambda_{\max}$  = 415 nm; HRMS (ESI m/z) Calcd. for  $C_{18}H_{17}N_3O_2$   $[M+H]^+$  340.1114, found 340.1118.

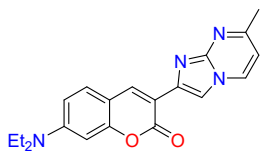

**7-(diethylamino)-3-(7-methylimidazo[1,2-a]pyrimidin-2-yl)-2H-chromen-2-one (4d):** Yield 98%; yellow powder; m.p. 229.4 – 231 °C; RMN  $^1H$  (500 MHz,  $CDCl_3$ , 25 °C, TMS)  $\delta$  (ppm) = 8.72 (s, 1H,  $-\underline{CH=C-}$ ), 8.26 (s, 1H,  $-\underline{CH=C-}$ ), 8.24 (d,  $J$  (H,H) = 7 Hz, 1H, Ar), 7.38 (d,  $J$  (H,H) = 8.5 Hz, 1H, Ar), 6.65 (d,  $J$  (H,H) = 7 Hz, 1H, Ar), 6.58 (d,  $J$  (H,H) = 9 Hz, 1H, Ar), 6.48 (s, 1H,  $\underline{CH_3}$ ), 3.40 (q,  $J$  (H,H) = 7 Hz, 4H,  $-\underline{CH_2-CH_3}$ ), 2.57 (t,  $J$  (H,H) = 7 Hz, 6H,  $-\underline{CH_2-CH_3}$ ); RMN  $^{13}C$  (125 MHz,  $CDCl_3$ , TMS)  $\delta$  (ppm) = 161.0, 160.4, 156.1, 150.9, 148.2, 140.6, 140.2, 132.8, 129.7, 113.4, 109.8, 109.4, 109.2, 97.8, 45.0, 25.1, 12.6; FT-IR (KBr)  $\nu_{\max}$  = 1714  $cm^{-1}$  (C=O lactone), 1620  $cm^{-1}$  (C=C Ar); UV-Vis (MeOH)  $\lambda_{\max}$  = 433 nm; HRMS (ESI m/z) Calcd. for  $C_{20}H_{20}N_4O_2$   $[M+H]^+$  349.1659, found 349.1671.

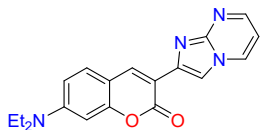

**7-(diethylamino)-3-(imidazo[1,2-a]pyrimidin-2-yl)-2H-chromen-2-one (4e):** Yield 94%; yellow powder; m.p. 158 – 160°C; RMN  $^1H$  (500 MHz,  $CDCl_3$ , 25 °C, TMS)  $\delta$  (ppm) = 8.78 (s, 1H,  $-\underline{CH=C-}$ ), 8.50 (dd,  $J$  (H,H) = 4, 2 Hz, 1H, Ar), 8.41 (d,  $J$  (H,H) = 2 Hz, 1H, Ar), 8.40 (s, 1H,  $-\underline{CH=C-}$ ), 7.42 (d,  $J$  (H,H) = 7.59 Hz, 1H, Ar), 6.82 (t,  $J$  (H,H) = 4, 2.5 Hz, 1H, Ar), 6.662

(dd,  $J$  (H,H) = 9, 2.5 Hz, 1H, Ar1) , 6.51 (s,  $J$  (H,H) = 2Hz, 1H, Ar), 3.43 (q,  $J$  (H,H) = 7 Hz, 4H,  $-\text{CH}_2-\text{CH}_3$ ), 1.22 (t,  $J$  (H,H) = 7 Hz, 6H,  $-\text{CH}_2-\text{CH}_3$ ); RMN  $^{13}\text{C}$  (125 MHz,  $\text{CDCl}_3$ , TMS)  $\delta$  (ppm) = 161.2, 156.4, 151.2, 150.40, 148.3, 141.7, 140.9, 133.7, 130.0, 113.2, 110.4, 109.6, 109.4, 108.7, 97.3, 45.2, 12.7, FT-IR (KBr)  $\nu_{\text{max}}$  = 1702  $\text{cm}^{-1}$  (C=O lactone), 1613  $\text{cm}^{-1}$  (C=C Ar); UV-Vis (MeOH)  $\lambda_{\text{max}}$  = 436 nm; HRMS (ESI m/z) Calcd. for  $\text{C}_{19}\text{H}_{18}\text{N}_4\text{O}_2$   $[\text{M}+\text{H}]^+$  335.1503, found 335.1522.

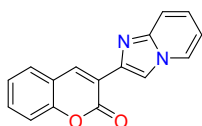

**3-(imidazo[1,2-a]pyridin-2-yl)-2H-chromen-2-one (4f):** Yield 70%; brown powder; m.p. 297 – 300 °C; RMN  $^1\text{H}$  (500 MHz,  $\text{CDCl}_3$ , 25 °C, TMS)  $\delta$  (ppm) = 8.76 (s, 1H,  $-\text{CH}=\text{C}-$ ), 8.53 (s, 1H,  $-\text{CH}=\text{C}-$ ), 8.13 (d,  $J$  (H,H) = 7 Hz, 1H, Ar), 7.62 (d,  $J$  (H,H) = 7.5, 1H, Ar), 7.58 (d,  $J$  (H,H) = 9.5 Hz, 1H, Ar), 7.52 (t,  $J$  (H,H) = 7.5 Hz, 1H, Ar), 7.37 (d,  $J$  (H,H) = 8 Hz, 1H, Ar), 7.31 (t,  $J$  (H,H) = 7.5 Hz, 1H, Ar), 7.21 (t,  $J$  (H,H) = 6.5 Hz, 1H, Ar), 6.79 (t,  $J$  (H,H) = 6.5 Hz, 1H, Ar); RMN  $^{13}\text{C}$  (125 MHz,  $\text{CDCl}_3$ , 25 °C, TMS)  $\delta$  (ppm) = 160.2, 153.3, 145.4, 138.5, 138.3, 131.63, 128.6, 126.5, 126.0, 124.9, 121.1, 120.0, 117.4, 116.7, 114.2, 112.8; FT-IR (KBr)  $\nu_{\text{max}}$  = 1726  $\text{cm}^{-1}$  (C=O lactone), 1636  $\text{cm}^{-1}$  (C=C Ar); UV-Vis (MeOH)  $\lambda_{\text{max}}$  = 345 nm; HRMS (ESI m/z) Calcd. for  $\text{C}_{16}\text{H}_{10}\text{N}_2\text{O}_2$   $[\text{M}+\text{H}]^+$  263.0815, found 263.0820.

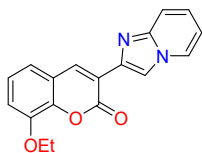

**8-ethoxy-3-(imidazo[1,2-a]pyridin-2-yl)-2H-chromen-2-one (4g):** Yield: 41%, dark brown powder; m.p. = 157 – 159 °C, RMN  $^1\text{H}$  (500 MHz,  $\text{CDCl}_3$ , 25 °C, TMS)  $\delta$  (ppm) = 8.75 (s, 1H,  $-\text{CH}=\text{C}-$ ), 8.57 (s, 1H,  $-\text{CH}=\text{C}-$ ), 7.14 (d,  $J$  (H,H) = 6.5 Hz, 1H, Ar), 7.59 (d,  $J$  (H,H) = 6.5 Hz, 1H, Ar), 7.20 (m, 3H, Ar), 7.07 (d, 1H, Ar), 6.78 (t,  $J$  (H,H) = 6.5 Hz, 1H, Ar), 4.21 (q,  $J$  (H,H) = 7 Hz, 2H,  $-\text{CH}_2-\text{CH}_3$ ), 1.52 (t,  $J$  (H,H) = 7 Hz, 3H,  $-\text{CH}_2-\text{CH}_3$ ); RMN  $^{13}\text{C}$  (125 MHz,  $\text{CDCl}_3$ , 25 °C, TMS)  $\delta$  (ppm) = 159.65, 146.40, 145.20, 143.01, 138.36, 138.33, 126.28, 125.80, 124.53, 121.09, 120.54, 119.86, 117.21, 114.56, 114.07, 112.62, 65.07, 14.90. FT-IR (KBr)  $\nu_{\text{max}}$  = 1724  $\text{cm}^{-1}$  (C=O lactone); UV-Vis (MeOH)  $\lambda_{\text{max}}$  = 340 nm; HRMS (ESI m/z) Calcd. for  $\text{C}_{18}\text{H}_{15}\text{N}_2\text{O}_3$   $[\text{M}+\text{H}]^+$  307.1077, found 307.1068.

### 3. General procedure for coumarin-imidazo[1,2-a]pyridine-3-carbaldehyde derivatives 5a-e.

Synthesis of **5a-e** was carried out using the Vilsmeier-Haack formulation.[3] In a 50 mL round bottom flask was added **4a-e** derivatives (1mmol), then was purged with nitrogen, 15 mL of DMF was added and placed in agitation. In a second 50 mL round bottom flask with nitrogen atmosphere DMF was added and placed in an ice bath for 10 min (2.2 mmol).  $\text{POCl}_3$  were slowly added (2.4 mmol) and the mixture was kept in constant agitation in an ice bath for 15 min. Finally, the solution from the first flask was transferred to the second flask through a steel cannula and heated to 60 °C for 1 h. The reaction was treated with 10% NaOH solution and a solid product was formed. The product was filtered and purified using a chromatographic column with an Hex/AcOEt 70:30 elution system.

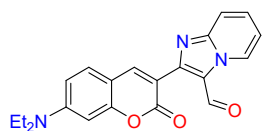

**2-(7-(diethylamino)-2-oxo-2H-chromen-3-yl)imidazo[1,2-a]pyridine-3-carbaldehyde (5a):** Yield 94%; yellow powder; m.p. 228 – 229.6 °C; RMN <sup>1</sup>H (500 MHz, CDCl<sub>3</sub>, 25 °C, TMS) δ (ppm) = 10.22 (s, 1H, -COH), 9.61 (d, *J* (H,H) = 6.5 Hz, 1H, Ar), 8.24 (s, 1H, -CH=C-), 7.70 (d, *J* (H,H) = 9 Hz, 1H, Ar), 7.50 (t, *J* (H,H) = 8.5-1.5 Hz, 1H, Ar), 7.36 (d, *J* (H,H) = 9 Hz, 1H, Ar), 7.05 (t, *J* (H,H) = 6,1 Hz, 1H, Ar), 6.60 (d, *J* (H,H) = 9, 2.5 Hz, 1H, Ar), 6.50 (s, *J* (H,H) = 2.5, 1H, -CH=C-), 3.43 (q, *J* (H,H) = 7.5 Hz, 4H, -CH<sub>2</sub>-CH<sub>3</sub>), 1.21 (t, *J* (H,H) = 7.5 Hz, 6H, CH<sub>3</sub>); RMN <sup>13</sup>C (125 MHz, CDCl<sub>3</sub>, 25 °C, TMS) δ (ppm) = 181.5, 177.2, 171.7, 171.1, 167.6, 165.6, 150.1, 149.9, 148.8, 141.0, 137.0, 135.1, 132.6, 129.5, 128.7, 97.1, 45.2, 12.7; FT-IR (KBr) ν<sub>max</sub> = 2736 cm<sup>-1</sup> (H-C=O), 1698 cm<sup>-1</sup> (C=O lactone), 1647 cm<sup>-1</sup> (H-C=O); UV-Vis (MeOH) λ<sub>max</sub> = 422 nm; HRMS (ESI m/z) Calcd. for C<sub>20</sub>H<sub>18</sub>N<sub>4</sub>O<sub>3</sub> [M+H]<sup>+</sup> 362.1499, found 362.1495.

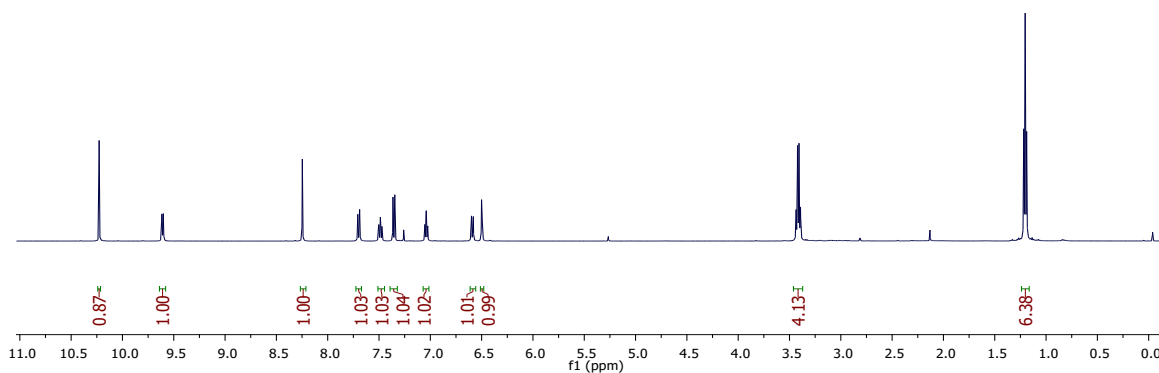

**Figure SI-1.** <sup>1</sup>H NMR spectra of **5a** on CDCl<sub>3</sub> 500 MHz

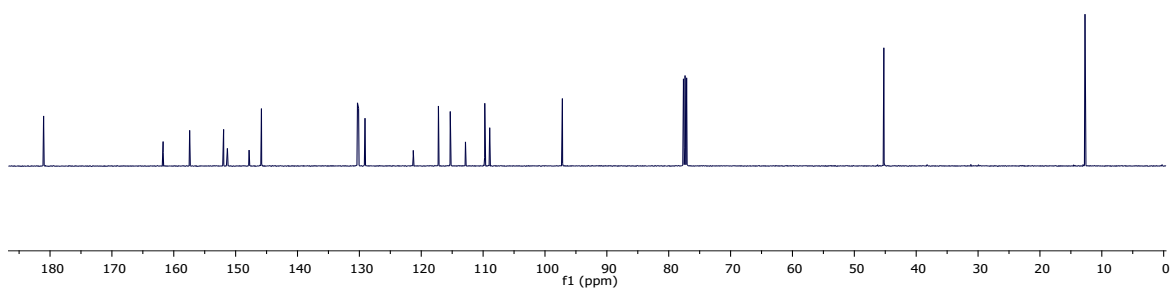

Figure SI-2.  $^{13}\text{C}$  NMR spectra of **5a** on  $\text{CDCl}_3$  125 MHz.

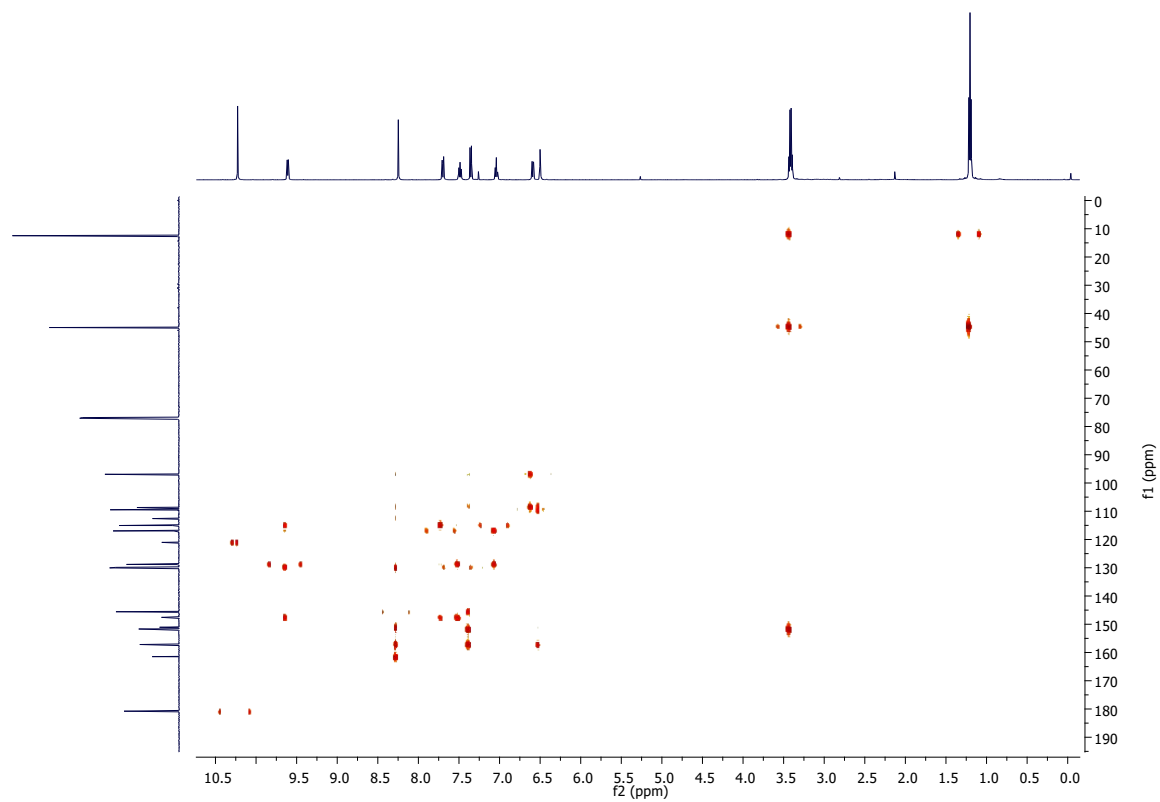

Figure SI-3. HMBC NMR spectra of **5a** on  $\text{CDCl}_3$

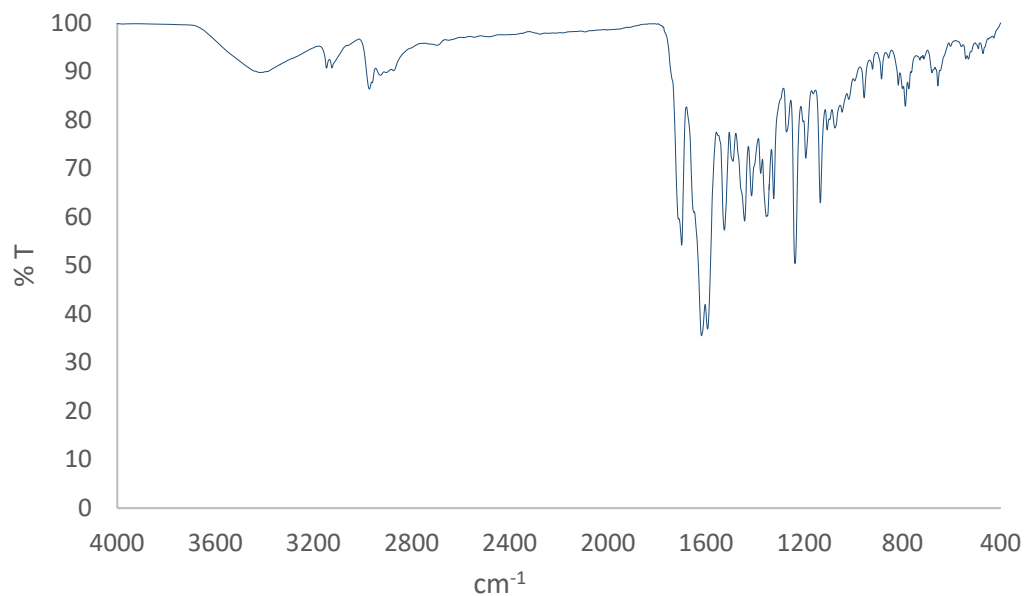

Figure SI-4. IR spectra for **5a** in KBr.

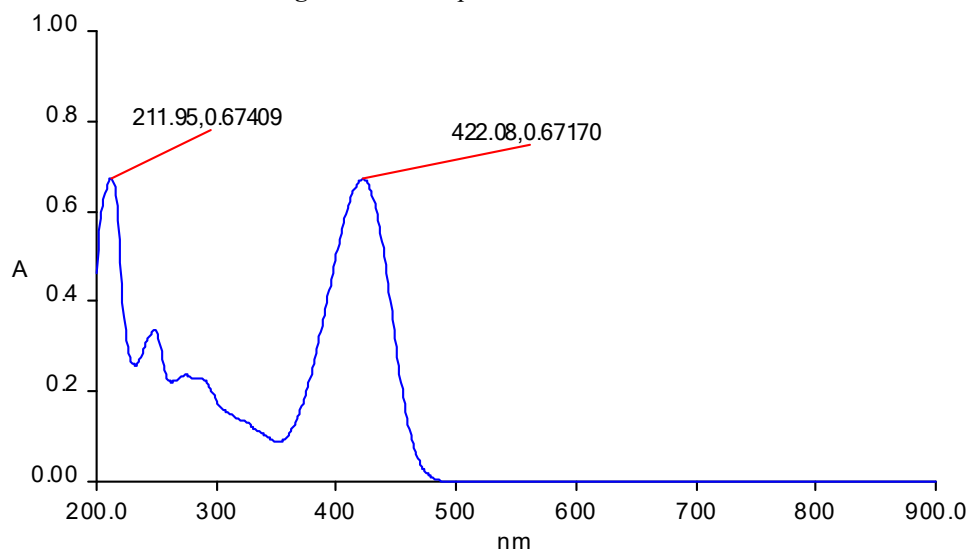

Figure SI-5. UV-Vis spectra of **5a** in MeOH.

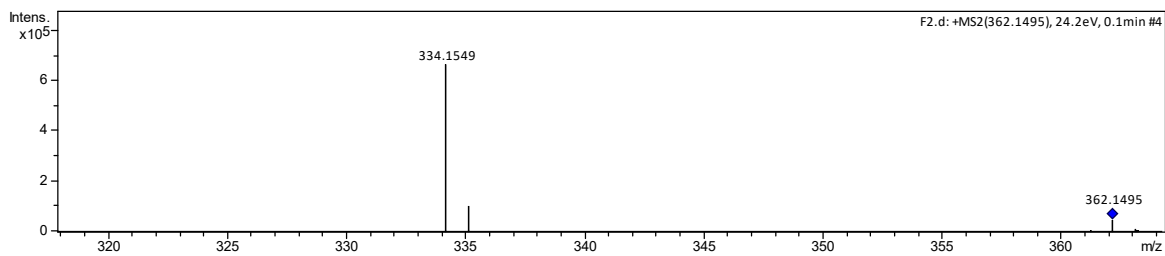

Figure SI-6. ESI-MS chromatogram of **5a**.



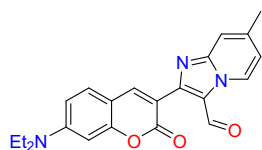

**2-(7-(diethylamino)-2-oxo-2H-chromen-3-yl)-7-methylimidazo[1,2-a]pyridine-3-carbaldehyde (5b):** Yield 97%; yellow powder; m.p. 174 – 176°C; RNM  $^1\text{H}$  (500 MHz,  $\text{CDCl}_3$ , 25 °C, TMS)  $\delta$  (ppm) = 10.35 (s, 1H,  $-\text{COH}$ ), 9.65 (d,  $J$  (H,H) = 7 Hz, 1H, Ar), 8.79 (s, 1H,  $-\text{CH}=\text{C}-$ ), 8.01 (s, 1H, Ar), 7.50 (d,  $J$  (H,H) = 9 Hz, 1H, Ar), 7.20 (d,  $J$  (H,H) = 7 Hz, 1H, Ar), 6.67 (dd,  $J$  (H,H) = 9, 2.5 Hz, 1H, Ar), 6.51 (sd,  $J$  (H,H) = 2 Hz, 1H, Ar), 3.49 (q,  $J$  (H,H) = 7 Hz, 4H,  $-\text{CH}_2-\text{CH}_3$ ), 2.59 (s, 3H,  $\text{CH}_3$ ), 1.26 (t,  $J$  (H,H) = 7 Hz, 6H,  $\text{CH}_3$ ); RNM  $^{13}\text{C}$  (125 MHz,  $\text{CDCl}_3$ , 25 °C, TMS)  $\delta$  (ppm) = 181.6, 160.9, 158.1, 153.3, 148.1, 131.9, 128.8, 120.5, 119.3, 113.4, 110.5, 109.0, 97.1, 45.5, 29.2, 12.8. FT-IR (KBr)  $\nu_{\text{max}}$  = 2687  $\text{cm}^{-1}$  ( $\text{H}-\text{C}=\text{O}$ ), 1716  $\text{cm}^{-1}$  ( $\text{C}=\text{O}$  lactone), 1600  $\text{cm}^{-1}$  ( $-\text{O}-\text{C}=\text{O}$ ); UV-Vis (MeOH)  $\lambda_{\text{max}}$  = 422 nm.

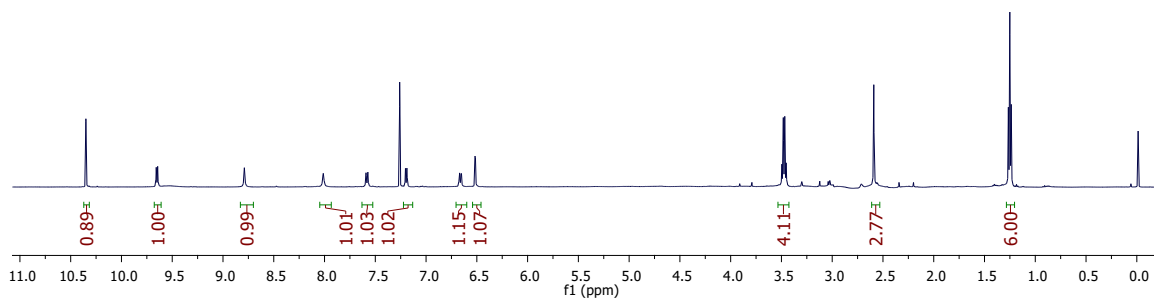

Figure SI-7.  $^1\text{H}$  NMR spectra of **5b** on  $\text{CDCl}_3$ , 500 MHz

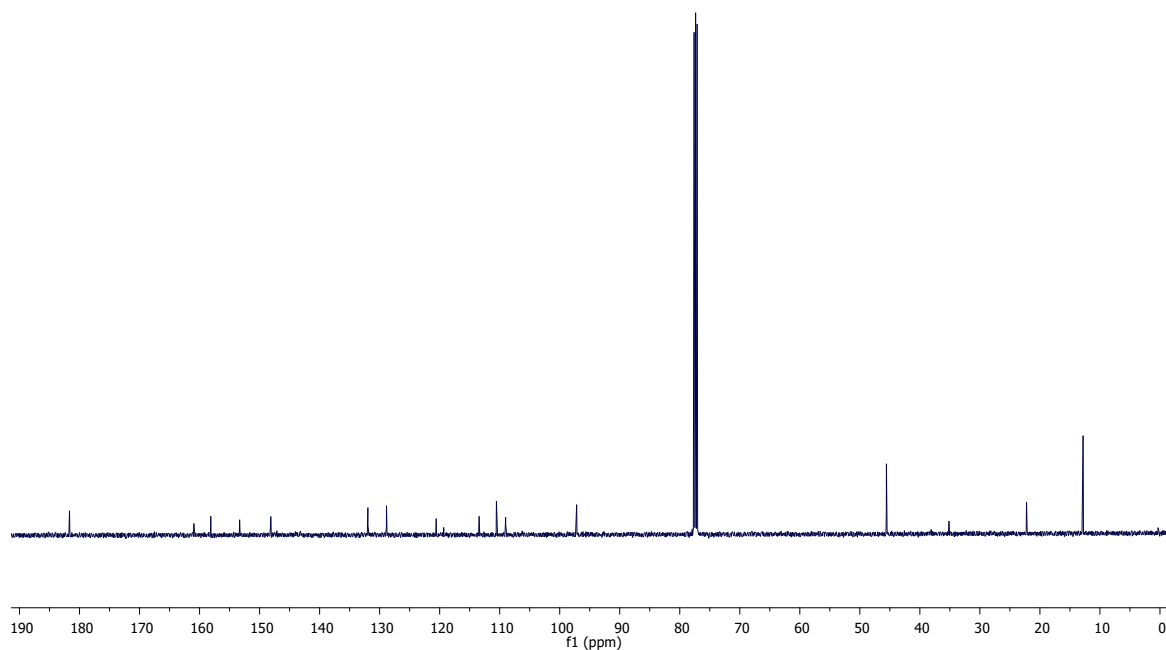

Figure SI-8.  $^{13}\text{C}$  NMR spectra of **5b** on  $\text{CDCl}_3$  125 MHz.

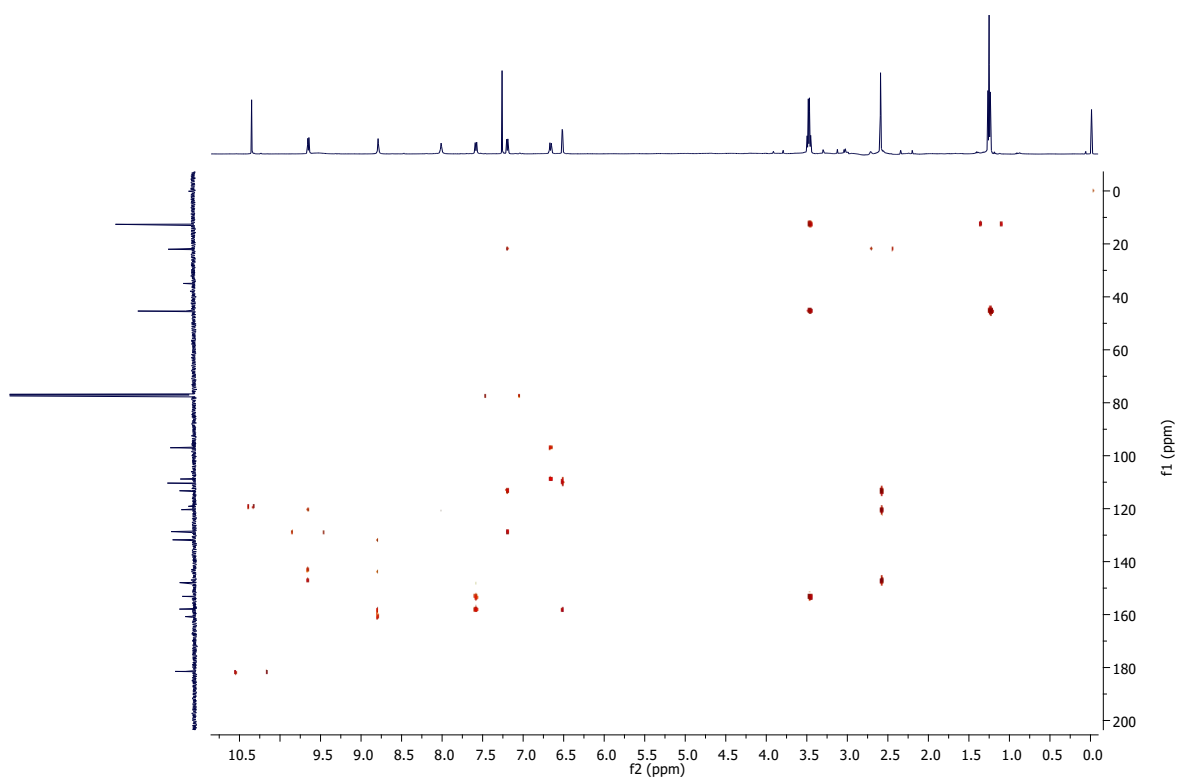

Figure SI-9. HMBC NMR spectra of **5b** on  $\text{CDCl}_3$

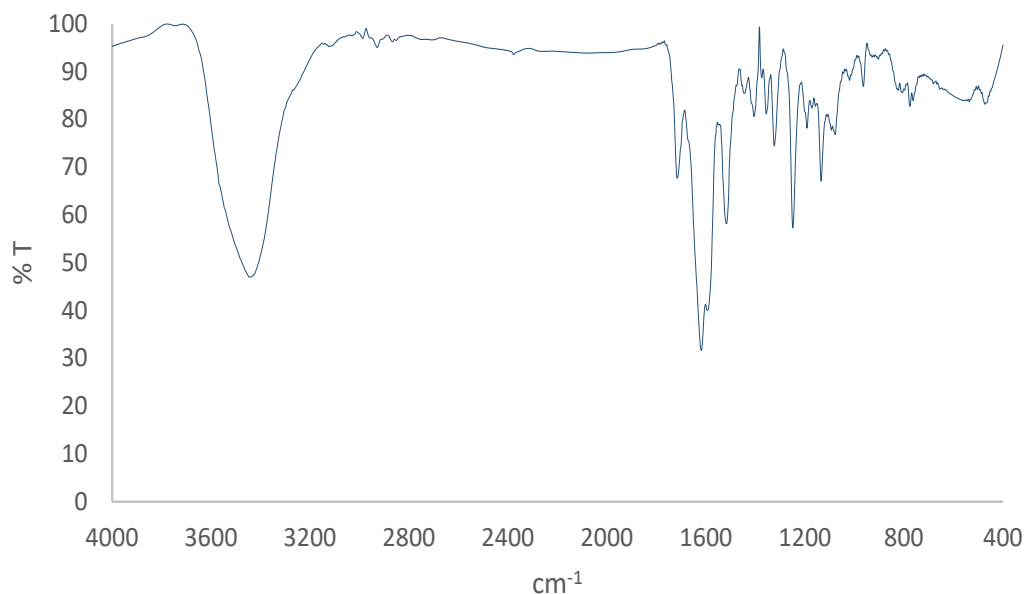

Figure SI-10. IR spectra for **5b** in KBr.

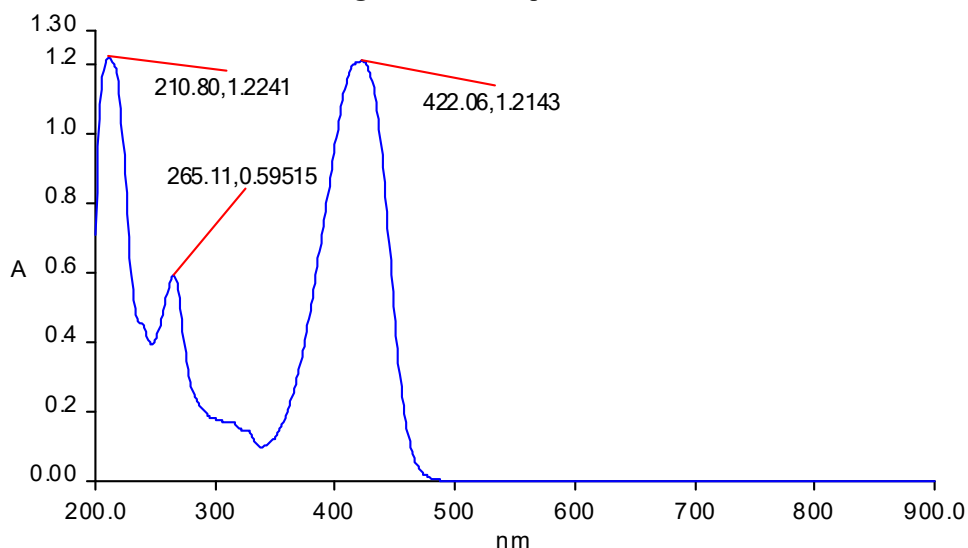

Figure SI-11. UV-Vis spectra of **5b** in MeOH.

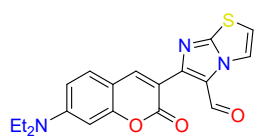

**6-(7-(diethylamino)-2-oxo-2H-chromen-3-yl)imidazo[2,1-b]thiazole-5-carbaldehyde (5c):** Yield 60%; brown powder; m.p. 194 – 196°C;  $^1\text{H}$  RMN (500 MHz,  $\text{CDCl}_3$ , 25 °C, TMS)  $\delta$  (ppm) = 10.20 (s, 1H,  $-\text{COH}$ ), 8.38 (d,  $J$  (H,H) = 4.5 Hz, 1H,  $-\text{CH}=\text{C}-$ ), 8.26 (s, 1H,  $-\text{CH}=\text{C}-$ ), 7.35 (d,  $J$  (H,H) = 9 Hz, 1H, Ar), 6.98 (d,  $J$  (H,H) = 4.5 Hz, 1H,  $-\text{CH}=\text{C}-$ ), 6.60 (dd,  $J$  (H,H) = 9, 2 Hz, 1H, Ar), 6.49 (sd,  $J$  = 2 Hz, 1H, Ar), 3.43 (q,  $J$  (H,H) = 7 Hz, 4H,  $-\text{CH}_2-\text{CH}_3$ ), 1.21 (t,  $J$  (H,H) = 7 Hz, 6H,  $\text{CH}_3$ ); RMN  $^{13}\text{C}$  (125 MHz,  $\text{CDCl}_3$ , 25 °C, TMS)  $\delta$  (ppm) = 180.5, 161.4, 157.1, 155.0, 151.8, 150.3, 144.8, 130.2, 124.7, 122.0, 114.4, 113.0, 109.7, 108.9, 97.1, 45.2, 12.7; FT-IR (KBr)  $\nu_{\text{max}}$  = 2743  $\text{cm}^{-1}$  ( $\text{H}-\text{C}=\text{O}$ ), 1699  $\text{cm}^{-1}$  ( $\text{C}=\text{O}$  lactone), 1619  $\text{cm}^{-1}$  ( $\text{H}-\text{C}=\text{O}$ ); UV-Vis (MeOH)  $\lambda_{\text{max}}$  = 425 nm; HRMS (ESI  $m/z$ ) Calcd. for  $\text{C}_{19}\text{H}_{17}\text{N}_3\text{O}_3\text{S}$   $[\text{M}+\text{H}]^+$  368.1063, found 368.1062.

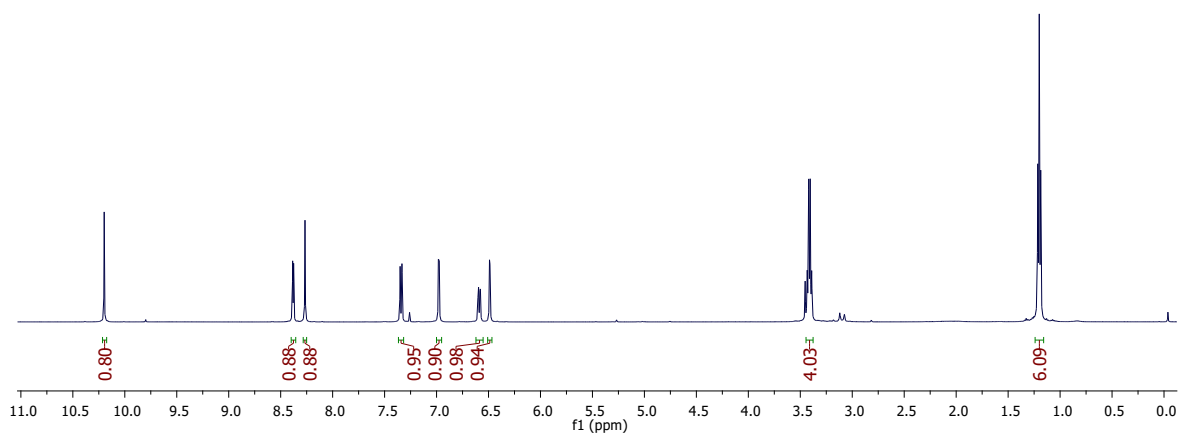

Figure SI-12. <sup>1</sup>H NMR spectra of **5c** on CDCl<sub>3</sub> 500 MHz

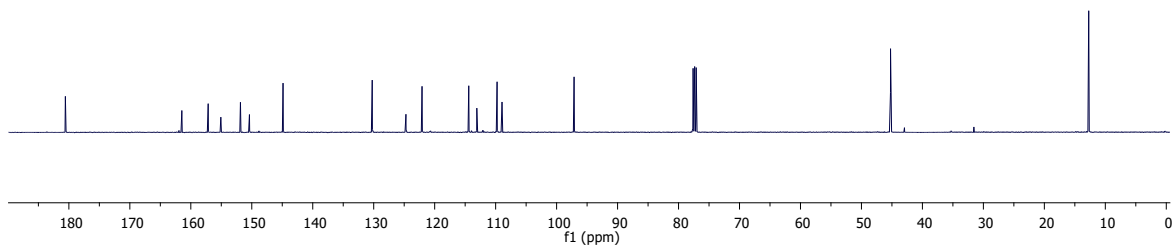

Figure SI-13. <sup>13</sup>C NMR spectra of **5b** on CDCl<sub>3</sub> 125 MHz.

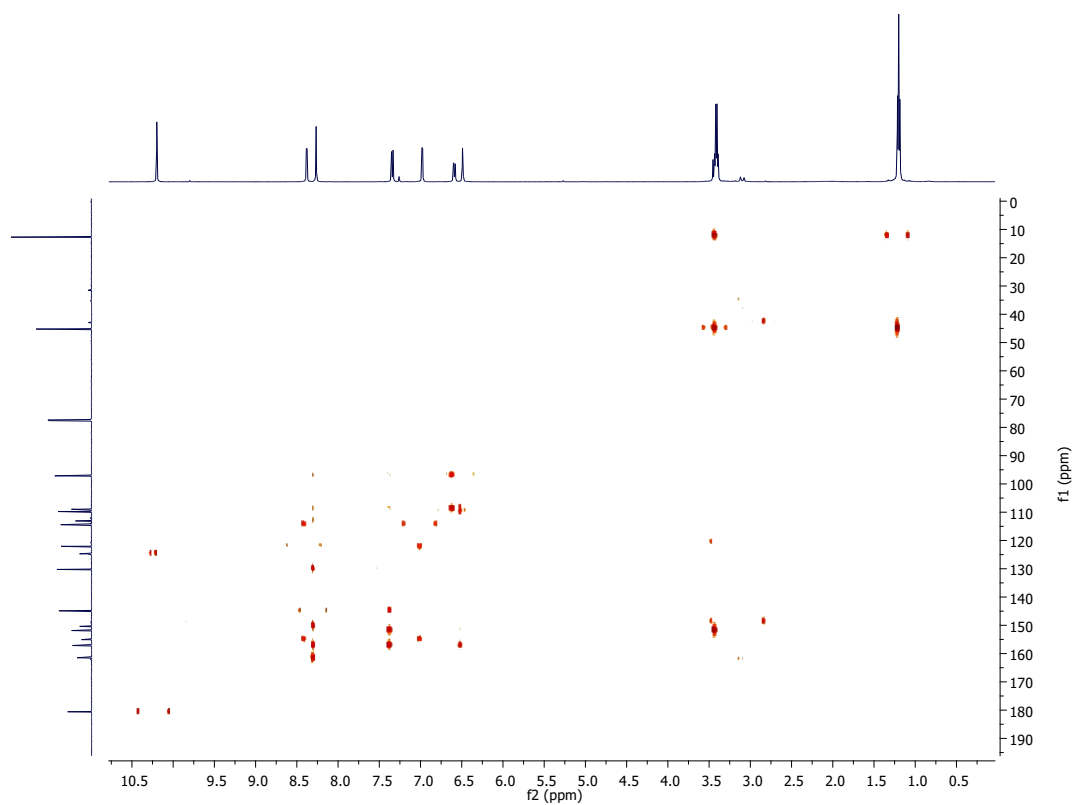

**Figure SI-14.** HMBC NMR spectra of **5c** on  $\text{CDCl}_3$

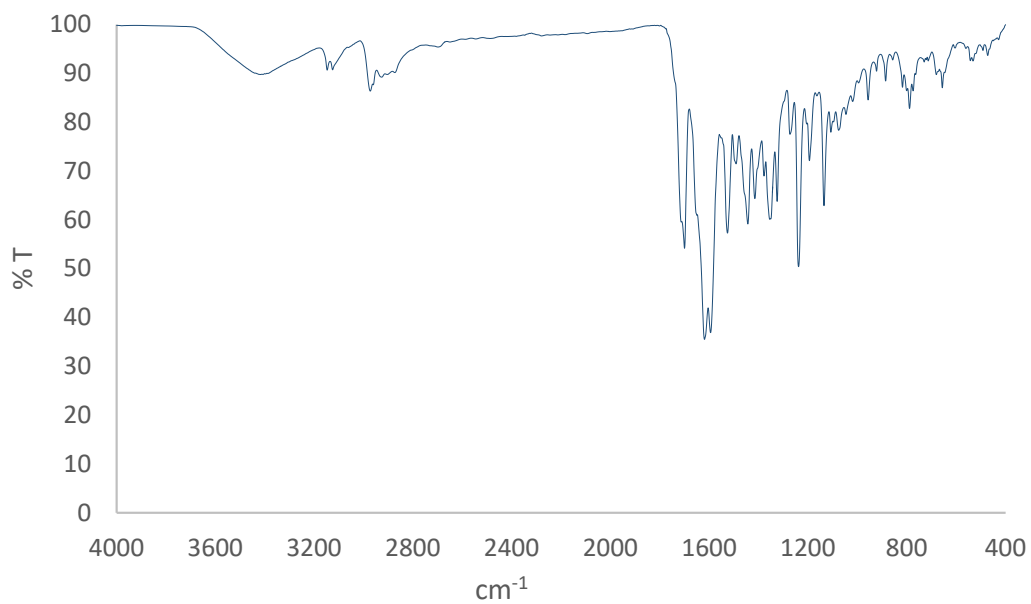

**Figure SI-15.** IR spectra for **5c** in KBr.

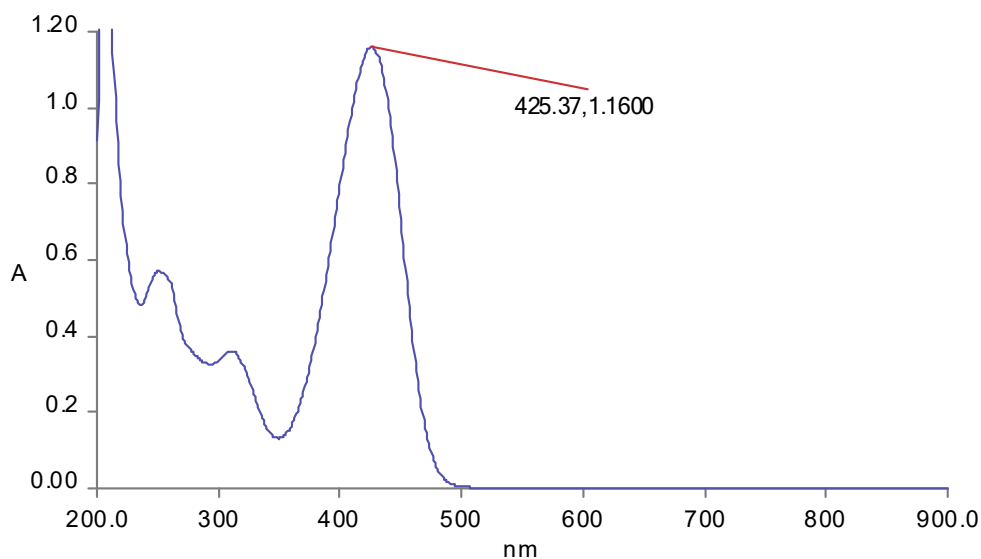

Figure SI-16. UV-Vis spectra of **5c** in MeOH.

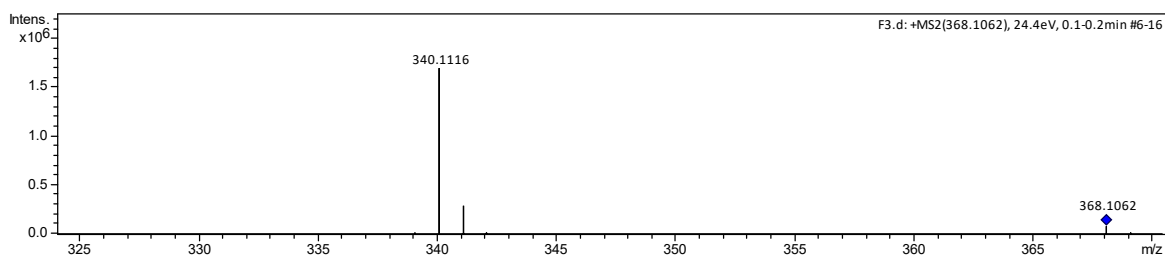

Figure SI-17. ESI-MS chromatogram of **5c**.

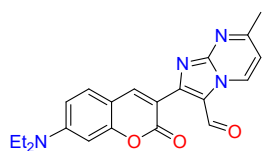

**2-(7-(diethylamino)-2-oxo-2H-chromen-3-yl)-7-methylimidazo[1,2-a]pyrimidine-3-carbaldehyde (5d):** Yield 76%; orange powder; m.p. 778-779.3°C; RMN <sup>1</sup>H (500 MHz, CDCl<sub>3</sub>, 25 °C, TMS) δ (ppm) = 10.41 (s, 1H, -COH), 9.66 (d, *J* (H,H) = 7.5 Hz, 1H, Ar), 8.52 (d, *J* (H,H) = 7.5 Hz, 1H, Ar), 8.43 (s, 1H, -CH=C-), 7.44 (d, *J* (H,H) = 9 Hz, 1H, Ar), 6.66 (dd, *J* (H,H) = 9, 2.5 Hz, 1H, Ar), 6.52 (sd, *J* = 2.5 Hz, 1H, Ar), 3.49 (q, *J* (H,H) = 7.5 Hz, 4H, -CH<sub>2</sub>-CH<sub>3</sub>), 2.16 (s, 3H, CH<sub>3</sub>), 1.26 (t, *J* (H,H) = 7.5 Hz, 6H, CH<sub>3</sub>); RMN <sup>13</sup>C (125 MHz, CDCl<sub>3</sub>, 25 °C, TMS) δ (ppm) = 182.6, 161.3, 161.3, 157.7, 152.6, 146.7, 138.6, 130.9, 111.3, 110.2, 109.0, 107.1, 97.2, 53.7, 45.4, 19.8; FT-IR (KBr) ν<sub>max</sub> = 1711 cm<sup>-1</sup> (C=O lactone), 1619 cm<sup>-1</sup> (H-C=O); UV-Vis (MeOH) λ<sub>max</sub> = 431 nm; HRMS (ESI m/z) Calcd. for C<sub>21</sub>H<sub>20</sub>N<sub>4</sub>O<sub>3</sub> [M+H]<sup>+</sup> 376.1635, found 376.1638.

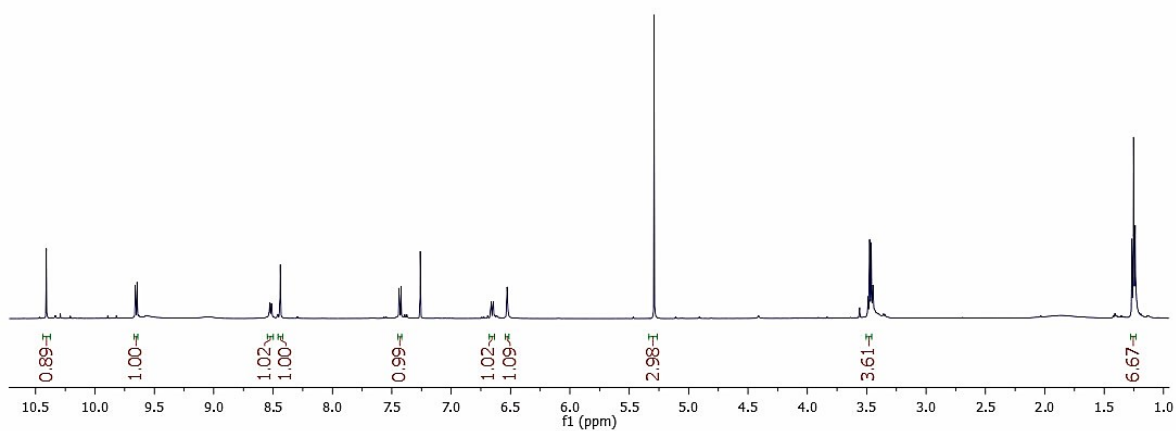

Figure SI-18. <sup>1</sup>H NMR spectra of **5d** on CDCl<sub>3</sub> 500 MHz

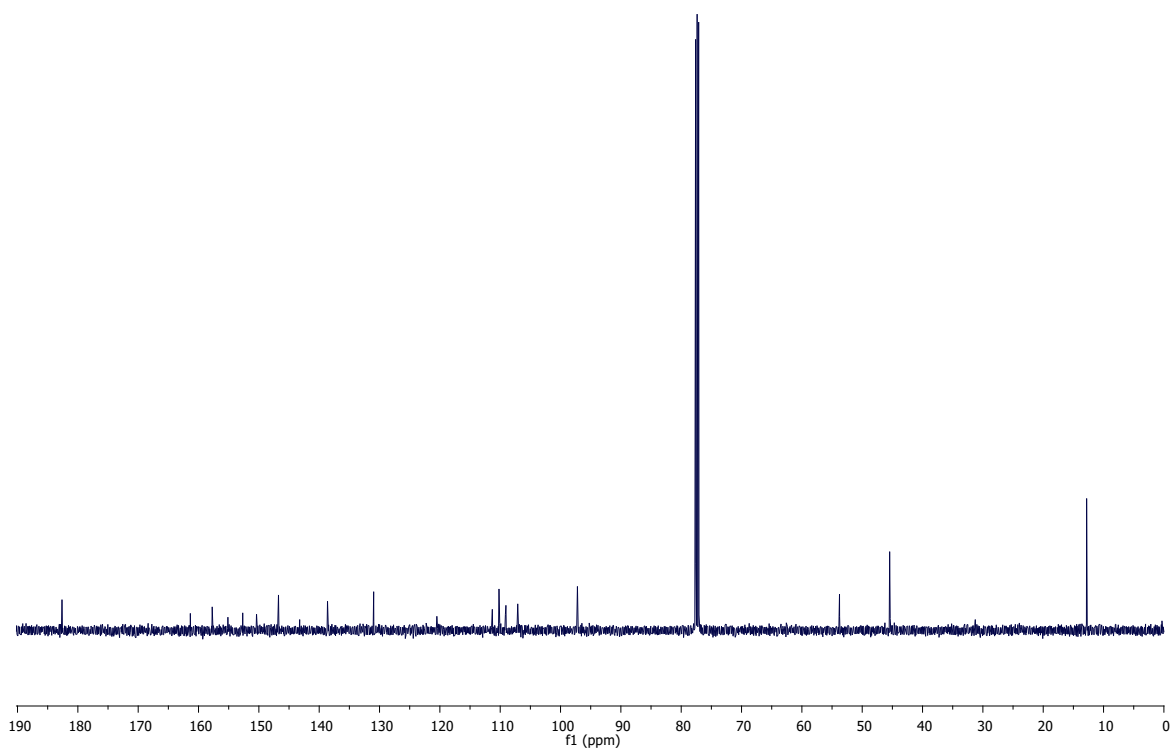

Figure SI-19. <sup>13</sup>C NMR spectra of **5d** on CDCl<sub>3</sub> 125 MHz.

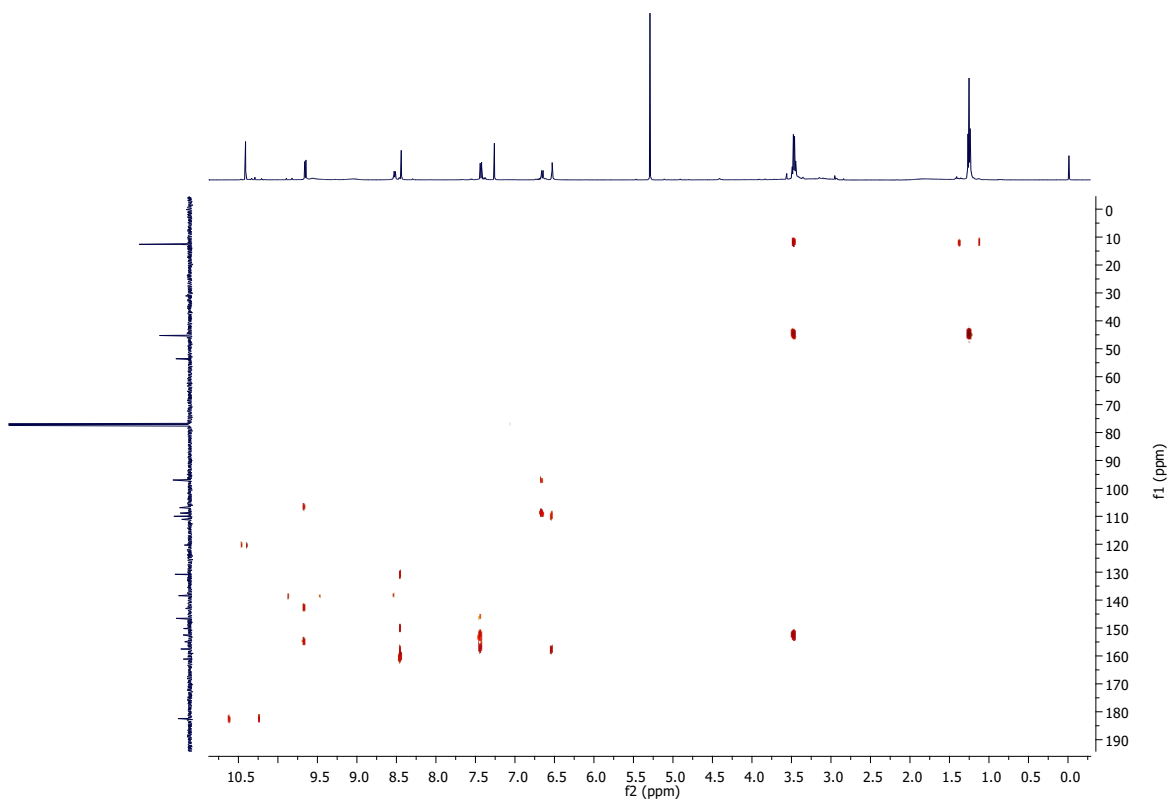

**Figure SI-20.** HMBC NMR spectra of **5d** on  $\text{CDCl}_3$

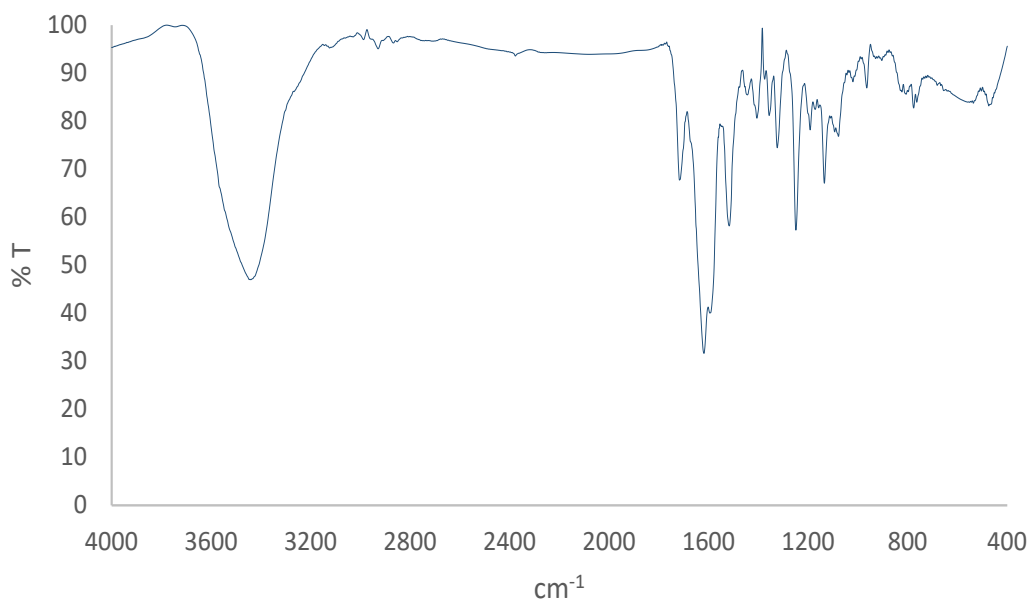

**Figure SI-21.** IR spectra for **5b** in KBr.



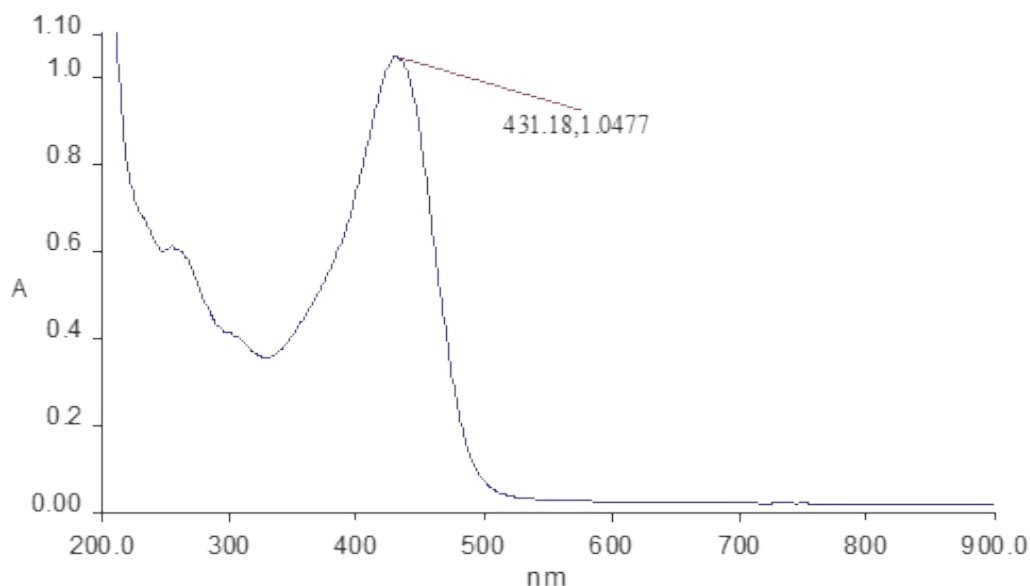

Figure SI-22. UV-Vis spectra of **5d** in MeOH.

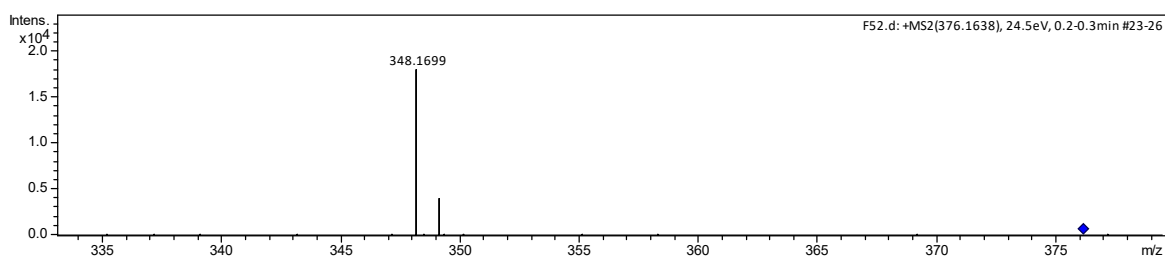

Figure SI-23. ESI-MS chromatogram of **5e**.

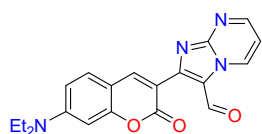

**2-(7-(diethylamino)-2-oxo-2H-chromen-3-yl)imidazo[1,2-a]pyrimidine-3-carbaldehyde (**5e**):** Yield 63%; orange powder; m.p. 263 – 264.5°C; RMN  $^1\text{H}$  (500 MHz,  $\text{CDCl}_3$ , 25 °C, TMS)  $\delta$  (ppm) = 10.43 (s, 1H,  $-\text{COH}$ ), 9.93 (dd,  $J$  (H,H) = 7, 2 Hz, 1H, Ar), 8.76 (d,  $J$  (H,H) = 2 Hz, 1H, Ar), 8.57 (s, 1H,  $-\text{CH}=\text{C}-$ ), 7.43 (d,  $J$  (H,H) = 9 Hz, 1H, Ar), 7.13 (m, 1H, Ar), 6.65 (dd,  $J$  (H,H) = 9, 2.5 Hz, 1H, Ar), 6.54 (sd,  $J$  (H,H) = 2.5 Hz, 1H, Ar), 3.48 (q,  $J$  (H,H) = 7 Hz, 4H,  $-\text{CH}_2-\text{CH}_3$ ), 1.26 (t,  $J$  (H,H) = 7 Hz, 6H,  $\text{CH}_3$ ); RMN  $^{13}\text{C}$  (125 MHz,  $\text{CDCl}_3$ , 25 °C, TMS)  $\delta$  (ppm) = 182.8, 161.7, 157.7, 154.2, 152.3, 151.7, 150.4, 147.0, 136.9, 130.8, 119.3, 112.3, 111.3, 110.1, 109.2, 97.2, 45.3, 12.8. FT-IR (KBr)  $\nu_{\text{max}}$  = 2700  $\text{cm}^{-1}$  ( $\text{H}-\text{C}=\text{O}$ ), 1714  $\text{cm}^{-1}$  ( $\text{C}=\text{O}$  lactone), 1618  $\text{cm}^{-1}$  ( $\text{H}-\text{C}=\text{O}$ ); UV-Vis (MeOH)  $\lambda_{\text{max}}$  = 431 nm.

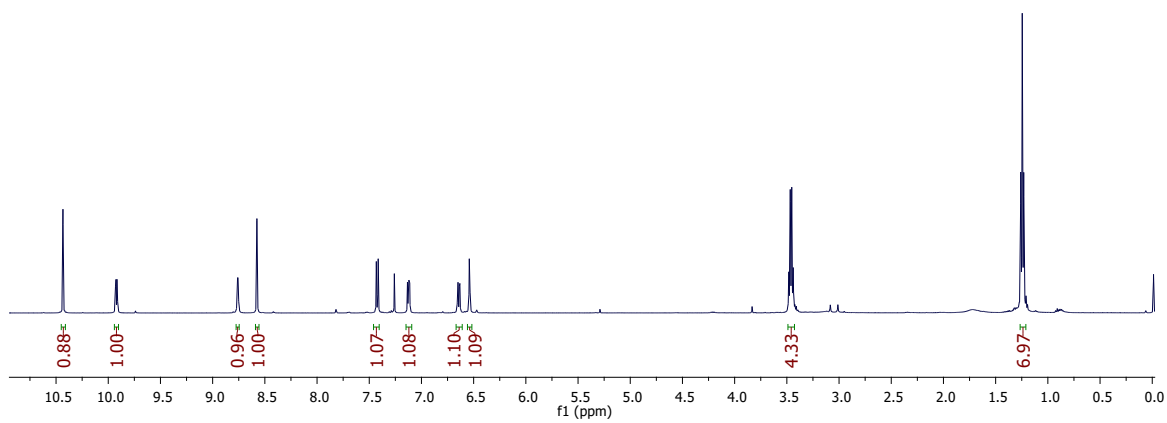

Figure SI-24. <sup>1</sup>H NMR spectra of **5e** on CDCl<sub>3</sub> 500 MHz

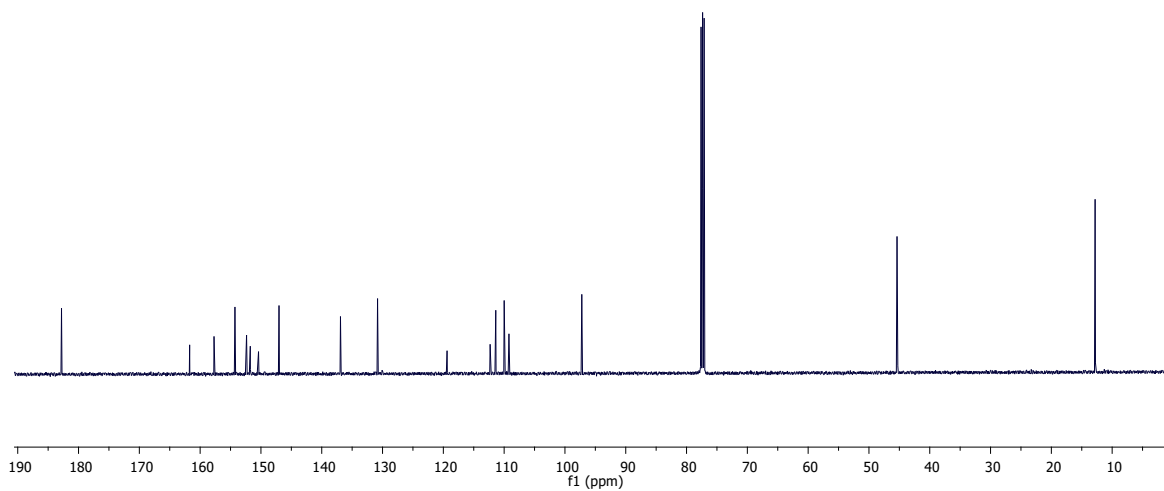

Figure SI-25. <sup>13</sup>C NMR spectra of **5e** on CDCl<sub>3</sub> 125 MHz.

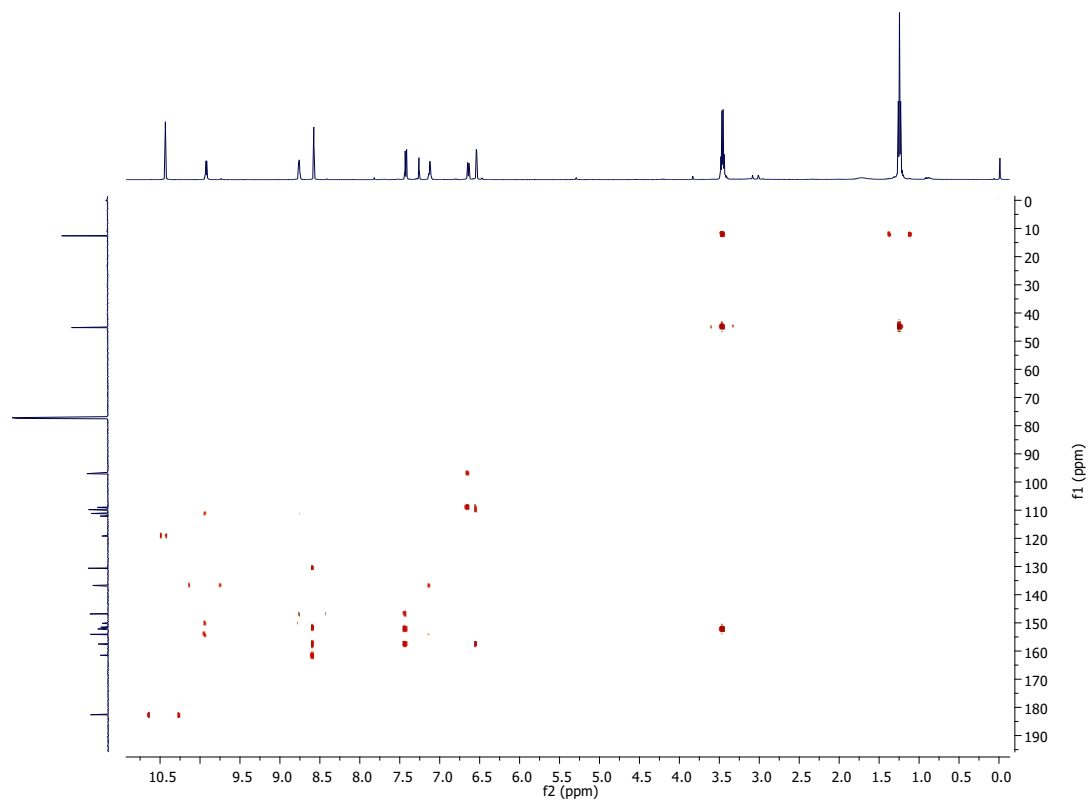

**Figure SI-26.** HMBC NMR spectra of **5e** on  $\text{CDCl}_3$

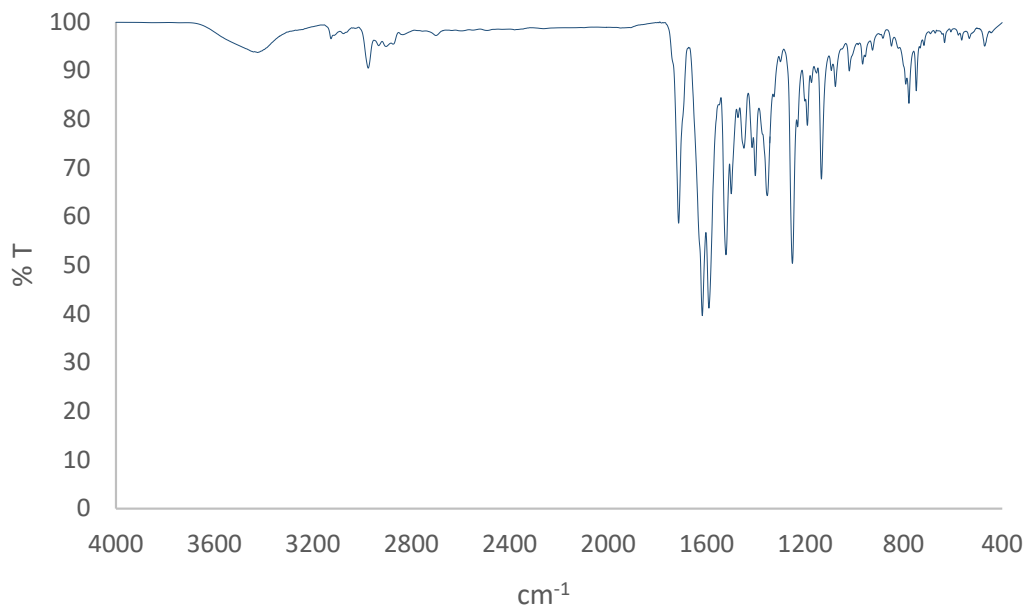

**Figure SI-27.** IR spectra for **5e** in KBr.

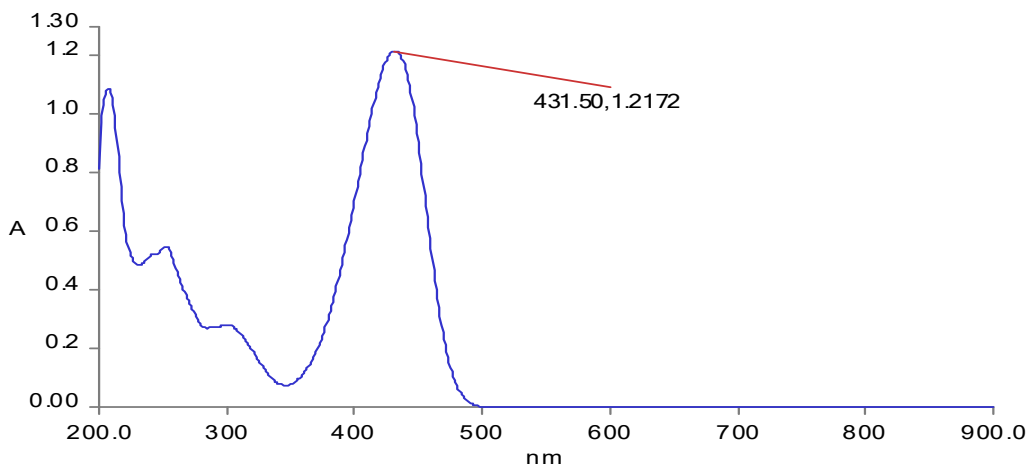

Figure SI-28. UV-Vis spectra of **5e** in MeOH.

#### 4. General procedure for 3-bromo-2-(cumarin-3-yl)imidazo[1,2-*a*]pyridine derivatives **6a-h**

In a 15 mL round bottom flask, **4a-h** derivatives (0.6 mmol) and acetic acid was added (4 mL), the solution was maintained in agitation and heating at 50 °C for 5 minutes. Later, Br<sub>2</sub> were added (0.7 mmol) and a brown precipitate was generated. The solid was filtered, dissolved in dichloromethane and washed with a saturated solution of NaHCO<sub>3</sub>. The organic phase was concentrated and purified by chromatographic column in Hex/AcOEt 80:20 elution system.

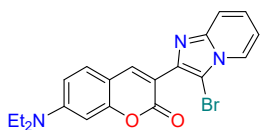

**3-(3-bromoimidazo[1,2-*a*]pyridin-2-yl)-7-(diethylamino)-2H-chromen-2-one (6a)**: Yield 97%; yellow powder; m.p. = 160 – 163 °C; RMN <sup>1</sup>H (500 MHz, CDCl<sub>3</sub>, 25 °C, TMS) δ (ppm) = 8.155 (d, *J* (H,H) = 8 Hz, 1H, Ar), 8.029 (s, 1H,  $\text{--CH=C--}$ ), 7.625 (d, *J* (H,H) = 7.5 Hz, 1H, Ar), 7.339 (d, *J* (H,H) = 7 Hz, 1H, Ar), 7.25 (t, *J* (H,H) = 7 Hz, 1H, Ar), 6.932 (t, *J* (H,H) = 7 Hz, 1H, Ar), 6.604 (d, *J* (H,H) = 9 Hz, 1H, Ar), 6.535 (s, 1H, Ar), 3.427 (q, *J* (H,H) = 7 Hz, 4H,  $\text{--CH}_2\text{--CH}_3$ ), 1.221 (t, *J* (H,H) = 7 Hz, 6H,  $\text{CH}_3$ ), RMN <sup>13</sup>C (125 MHz, CDCl<sub>3</sub>, 25 °C, TMS) δ (ppm) = 160.128, 156.883, 151.098, 145.350, 144.370, 139.570, 129.495, 125.103, 123.997, 117.613, 113.432, 113.196, 109.111, 108.688, 97.151, 44.935, 12.522; FT-IR (KBr)  $\nu_{\text{max}}$  = 3027 cm<sup>-1</sup> (C–H Ar), 2968 cm<sup>-1</sup> (C–H Aliphatic), 1711 cm<sup>-1</sup> (C=O lactone), 1598 cm<sup>-1</sup> (C=C Ar); UV–Vis (MeOH)  $\lambda_{\text{max}}$  = 402.41 nm; HRMS (ESI m/z) Calcd. for C<sub>20</sub>H<sub>19</sub>BrN<sub>3</sub>O<sub>2</sub> [M+H]<sup>+</sup> 412.0655, found 412.0640.

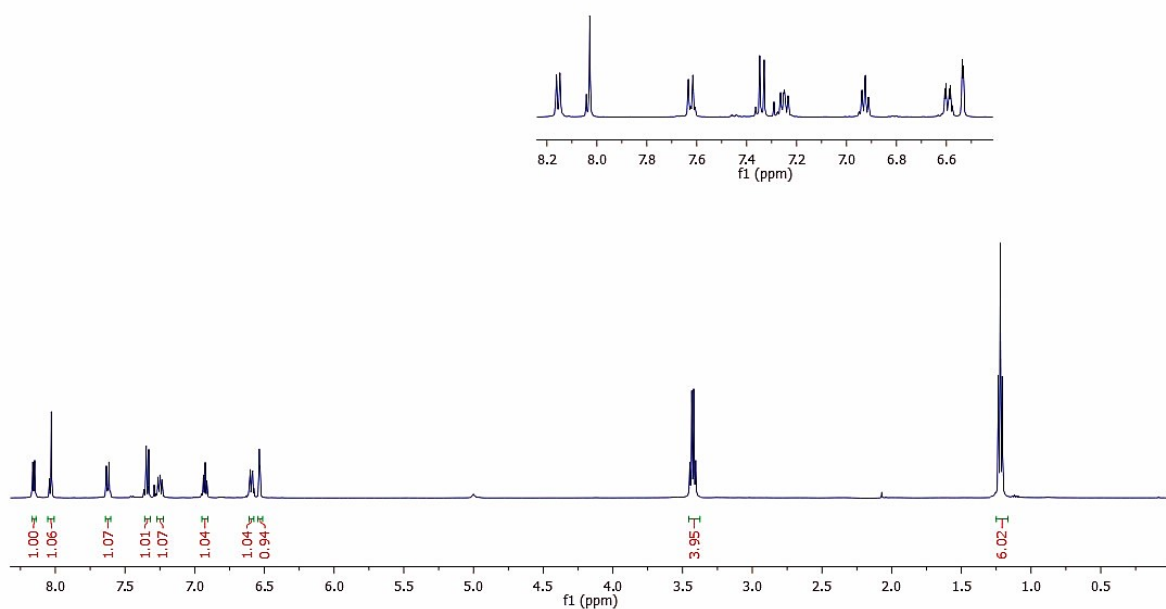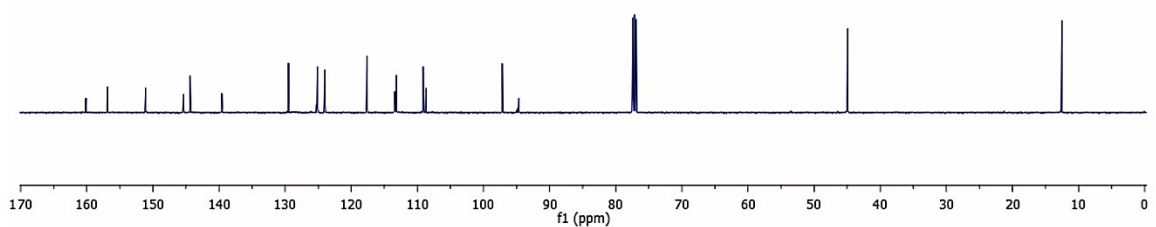

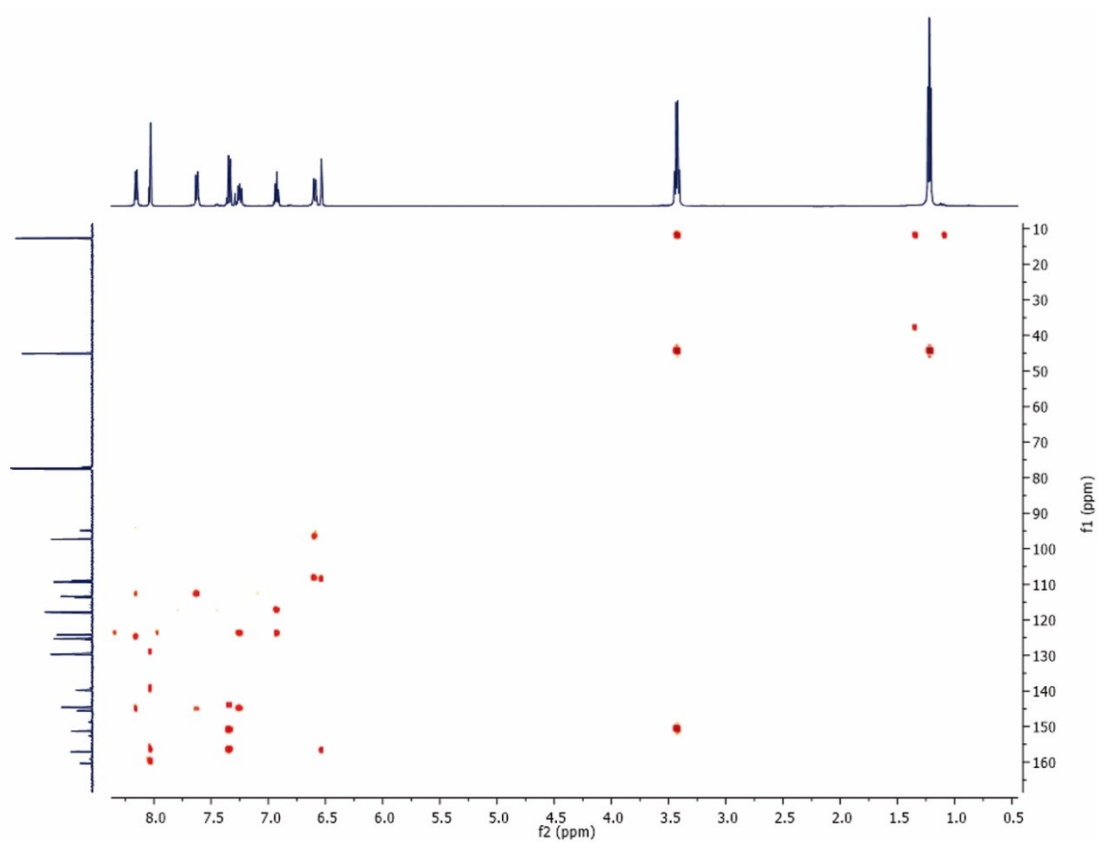

Figure SI-31. HMBC NMR spectra of **6a** on  $\text{CDCl}_3$

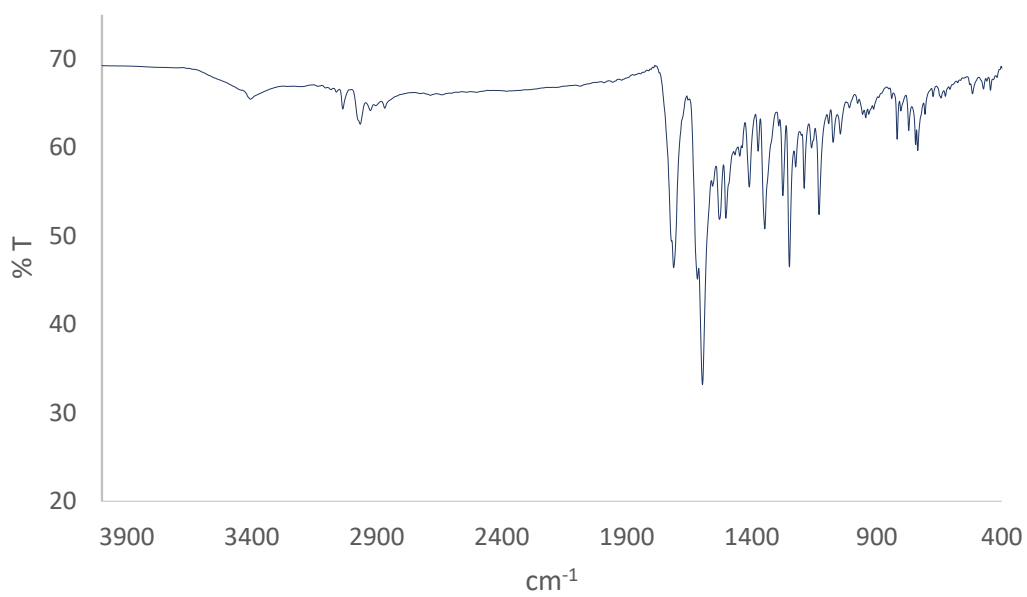

Figure SI-32. IR spectra for **6a** in KBr.

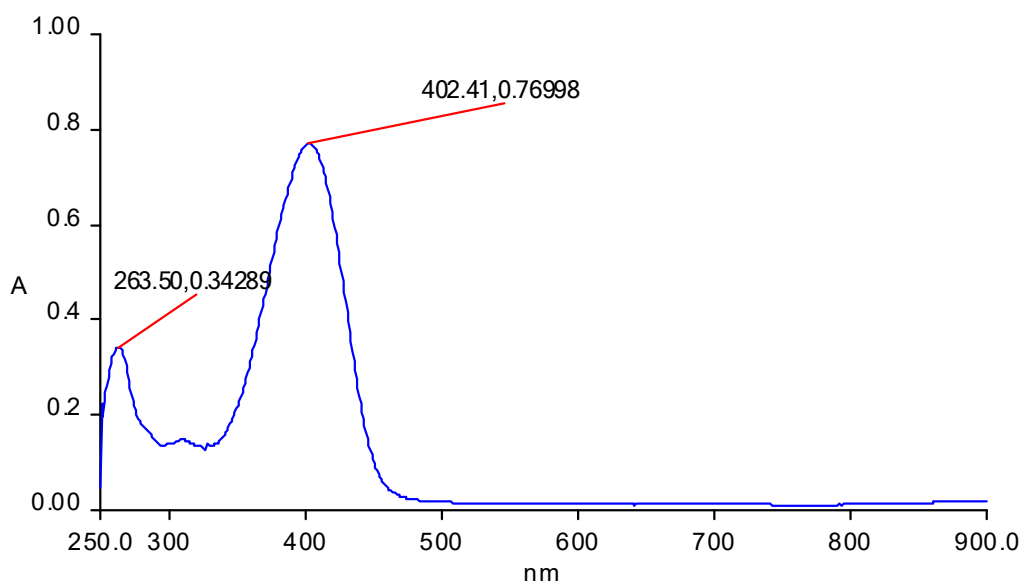

Figure SI-33. UV-Vis spectra of **6a** in MeOH.

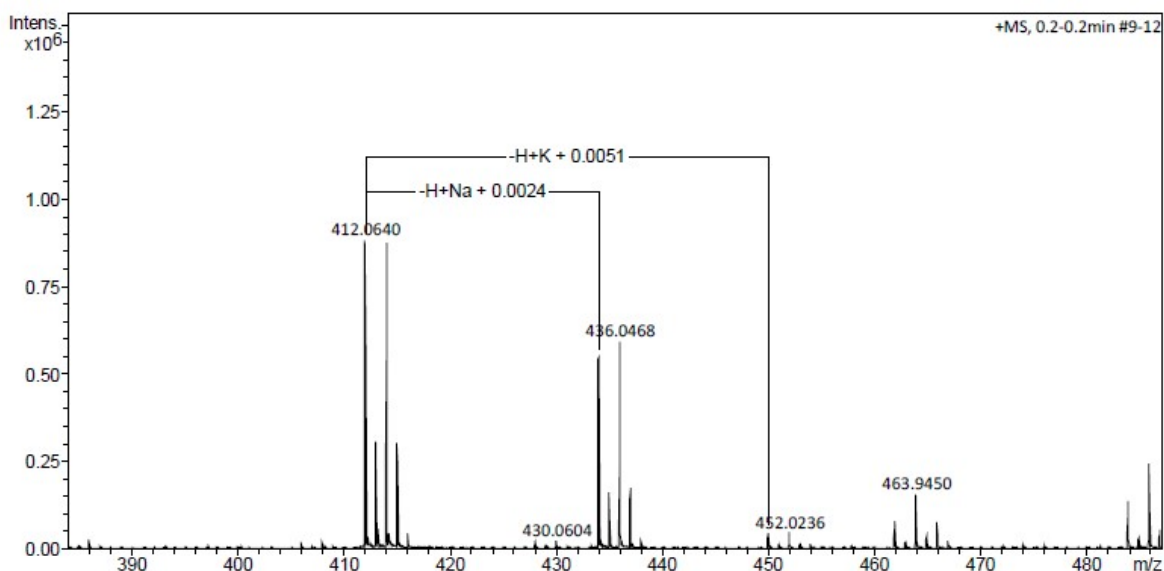

Figure SI-34. ESI-MS chromatogram of **6a**.

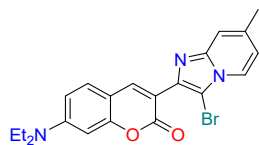

**3-(3-bromo-7-methylimidazo[1,2-a]pyridin-2-yl)-7-(diethylamino)-2H-chromen-2-one (6b):** Yield 95%; yellow powder; m.p. = 171 – 174 °C; RMN <sup>1</sup>H (500 MHz, CDCl<sub>3</sub>, 25 °C, TMS) δ (ppm) = 8.004 – 7.988 (m, 2H, Ar), 7.335 – 7.297 (m, 2H, Ar), 6.726 (d, *J* (H,H) = 7 Hz, 1H, Ar), 6.576 (d, *J* (H,H) = 9 Hz, 1H, Ar), 6.509 (s, 1H, Ar), 3.407 (q, *J* (H,H) = 7 Hz, 4H, –CH<sub>2</sub>–CH<sub>3</sub>), 2.396 (s, 3H, CH<sub>3</sub>), 1.194 (t, *J* (H,H) = 7 Hz, 6H, CH<sub>3</sub>); RMN <sup>13</sup>C (125 MHz, CDCl<sub>3</sub>, 25 °C, TMS) δ (ppm) = 160.116, 0156.874, 151.064, 145.778, 144.159, 139.287, 136.121, 129.449, 123.179, 116.035, 115.786, 113.825, 109.101, 108.804, 97.238, 93.792, 44.946, 21.409, 12.556; FT-IR (KBr) ν<sub>max</sub> = 3079 cm<sup>-1</sup> (C–H Ar), 2925 cm<sup>-1</sup> (C–H Aliphatic), 1723 cm<sup>-1</sup> (C=O lactone), 1608 cm<sup>-1</sup> (C=C Ar); UV-Vis (MeOH) λ<sub>max</sub> = 406.16 nm; HRMS (ESI m/z) Calcd. for C<sub>21</sub>H<sub>21</sub>BrN<sub>3</sub>O<sub>2</sub> [M+H]<sup>+</sup> 426.0812, found 426.0844.

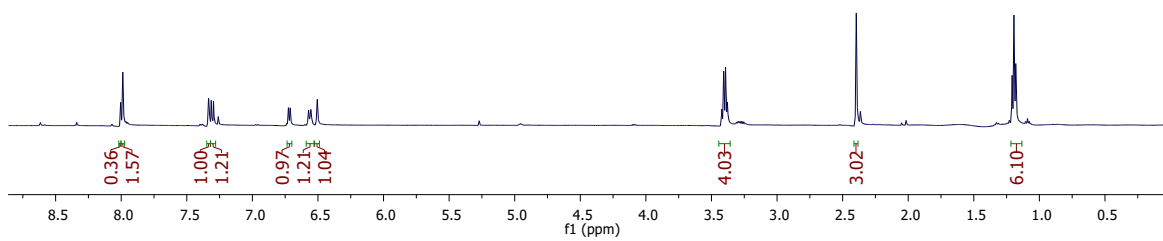

Figure SI-35. <sup>1</sup>H NMR spectra of **6b** on CDCl<sub>3</sub> 500 MHz

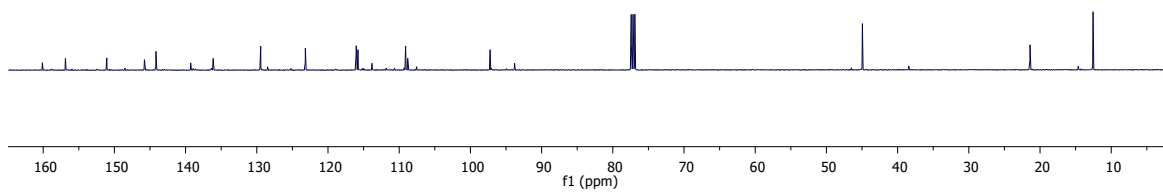

Figure SI-36. <sup>13</sup>C NMR spectra of **6b** on CDCl<sub>3</sub> 125 MHz.



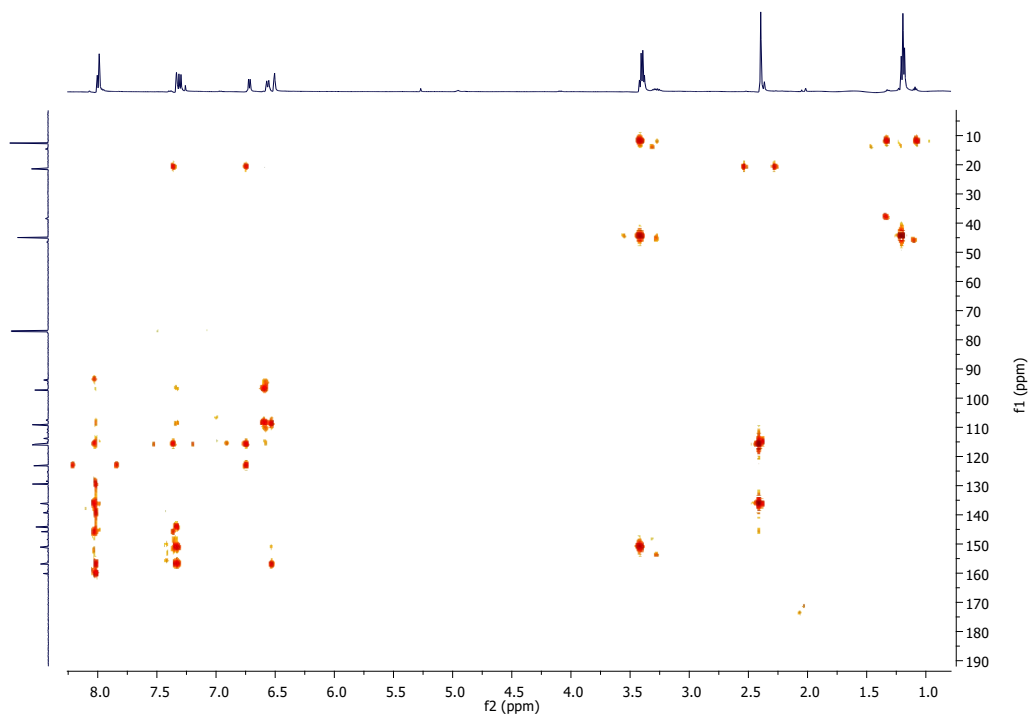

**Figure SI-37.** HMBC NMR spectra of **6b** on  $\text{CDCl}_3$

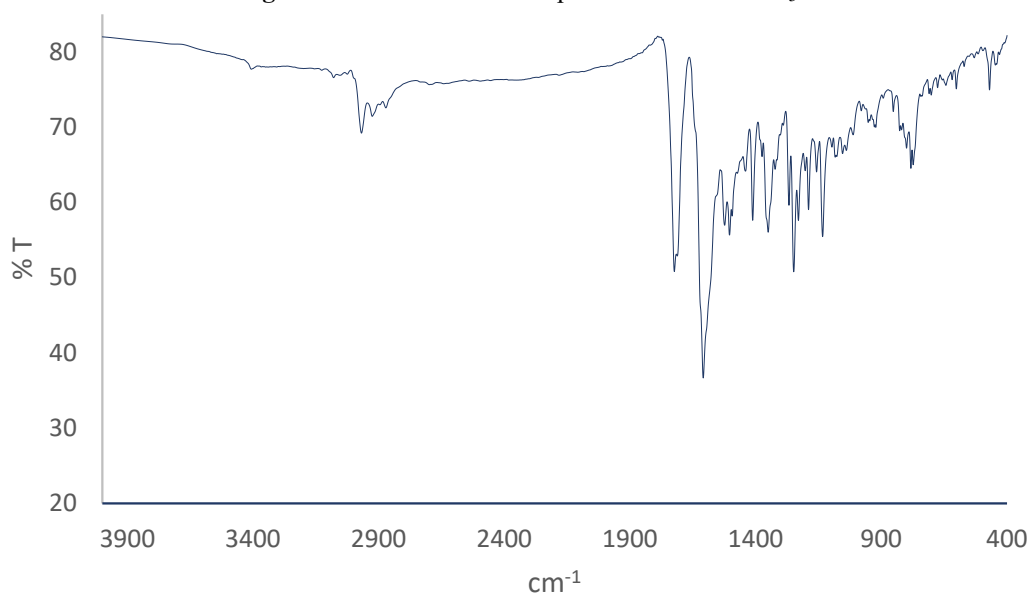

**Figure SI-38.** IR spectra for **6b** in KBr.

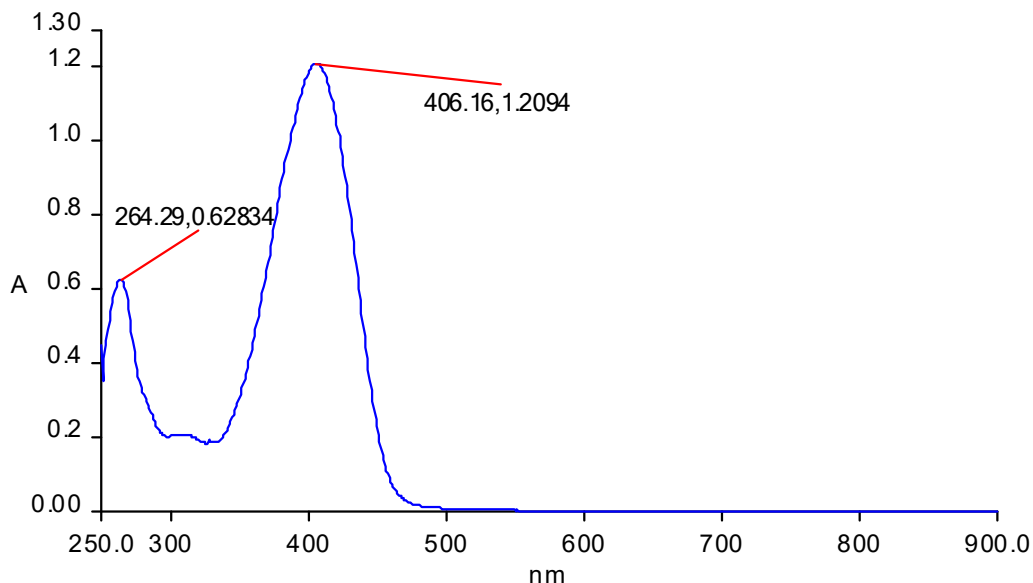

Figure SI-39. UV-Vis spectra of **6b** in MeOH.

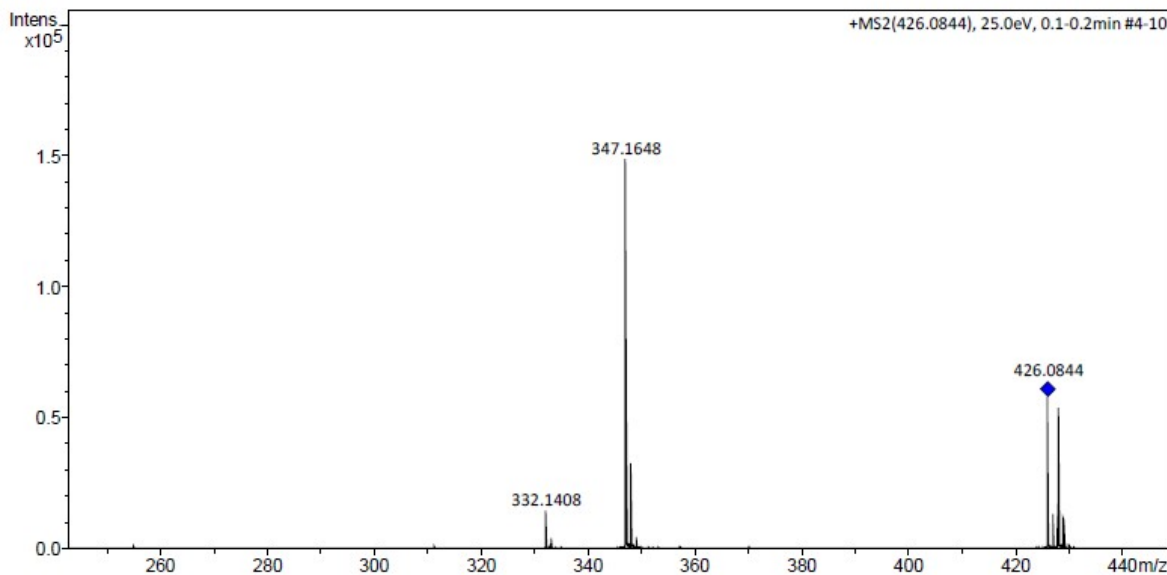

Figure SI-40. ESI-MS chromatogram of **6b**.

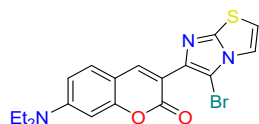

**3-(5-bromoimidazo[2,1-b]thiazol-6-yl)-7-(diethylamino)-2H-chromen-2-one (6c):** Yield 80%; yellow powder; m.p. = 140 – 142 °C; RMN  $^1\text{H}$  (500 MHz,  $\text{CDCl}_3$ , 25 °C, TMS)  $\delta$  (ppm) = 7.886 (s, 1H,  $-\text{CH}=\text{C}-$ ), 7.352 (d,  $J$  (H,H) = 4.5 Hz, 1H,  $-\text{CH}=\text{C}-$ ), 7.276 (d,  $J$  (H,H) = 9 Hz, 1H, Ar), 6.889 (d,  $J$  (H,H) = 4.5 Hz, 1H,  $-\text{CH}=\text{C}-$ ), 6.547 (d,  $J$  (H,H) = 9 Hz, 1H, Ar), 6.473 (s, 1H, Ar), 3.380 (q,  $J$  (H,H) = 7.5 Hz, 4H,  $-\text{CH}_2-\text{CH}_3$ ), 1.174 (t,  $J$  (H,H) = 7.5 Hz, 6H,  $\text{CH}_3$ ); RMN  $^{13}\text{C}$  (125 MHz,  $\text{CDCl}_3$ , 25 °C, TMS)  $\delta$  (ppm) = 160.075, 156.649, 150.957, 148.642, 143.399, 140.435, 129.312, 117.579, 113.499, 113.250, 109.089, 108.600, 97.132, 93.159, 44.884, 12.488; FT-IR (KBr)  $\nu_{\text{max}}$  = 3089  $\text{cm}^{-1}$  (C–H Ar), 2928  $\text{cm}^{-1}$  (C–H Aliphatic), 1719  $\text{cm}^{-1}$  (C=O lactone), 1605  $\text{cm}^{-1}$  (C=C Ar); UV-Vis (MeOH)  $\lambda_{\text{max}}$  = 404.87 nm; HRMS (ESI m/z) Calcd. for  $\text{C}_{18}\text{H}_{17}\text{BrN}_3\text{O}_2\text{S}$   $[\text{M}+\text{H}]^+$  418.0219, found 418.0150.

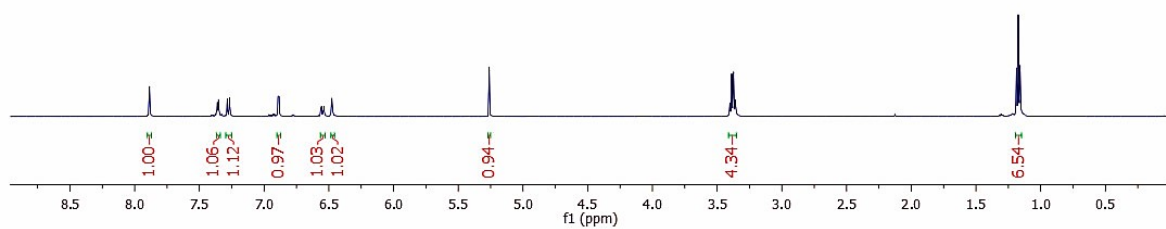

Figure SI-41.  $^1\text{H}$  NMR spectra of **6c** on  $\text{CDCl}_3$  500 MHz

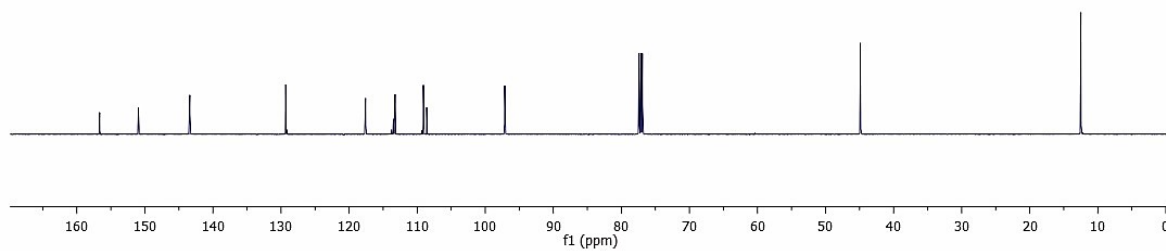

Figure SI-42.  $^{13}\text{C}$  NMR spectra of **6c** on  $\text{CDCl}_3$  125 MHz.

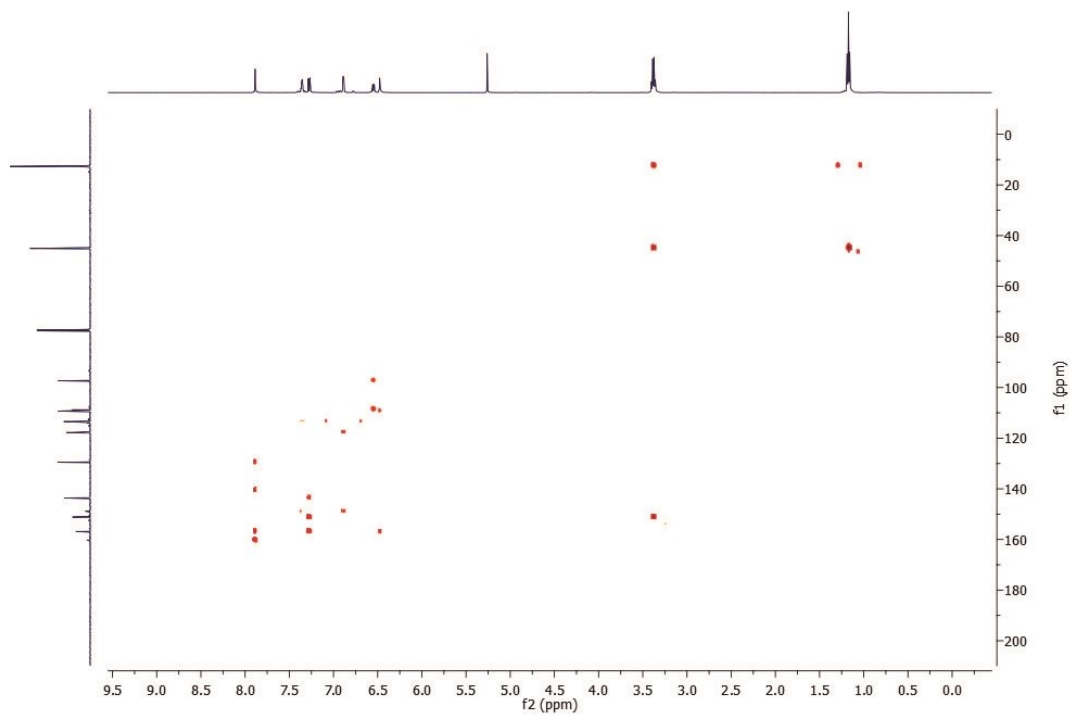

**Figure SI-43.** HMBC NMR spectra of **6c** on  $\text{CDCl}_3$

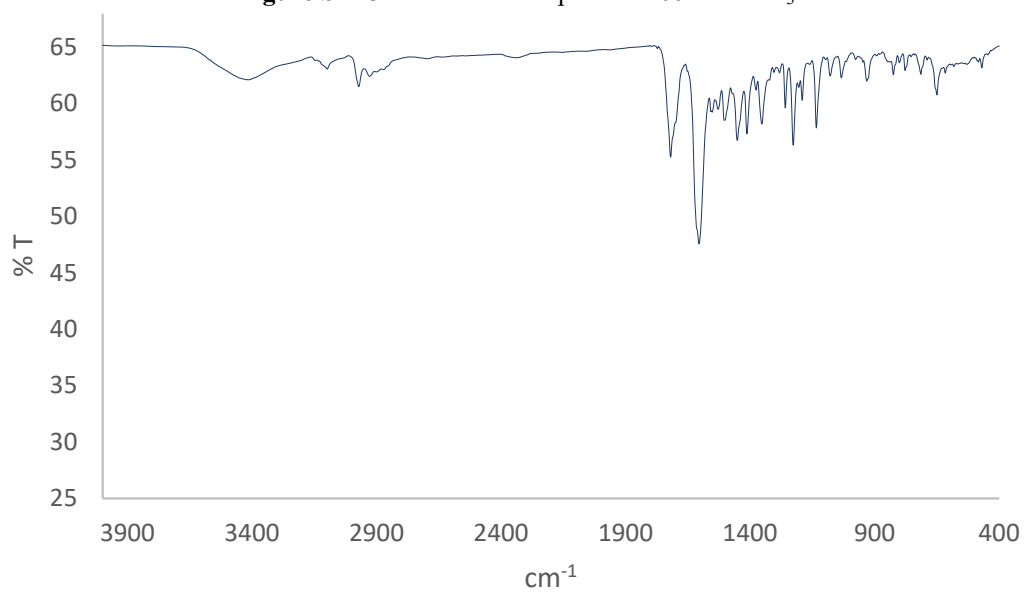

**Figure SI-44.** IR spectra for **6c** in KBr.

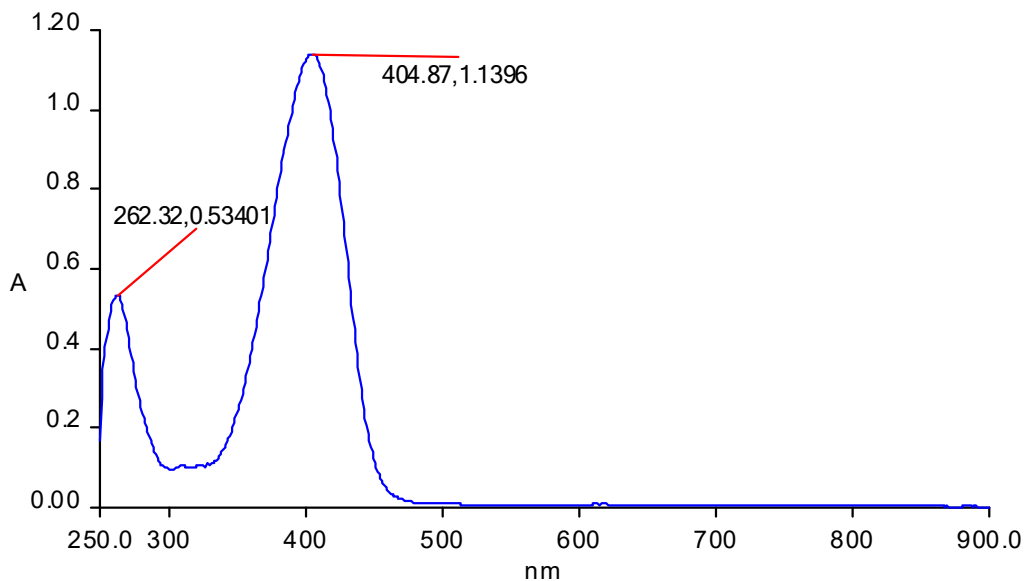

Figure SI-45. UV-Vis spectra of **6c** in MeOH.

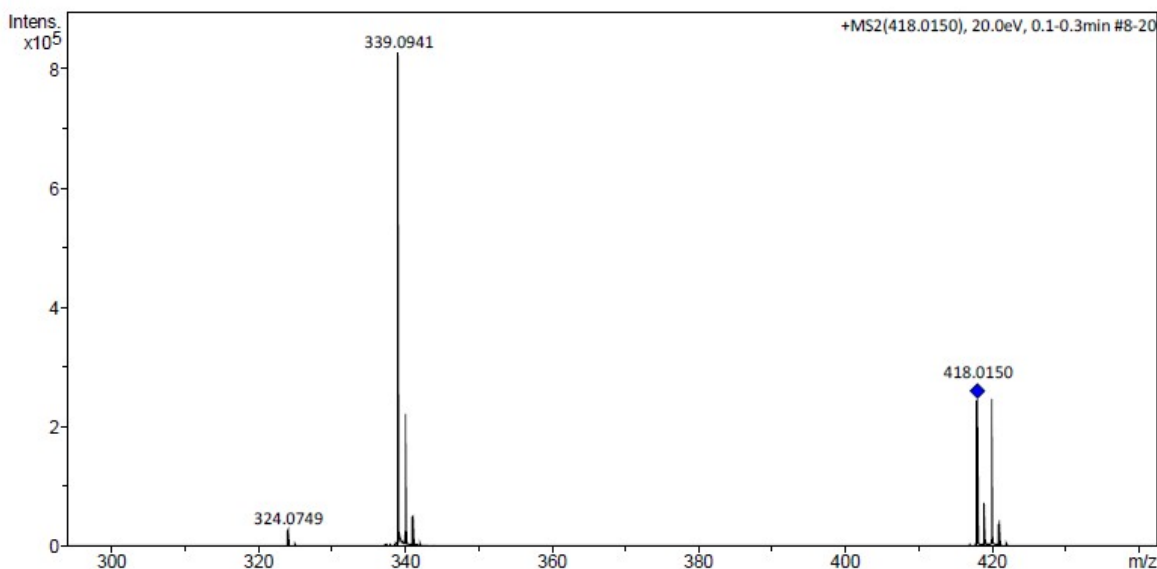

Figure SI-46. ESI-MS chromatogram of **6c**.

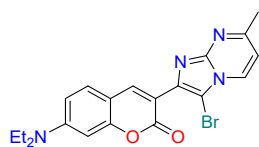

**3-(3-bromo-7-methylimidazo[1,2-a]pyrimidin-2-yl)-7-(diethylamino)-2H-chromen-2-one (6d)**: Yield 92%; yellow powder; m.p. = 218 – 220 °C; RMN  $^1\text{H}$  (500 MHz,  $\text{CDCl}_3$ , 25 °C, TMS)  $\delta$  (ppm) = 8.269 (d,  $J$  (H,H) = 7 Hz, 1H, Ar), 8.144 (s, 1H,  $-\text{CH}=\text{C}-$ ), 7.310 (d,  $J$  (H,H) = 9 Hz, 1H, Ar), 6.574 (d,  $J$  (H,H) = 7 Hz, 1H, Ar), 6.558 (d,  $J$  (H,H) = 9 Hz, 1H, Ar), 6.476 (s, 1H, Ar), 3.394 (q,  $J$  (H,H) = 7.5 Hz, 4H,  $-\text{CH}_2-\text{CH}_3$ ), 2.619 (s, 3H,  $\text{CH}_3$ ), 1.184 (t,  $J$  (H,H) = 7.5 Hz, 6H,  $\text{CH}_3$ ); RMN  $^{13}\text{C}$  (125 MHz,  $\text{CDCl}_3$ , 25 °C, TMS)  $\delta$  (ppm) = 160.569, 159.694, 156.941, 151.218, 148.026, 144.926, 140.505, 130.778, 129.712, 113.245, 110.340, 108.852, 97.078, 92.515, 44.949, 24.963, 12.527; FT-IR (KBr)  $\nu_{\text{max}}$  = 3083  $\text{cm}^{-1}$  (C–H Ar), 2972  $\text{cm}^{-1}$  (C–H Aliphatic), 1711  $\text{cm}^{-1}$  (C=O lactone), 1620  $\text{cm}^{-1}$  (C=C Ar); UV-Vis (MeOH)  $\lambda_{\text{max}}$  = 423.00 nm; HRMS (ESI m/z) Calcd. for  $\text{C}_{20}\text{H}_{20}\text{BrN}_4\text{O}_2$   $[\text{M}+\text{H}]^+$  427.0764, found 427.0769.

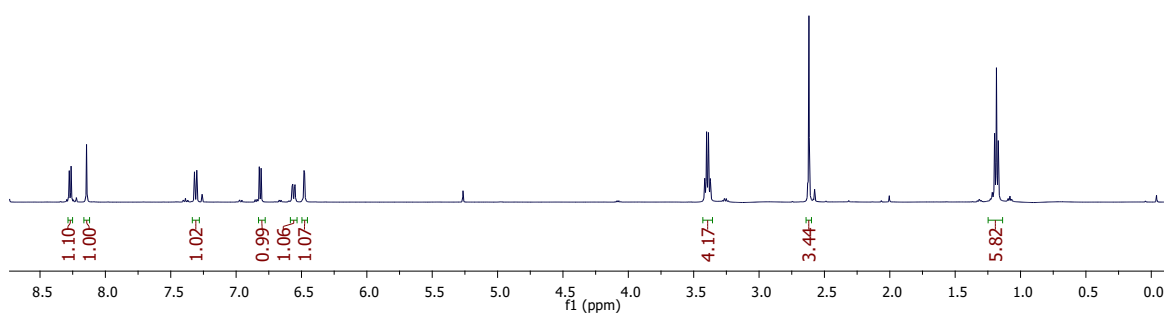

**Figure SI-47.** <sup>1</sup>H NMR spectra of **6d** on CDCl<sub>3</sub> 500 MHz

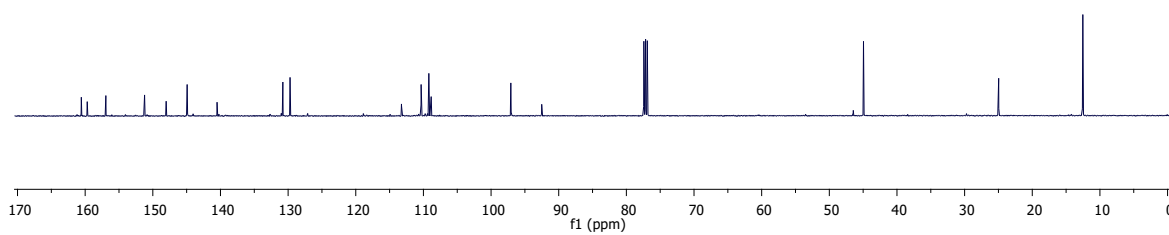

**Figure SI-48.** <sup>13</sup>C NMR spectra of **6d** on CDCl<sub>3</sub> 125 MHz.

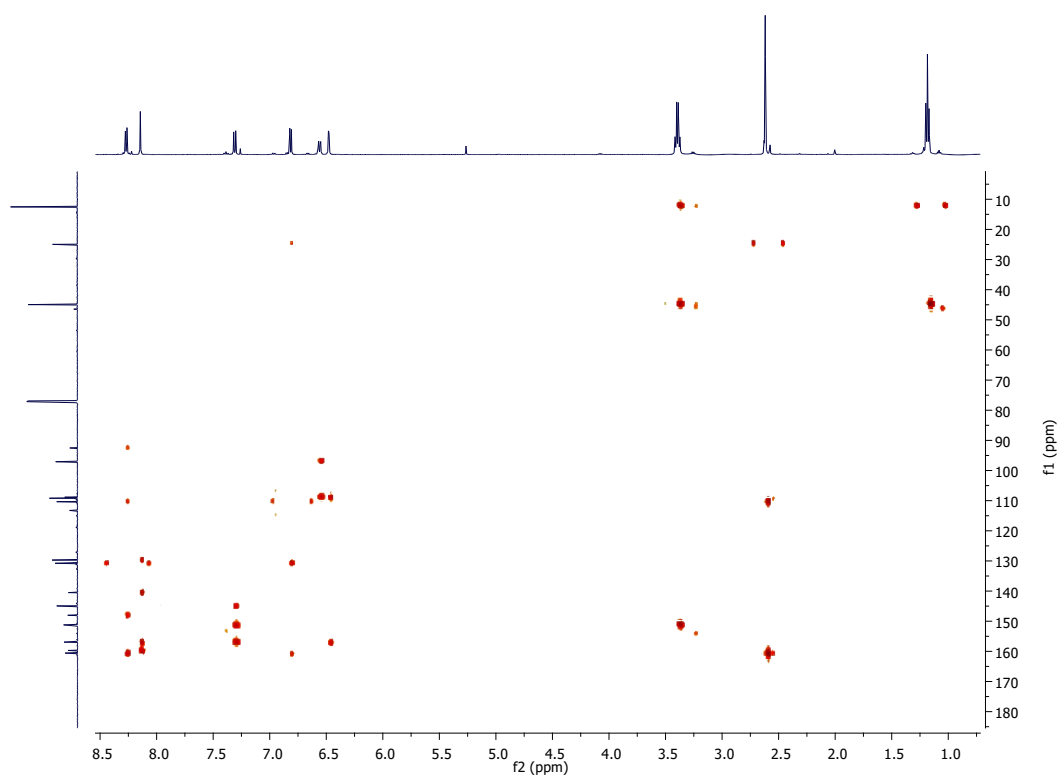

**Figure SI-49.** HMBC NMR spectra of **6d** on  $\text{CDCl}_3$

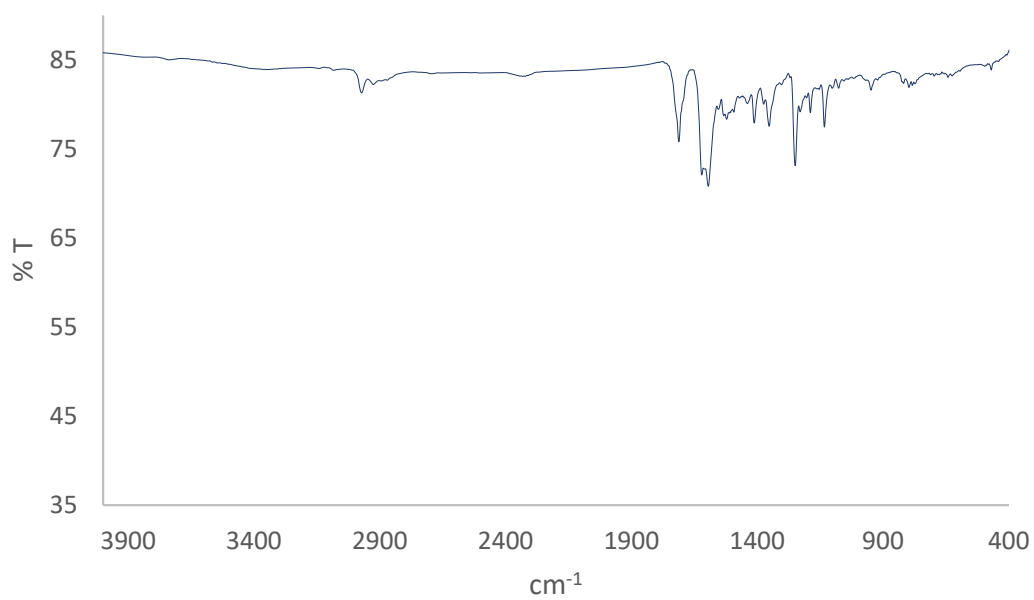

**Figure SI-50.** IR spectra for **6d** in KBr.

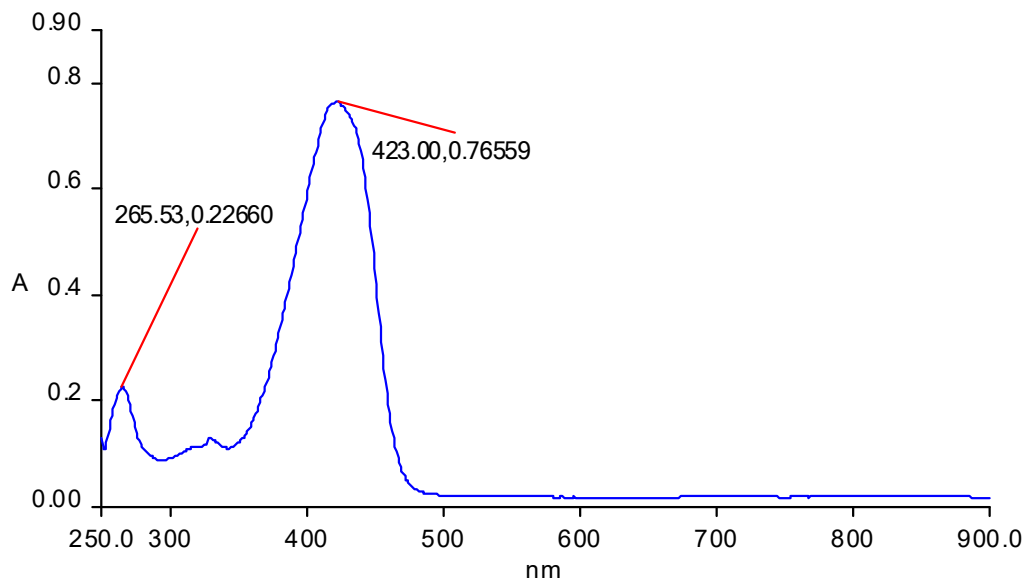

Figure SI-51. UV-Vis spectra of **6d** in MeOH.

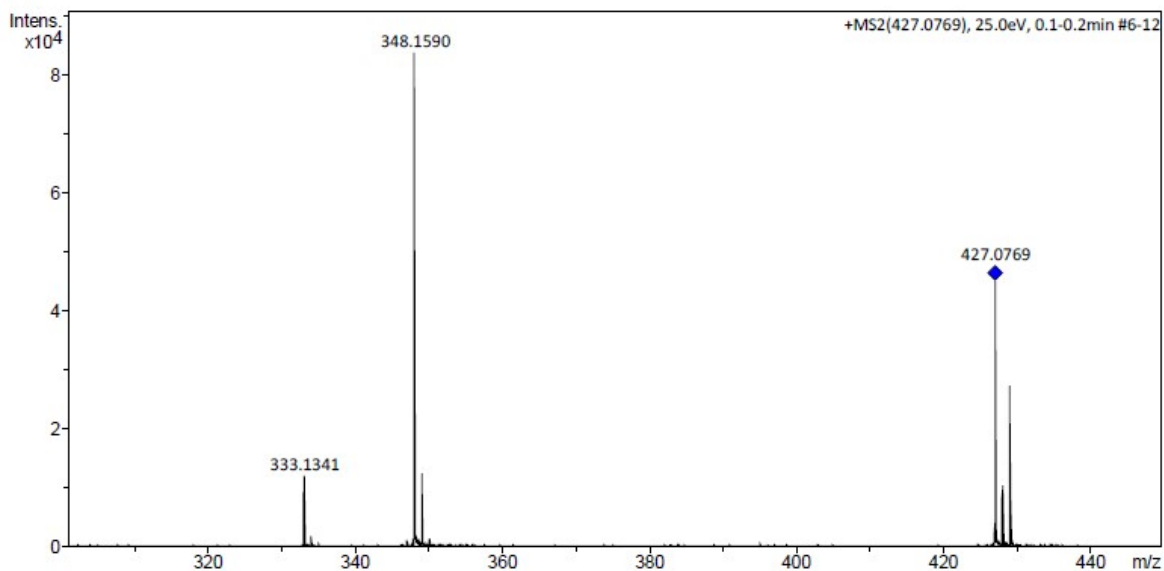

Figure SI-52. ESI-MS chromatogram of **6d**.

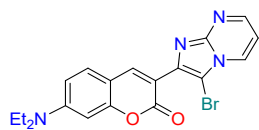

**3-(3-bromoimidazo[1,2-a]pyrimidin-2-yl)-7-(diethylamino)-2H-chromen-2-one (6e):** Yield 81%; yellow powder; m.p. = 121 – 125 °C; RMN <sup>1</sup>H (500 MHz, CDCl<sub>3</sub>, 25 °C, TMS) δ (ppm) = 8.565 (d, *J* (H,H) = 4 Hz, 1H, Ar), 8.458 (d, *J* (H,H) = 6.5 Hz, 1H, Ar), 8.165 (s, 1H, –CH=C–), 7.338 (d, *J* (H,H) = 8.5 Hz, 1H, Ar), 7.000 (t, *J* (H,H) = 6 Hz, 1H, Ar), 6.581 (d, *J* (H,H) = 8.5 Hz, 1H, Ar), 6.501 (s, 1H, Ar), 3.415 (q, *J* (H,H) = 7.5 Hz, 4H, –CH<sub>2</sub>–CH<sub>3</sub>), 1.203 (t, *J* (H,H) = 7.5 Hz, 6H, CH<sub>3</sub>); RMN <sup>13</sup>C (125 MHz, CDCl<sub>3</sub>, 25 °C, TMS) δ (ppm) = 159.756, 157.059, 151.376, 150.348, 147.958, 145.349, 141.283, 131.542, 129.859, 112.617, 109.566, 109.302, 108.753, 97.066, 93.628, 45.006, 12.338; FT-IR (KBr) ν<sub>max</sub> = 3085 cm<sup>-1</sup> (C–H Ar), 2971 cm<sup>-1</sup> (C–H



Aliphatic), 1717  $\text{cm}^{-1}$  (C=O lactone), 1598  $\text{cm}^{-1}$  (C=C Ar); UV-Vis (MeOH)  $\lambda_{\text{max}} = 408.14 \text{ nm}$ ; HRMS (ESI  $m/z$ ) Calcd. for  $\text{C}_{19}\text{H}_{18}\text{BrN}_4\text{O}_2$   $[\text{M}+\text{H}]^+$  413.0608, found 413.0614.

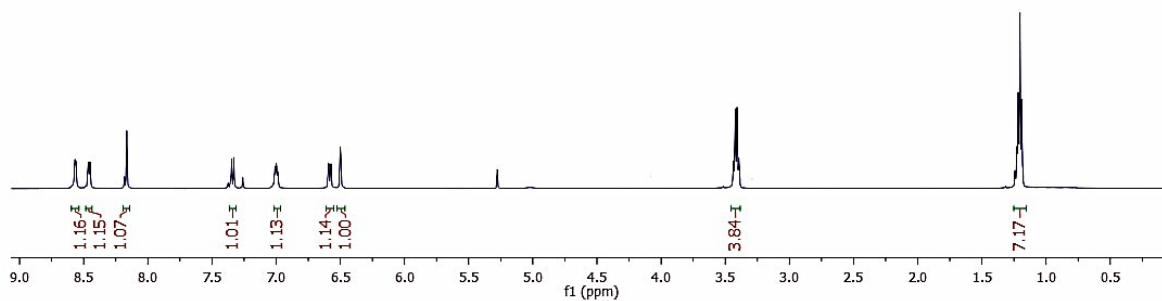

Figure SI-53.  $^1\text{H}$  NMR spectra of **6e** on  $\text{CDCl}_3$  500 MHz

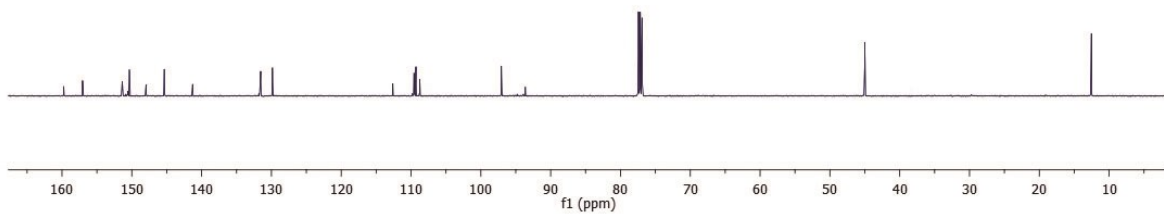

**Figure SI-54.**  $^{13}\text{C}$  NMR spectra of **6e** on  $\text{CDCl}_3$  125 MHz.

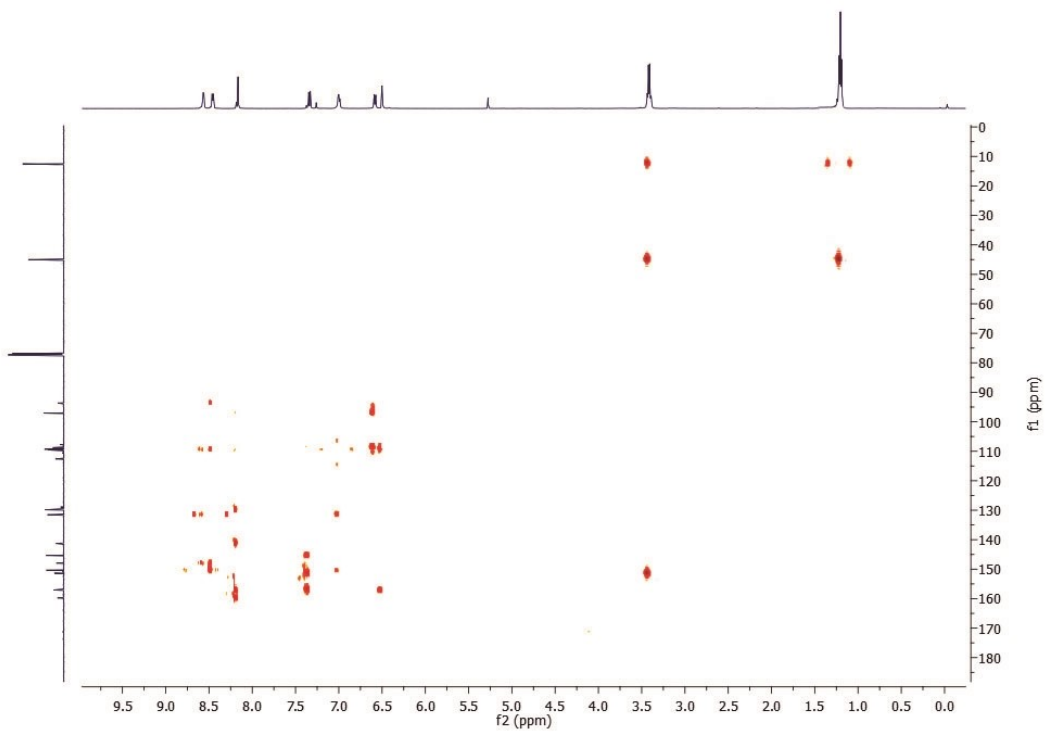

**Figure SI-55.** HMBC NMR spectra of **6e** on  $\text{CDCl}_3$

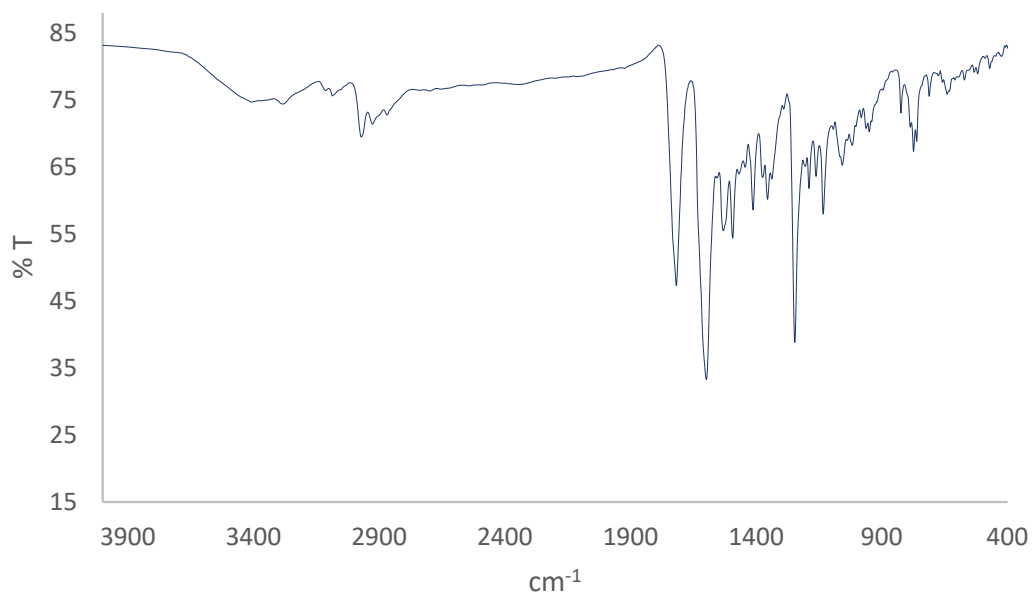

**Figure SI-56.** IR spectra for **6e** in KBr.

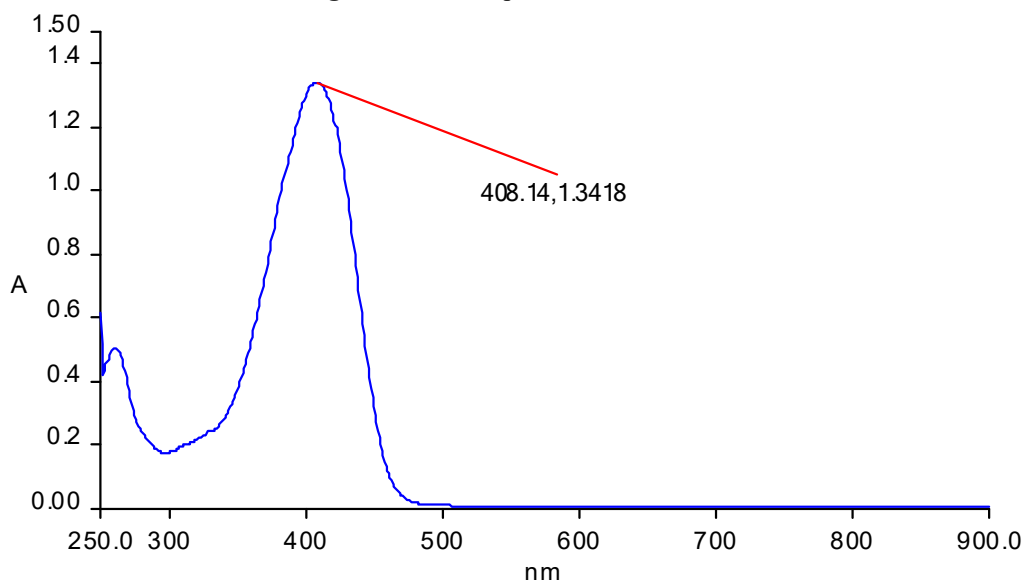

**Figure SI-57.** UV-Vis spectra of **6e** in MeOH.

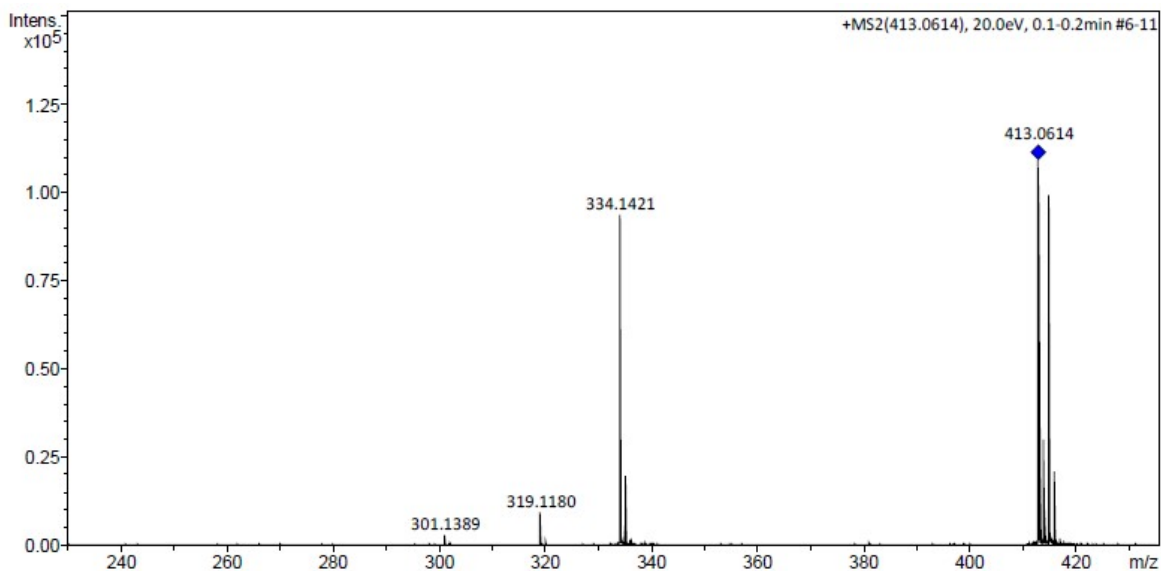

Figure SI-58. ESI-MS chromatogram of **6e**.

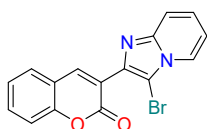

**3-(3-bromoimidazo[1,2-a]pyridin-2-yl)-2H-chromen-2-one (6f):** Yield 98%; brown powder; m.p. = 195 – 197 °C; RMN <sup>1</sup>H (500 MHz, CDCl<sub>3</sub>, 25 °C, TMS) δ (ppm) = 8.200 (m, 2H, Ar), 7.664 (d, *J* (H,H) = 7 Hz, 1H, Ar), 7.592 – 7.557 (m, 2H, Ar), 7.419 (d, *J* (H,H) = 9 Hz, 1H, Ar), 7.320 – 7.310 (m, 2H, Ar), 6.986 (t, *J* (H,H) = 7 Hz, 1H, Ar); RMN <sup>13</sup>C (125 MHz, CDCl<sub>3</sub>, 25 °C, TMS) δ (ppm) = 158.909, 154.018, 145.469, 143.842, 138.235, 132.138, 128.376, 125.639, 00, 124.156, 121.382, 119.166, 117.860, 116.691, 113.609, 95.432; FT-IR (KBr)  $\nu_{\text{max}}$  = 3040 cm<sup>-1</sup> (C–H Ar), 2922 cm<sup>-1</sup> (C–H Aliphatic), 1722 cm<sup>-1</sup> (C=O lactone), 1632 cm<sup>-1</sup> (C=C Ar); UV–Vis (MeOH)  $\lambda_{\text{max}}$  = 335.14 nm; HRMS (ESI m/z) Calcd. for C<sub>16</sub>H<sub>10</sub>BrN<sub>2</sub>O<sub>2</sub> [M+H]<sup>+</sup> 340.9920, found 340.9923.

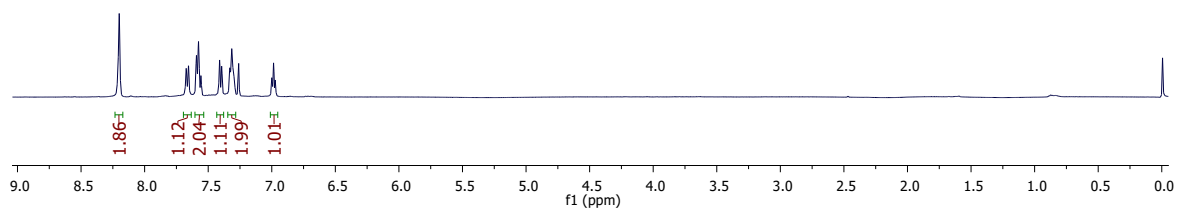

Figure SI-59.  $^1\text{H}$  NMR spectra of **6f** on  $\text{CDCl}_3$  500 MHz

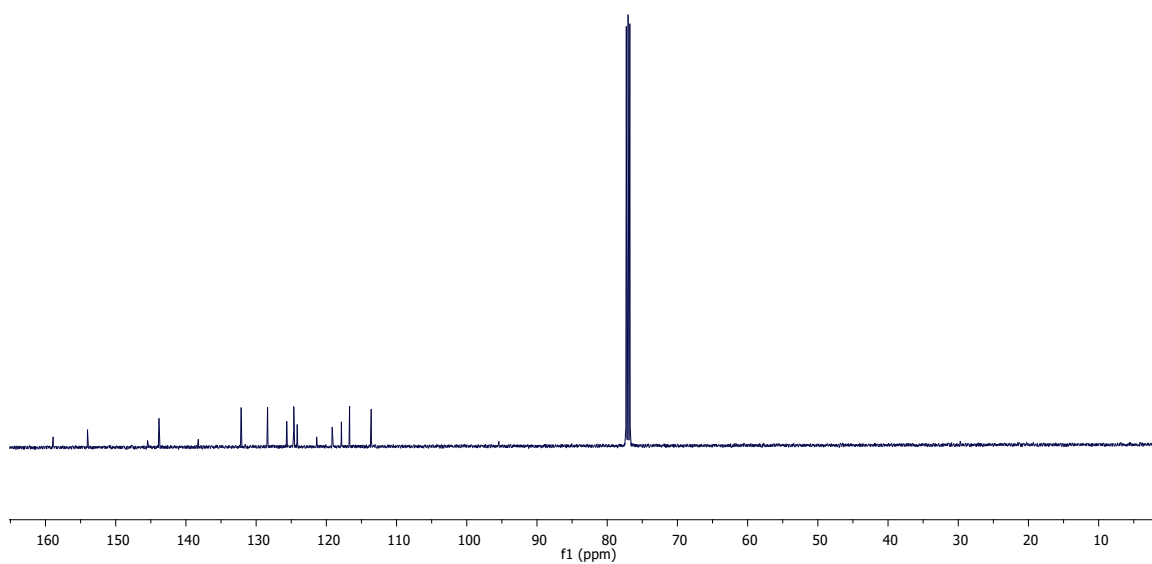

Figure SI-60.  $^{13}\text{C}$  NMR spectra of **6f** on  $\text{CDCl}_3$  125 MHz.

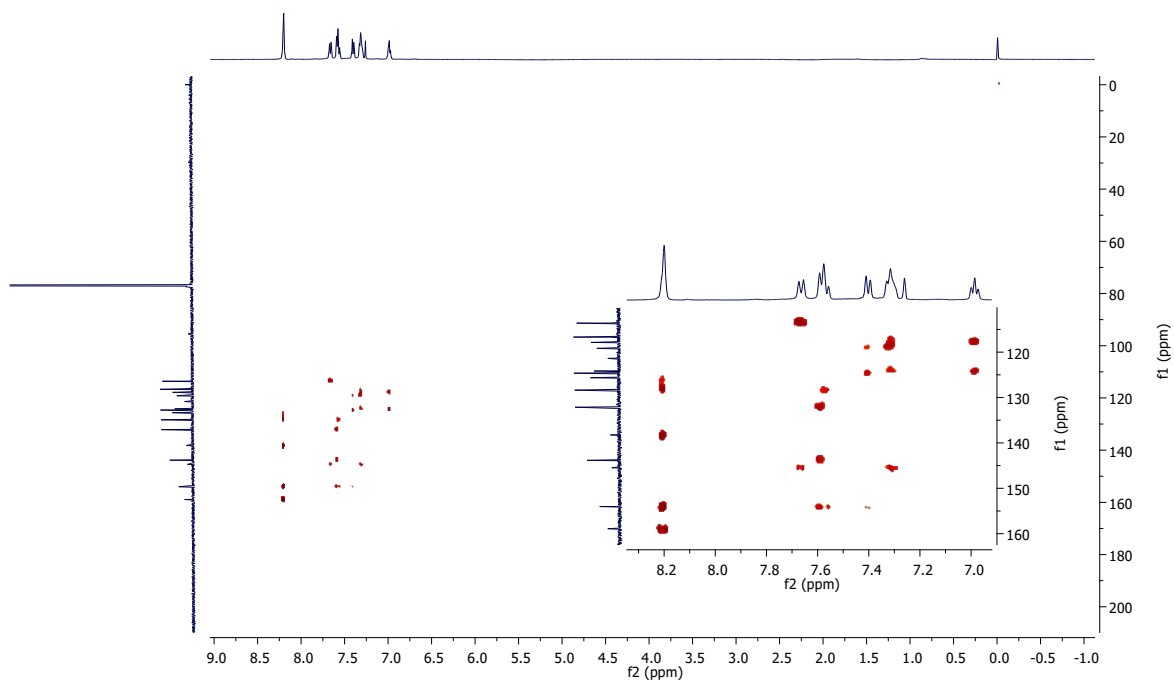

Figure SI-61. HMBC NMR spectra of **6f** on  $\text{CDCl}_3$

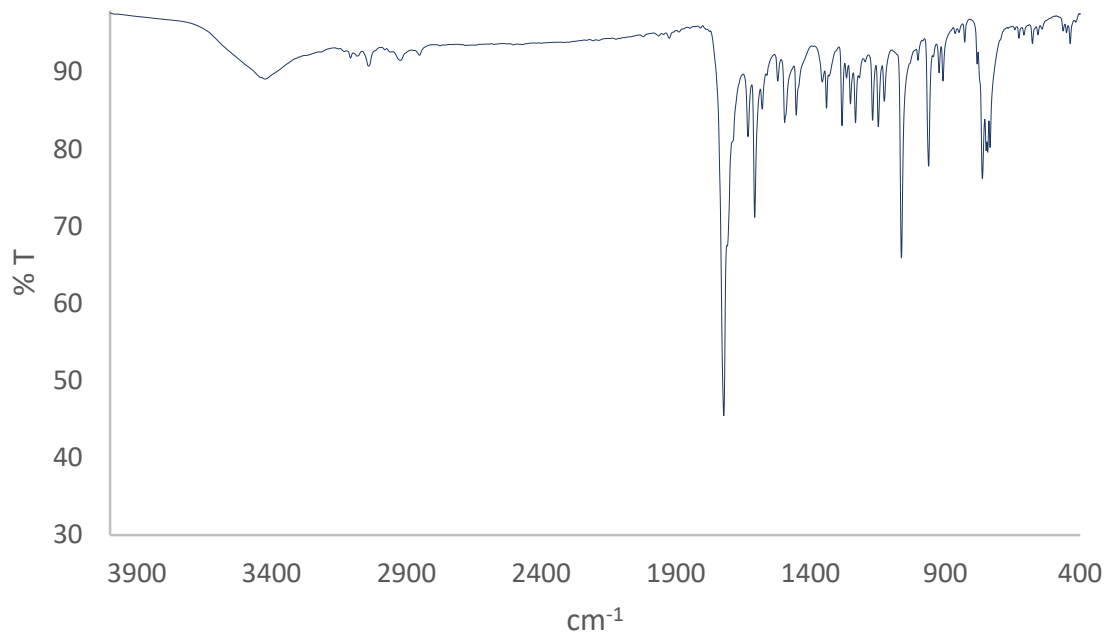

Figure SI-62. IR spectra for **6f** in KBr.

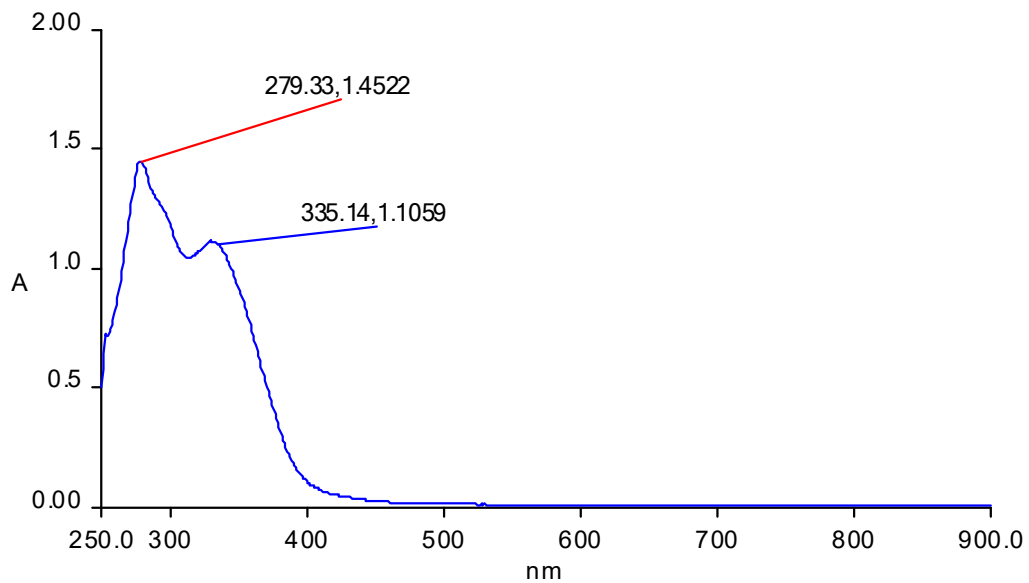

Figure SI-63. UV-Vis spectra of 6f in MeOH.

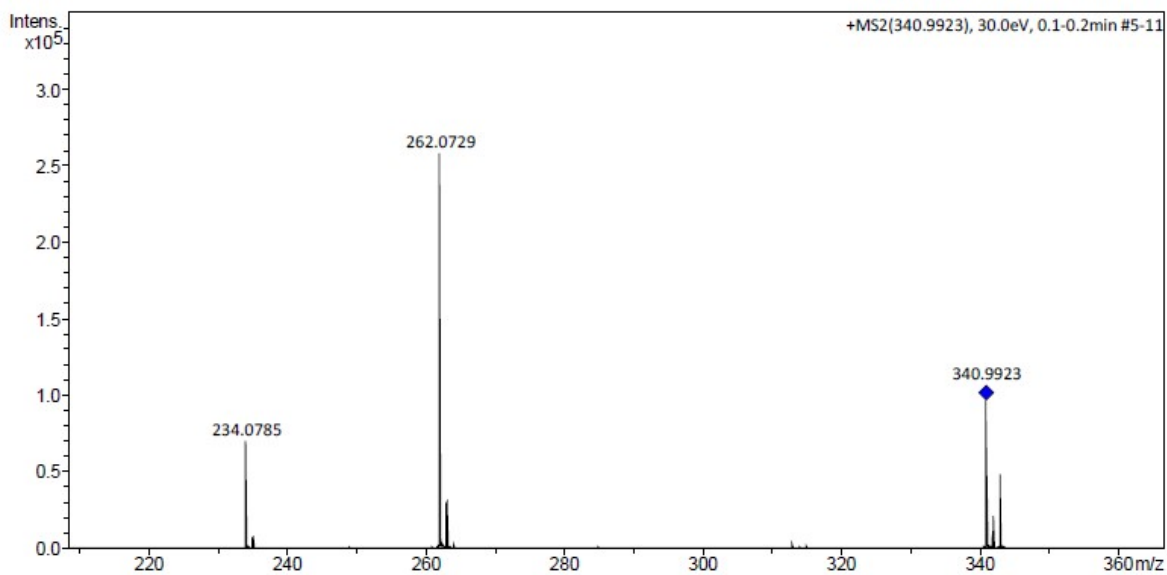

Figure SI-64. ESI-MS chromatogram of 6f.

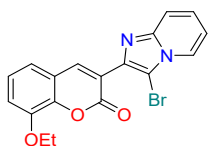

**3-(3-bromoimidazo[1,2-a]pyridin-2-yl)-8-ethoxy-2H-chromen-2-one (6g):** Yield 56%; dark brown powder; m.p. = 158 – 161 °C; RMN <sup>1</sup>H (500 MHz, CDCl<sub>3</sub>, 25 °C, TMS) δ (ppm) = 8.184 – 8.168 (m, 2H, Ar), 7.638 (sd, *J* (H,H) = 9 Hz, 1H, Ar), 7.287 (d, *J* (H,H) = 8.5 Hz, 1H, Ar), 7.201 (t, *J* (H,H) = 7.5 Hz, 1H, Ar), 7.132 (d, *J* (H,H) = 8 Hz, 1H, Ar), 7.094 (d, *J* (H,H) = 8 Hz, 1H, Ar), 6.962 (t, *J* (H,H) = 7 Hz, 1H, Ar), 4.203 (q, *J* (H,H) = 7.5 Hz, 1H, -CH<sub>2</sub>-CH<sub>3</sub>), 1.513 (t, *J* (H,H) = 7.5 Hz, 1H, CH<sub>3</sub>); RMN <sup>13</sup>C (125 MHz, CDCl<sub>3</sub>, 25 °C, TMS) δ (ppm) = 158.620, 146.580, 145.542, 144.212, 143.985, 138.401, 125.674, 124.574, 124.124, 121.668, 119.997, 119.829, 117.889, 115.319, 113.649, 95.590, 65.144, 14.911; FT-IR (KBr) ν<sub>max</sub> = 3040 cm<sup>-1</sup> (C–H Ar), 2922 cm<sup>-1</sup> (C–H Aliphatic), 1722 cm<sup>-1</sup> (C=O lactone), 1632 cm<sup>-1</sup> (C=C Ar); UV–Vis (MeOH) λ<sub>max</sub> = 340.05 nm; HRMS (ESI m/z) Calcd. for C<sub>18</sub>H<sub>14</sub>BrN<sub>2</sub>O<sub>3</sub> [M+H]<sup>+</sup> 385.0182, found 385.0214.

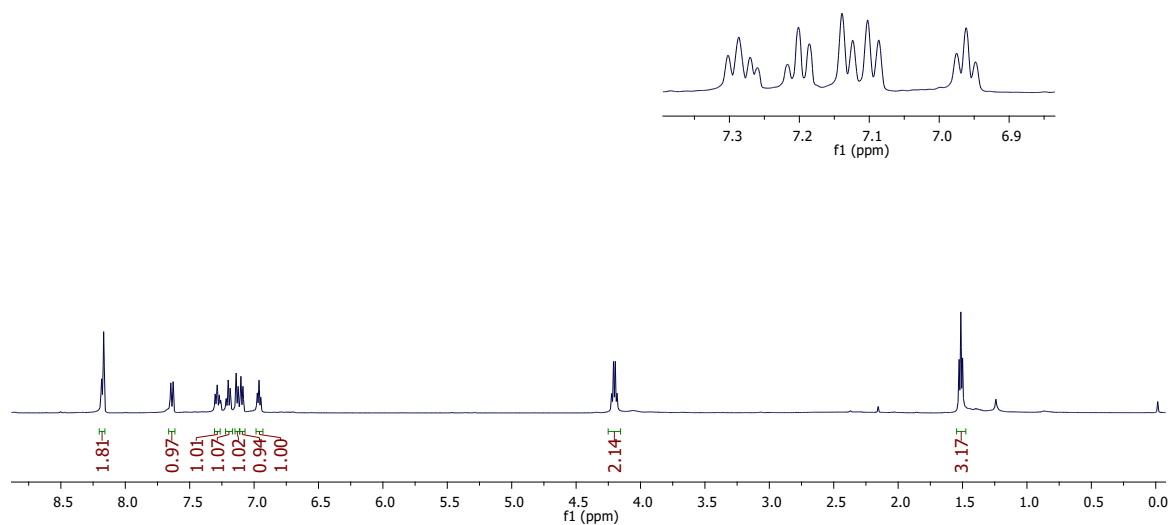

Figure SI-65. <sup>1</sup>H NMR spectra of **6g** on CDCl<sub>3</sub> 500 MHz



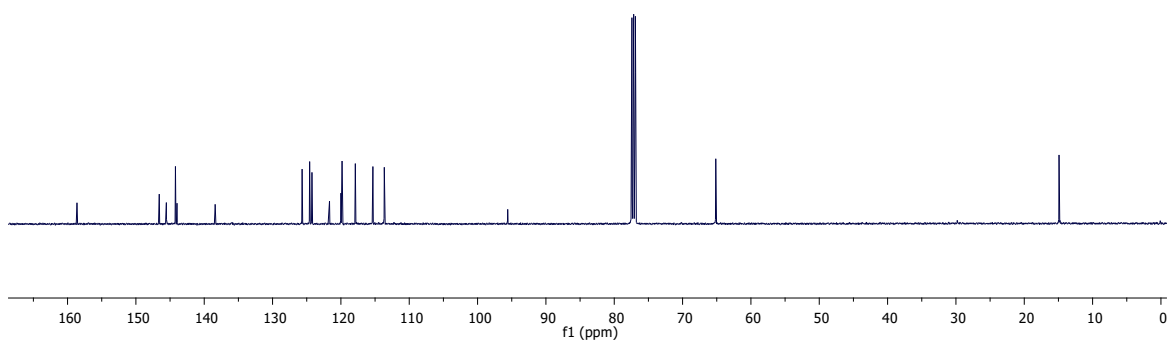

**Figure SI-66.**  $^{13}\text{C}$  NMR spectra of **6g** on  $\text{CDCl}_3$  125 MHz.

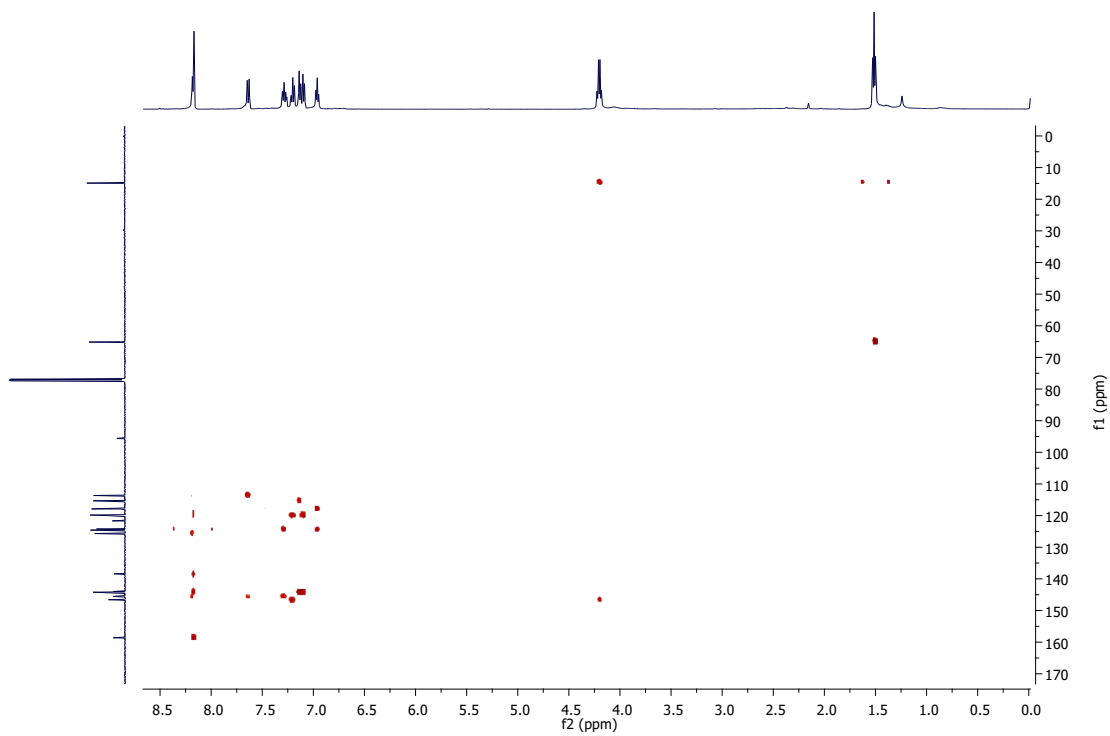

**Figure SI-67.** HMBC NMR spectra of **6g** on  $\text{CDCl}_3$

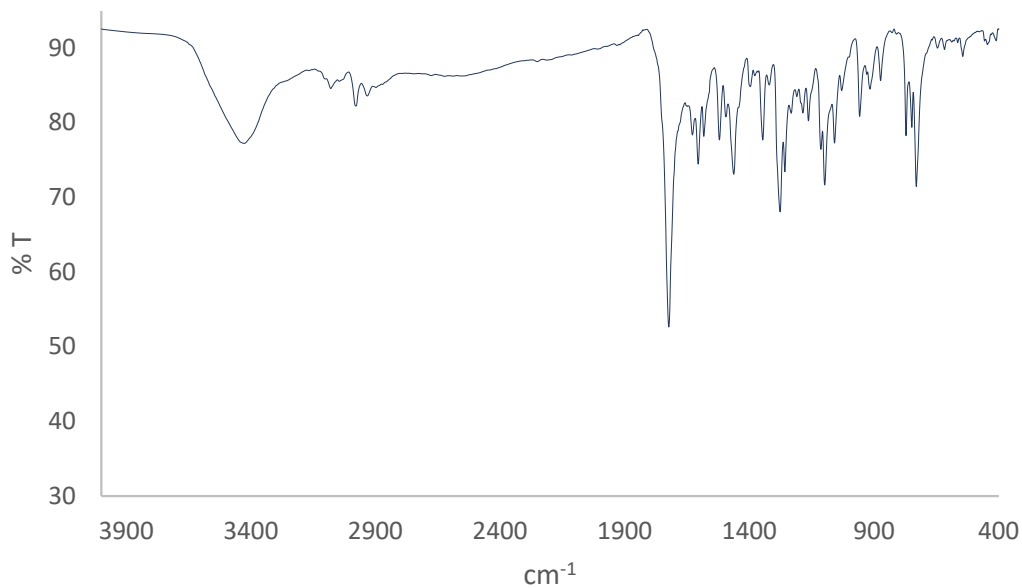

Figure SI-68. IR spectra for **6g** in KBr.

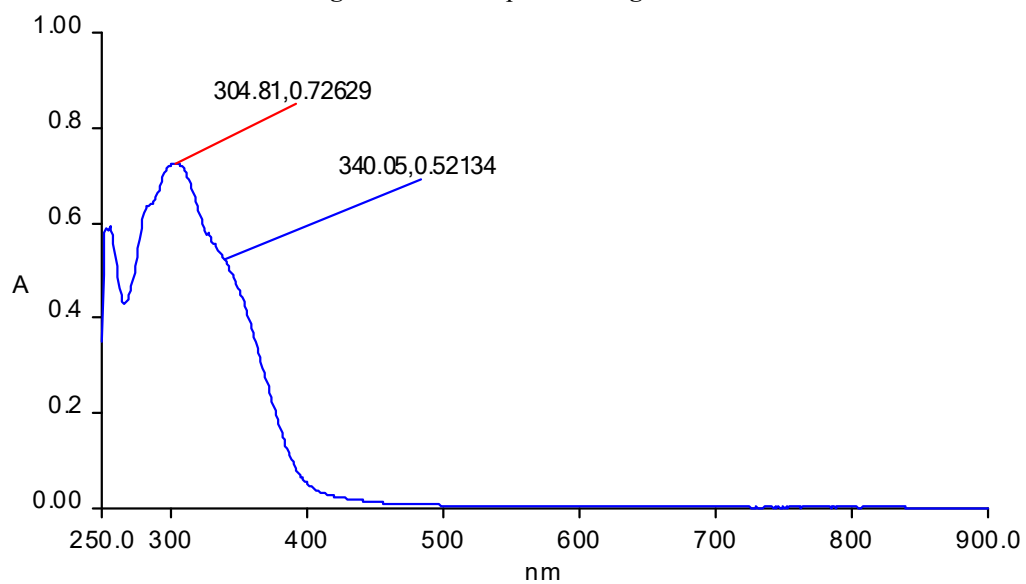

Figure SI-69. UV-Vis spectra of **6g** in MeOH.

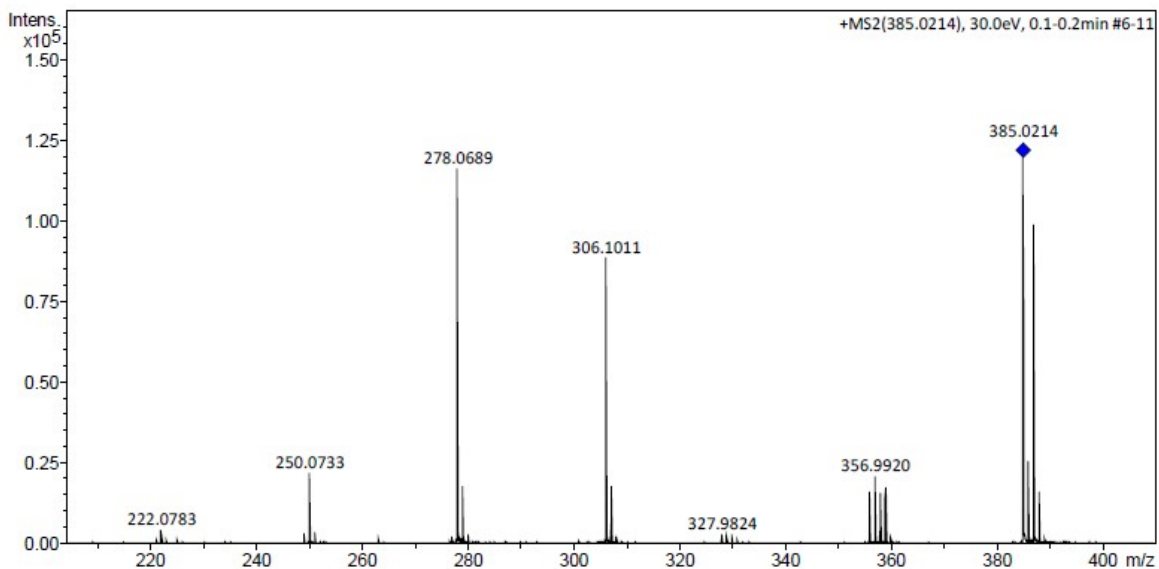

Figure SI-70. ESI chromatogram of **6g**.

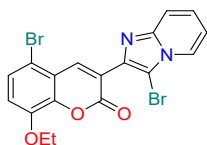

**5-bromo-3-(3-bromoimidazo[1,2-a]pyridin-2-yl)-8-ethoxy-2H-chromen-2-one**

**(6h):** Yield 89%; reddish brown; m.p. = 165 – 167 °C; RMN <sup>1</sup>H (500 MHz, CDCl<sub>3</sub>, 25 °C, TMS) δ (ppm) = 8.480 (s, 1H, -CH<sub>2</sub>-CH<sub>3</sub>), 8.192 (d, *J* (H,H) = 6.5 Hz, 1H, Ar), 7.676 (d, *J* (H,H) = 9 Hz, 1H, Ar), 7.427 (d, *J* (H,H) = 9 Hz, 1H, Ar), 7.308 (t, *J* (H,H) = 7 Hz, 1H, Ar), 6.983 – 6.952 (m, 2H, H-6, Ar), 4.188 (q, *J* (H,H) = 7.5 Hz, 1H, -CH<sub>2</sub>-CH<sub>3</sub>), 1.517 (t, *J* (H,H) = 7.5 Hz, 1H, CH<sub>3</sub>); RMN <sup>13</sup>C (125 MHz, CDCl<sub>3</sub>, 25 °C, TMS) δ (ppm) = 157.960, 146.215, 145.619, 144.729, 143.090, 138.033, 128.023, 125.776, 124.232, 122.606, 119.450, 118.080, 115.698, 113.785, 112.302, 95.780, 65.374, 14.807; FT-IR (KBr)  $\nu_{\text{max}}$  = 29.24 cm<sup>-1</sup> (C–H Aliphatic), 1728 cm<sup>-1</sup> (C=O lactone), 1573 cm<sup>-1</sup> (C=C Ar); UV–Vis (MeOH)  $\lambda_{\text{max}}$  = 316.850 nm; HRMS (ESI m/z) Calcd. for C<sub>18</sub>H<sub>13</sub>Br<sub>2</sub>N<sub>2</sub>O<sub>3</sub> [M+H]<sup>+</sup> 461.9215, found 462.9295.

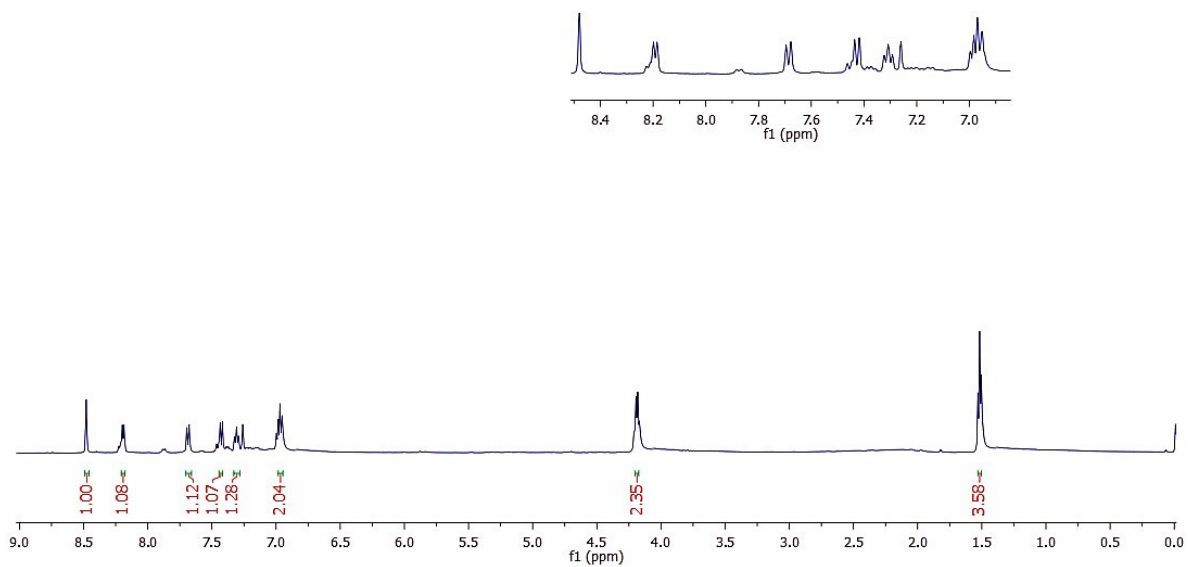

Figure SI-71.  $^1\text{H}$  NMR spectra of **6h** on  $\text{CDCl}_3$  500 MHz

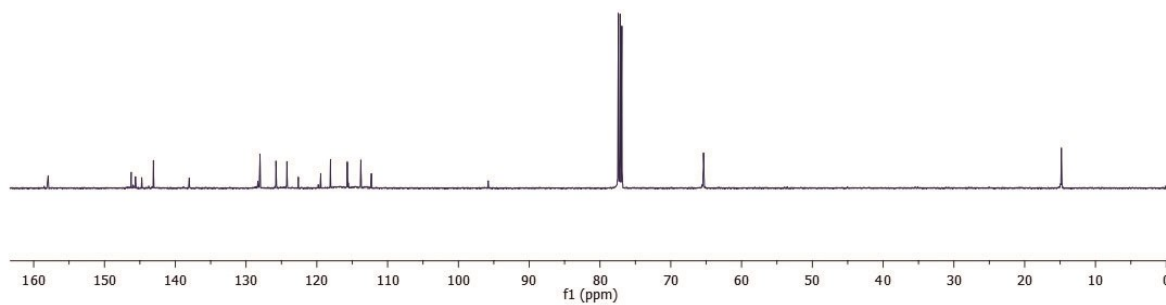

Figure SI-72.  $^{13}\text{C}$  NMR spectra of **6h** on  $\text{CDCl}_3$  125 MHz.

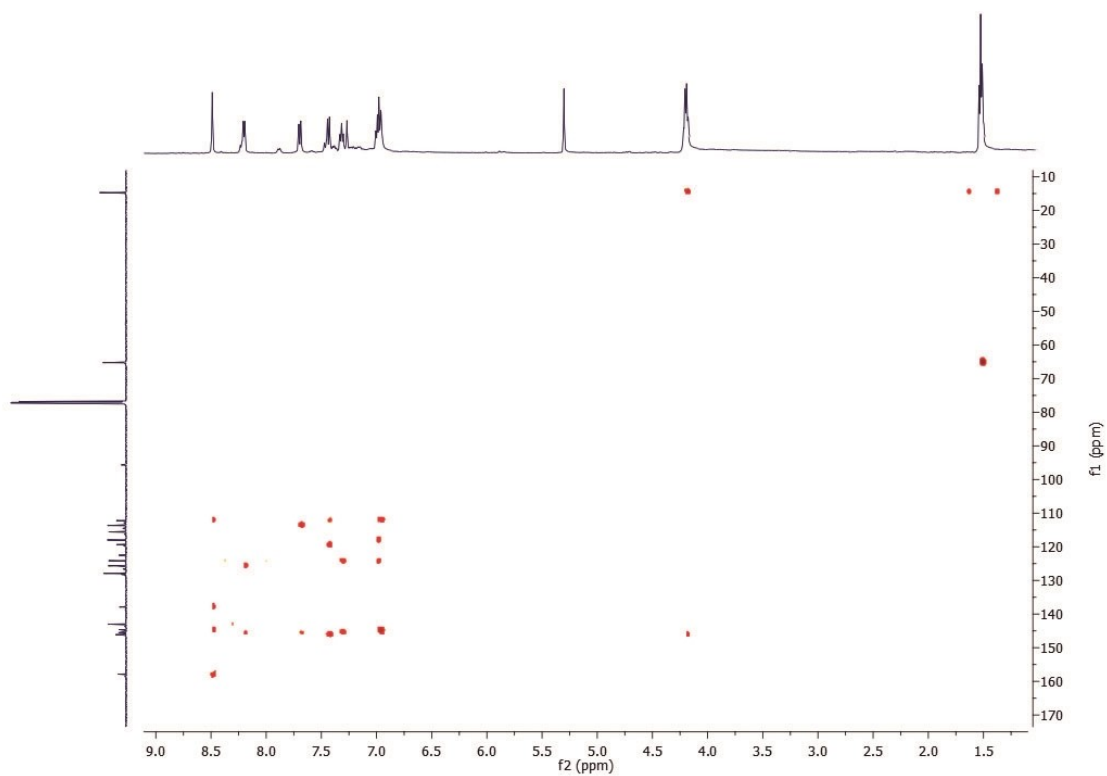

**Figure SI-73.** HMBC NMR spectra of **6h** on  $\text{CDCl}_3$

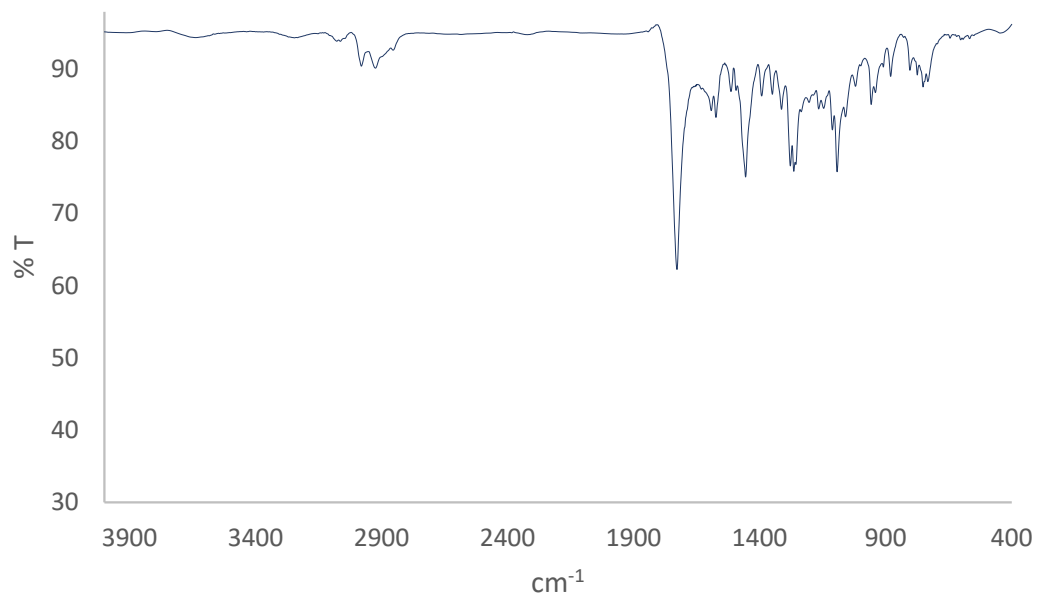

**Figure SI-74.** IR spectra for **6h** in KBr.

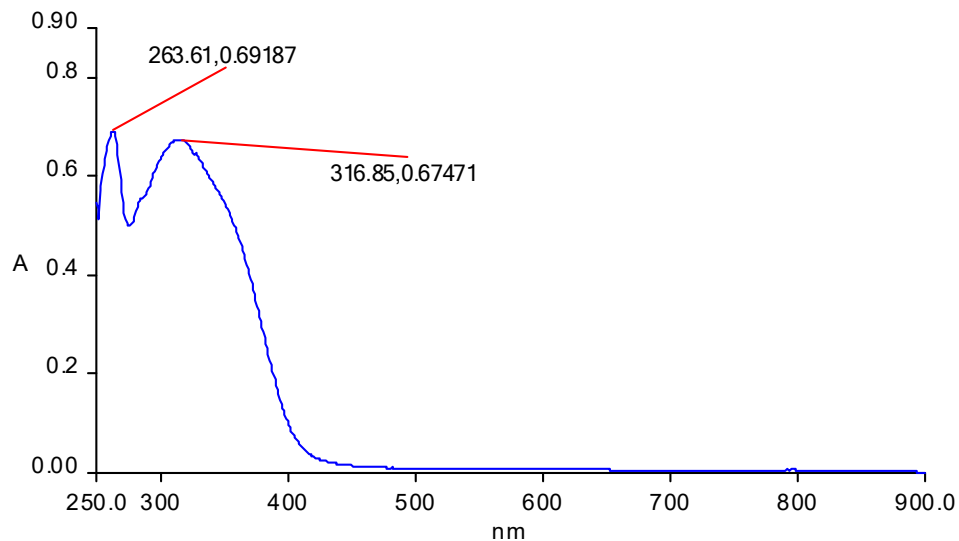

Figure SI-75. UV-Vis spectra of **6h** in MeOH.

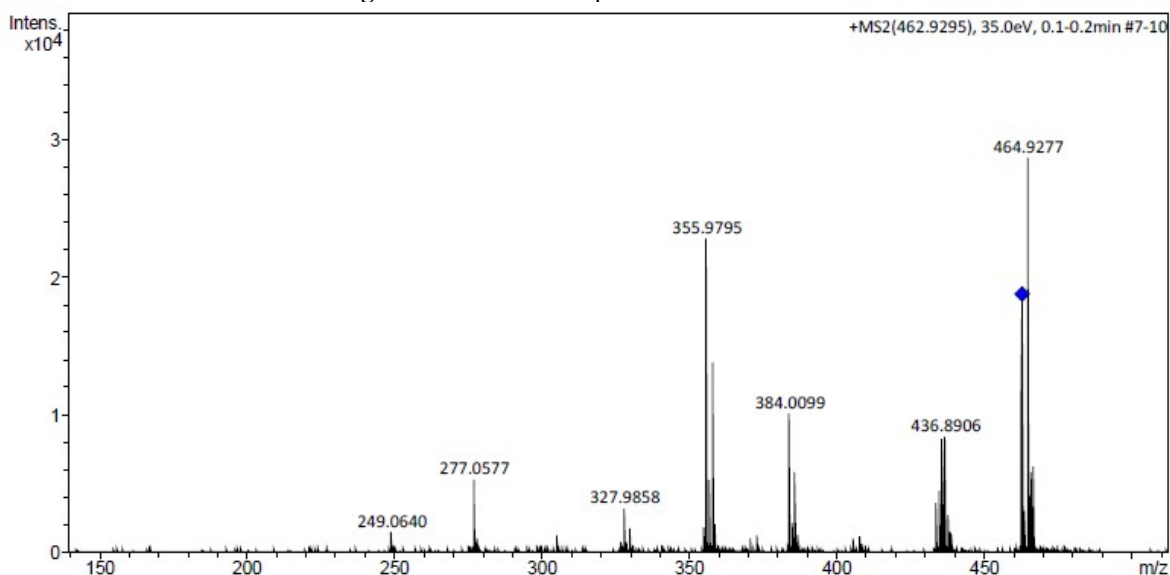

Figure SI-76. ESI-MS chromatogram of **6h**.

## 5. General procedure of coumarin-imidazo[1,2-*a*]pyridine-3-acrylates derivatives **7a-h**

### Method A: Alkenylation by C–H bond activation.

In a 15 mL round bottom flask **4a** (0.5 mmol), catalyst (15% mol), phase transfer agent (TA, 1 mmol), and base (1 mmol) were added according to the reagents shown in Table 1, the flask was sealed and purged with nitrogen, 5 mL of DMF and 2 mmol of methyl acrylate were injected into the flask. The flask was kept at 100 °C and shaken constantly for 7 days. The reaction crude was treated by adding distilled water, which caused the precipitation of the medium, the solid was filtered and redissolved in dichloromethane, the solution was filtered again through a buchner funnel packed with celite, the collected solution was washed with three volumes of NaHCO<sub>3</sub> saturated solution, the organic phase was concentrated and the solid was purified by chromatographic column in Hex/AcOEt 80:20 elution system.

**Table S1.** Condition optimization for C–H bond activation.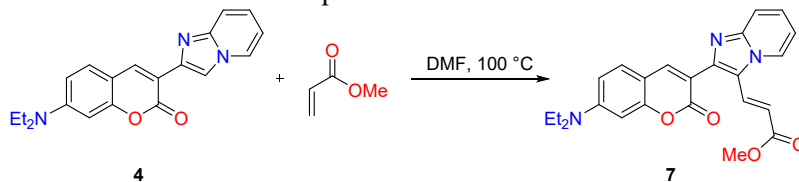

| Entry | Catalyst                                                                 | Base               | TA <sup>a</sup>                                                          | t (days) | (%) R |
|-------|--------------------------------------------------------------------------|--------------------|--------------------------------------------------------------------------|----------|-------|
| 1     | Pd(OAc) <sub>2</sub> (15%)                                               |                    |                                                                          | 2        | 30    |
| 2     | PdCl <sub>2</sub> (15%)                                                  |                    |                                                                          | 7        | 22    |
| 3     | Palladium Dichloro-N,N,N',N'-<br>(Tetramethylethylenediamine) (II) (15%) | NaHCO <sub>3</sub> | Hexadecyltrimethylammonium Bromide (C <sub>19</sub> H <sub>42</sub> BrN) | 7        | 18    |
| 4     |                                                                          | CaCO <sub>3</sub>  |                                                                          | 7        | 18    |
| 5     |                                                                          | <i>t</i> -BuOK     |                                                                          | 7        | 15    |
| 6     | Pd(OAc) <sub>2</sub> (15%)                                               | NaHCO <sub>3</sub> | Tetrabutylammonium acetate                                               | 7        | ----- |
| 7     |                                                                          |                    | -----                                                                    | 7        | ----- |

<sup>a</sup>TA : Transfer agent**Method B: Method B: Heck reaction**

In a 15 mL round bottom flask, **6a-j** (0.5 mmol), catalyst (15% mol), BINAP (30% mol), base (1 mmol) and AgOAc (1 mmol) were added. Table 2 shows the reagents used. The flask was sealed and purged with nitrogen, then solvent (5 mL) and methyl acrylate (2 mmol) were injected, the flask was kept at 100 °C and stirred (2-7 days). The reaction was treated by adding distilled water which caused the precipitation of the medium, the solid was filtered and redissolved in dichloromethane, the collected solution was washed with three volumes of NaHCO<sub>3</sub> saturated solution, the organic phase was concentrated and purified by chromatographic column in Hex/AcOEt 80:20 elution system.

**Table S2.** Condition optimization for Heck reaction.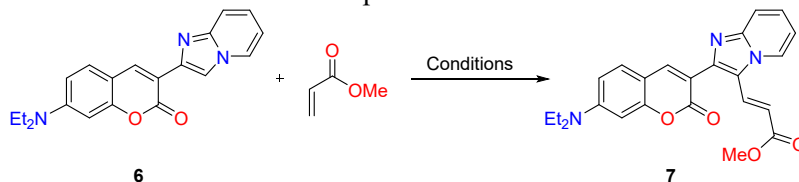

| Entry | Catalyst                                                                 | Solvent | Base               | Aditive              | T (°C) | %R | t (days) |
|-------|--------------------------------------------------------------------------|---------|--------------------|----------------------|--------|----|----------|
| 1     |                                                                          | DMF     |                    | ----                 |        | 70 | 2        |
| 2     | Pd(OAc) <sub>2</sub> (15%)                                               |         |                    |                      | 100    | 78 | 2        |
| 3     |                                                                          | Dioxane |                    |                      |        | 85 | 2        |
| 4     |                                                                          | THF     |                    |                      |        | 66 | 7        |
| 5     | PdCl <sub>2</sub> (15%)                                                  |         | NaHCO <sub>3</sub> | Ag(OAc) <sub>2</sub> |        | 80 | 7        |
| 6     | Palladium Dichloro-N,N,N',N'-<br>(Tetramethylethylenediamine) (II) (15%) | Dioxane |                    |                      | 100    | 66 | 7        |
| 7     | Pd(OAc) <sub>2</sub> (15%)                                               |         | CaCO <sub>3</sub>  |                      |        | 85 | 2        |
| 8     | Pd(OAc) <sub>2</sub> (15%)                                               |         | <i>t</i> -BuOK     |                      |        | 67 | 2        |
| 9     | Pd(OAc) <sub>2</sub> (15%)                                               |         | CaCO <sub>3</sub>  |                      |        | 87 | 2        |

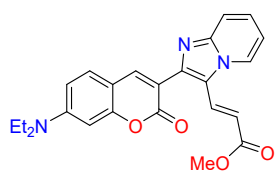

**Methyl (E)-3-(2-(7-(diethylamino)-2-oxo-2H-chromen-3-yl)imidazo[1,2-a]pyridin-3-yl)acrylate (7a):** Yield 87%; yellow powder; m.p. = 219 – 223 °C; RMN <sup>1</sup>H (500 MHz, CDCl<sub>3</sub>, 25 °C, TMS) δ (ppm) = 8.391 (d, *J* (H,H) = 6.5 Hz, 1H, Ar), 8.013 – 7.999 (m, 2H, Ar), 7.659 (d, *J* (H,H) = 9 Hz, 1H, Ar), 7.329 – 7.311 (m, 2H, Ar), 6.965 (d, *J* (H,H) = 7 Hz, 1H, Ar), 6.587 (d, *J* (H,H) = 9 Hz, 1H, Ar), 6.525 (s, 1H, Ar), 7.206 (d, *J* (H,H) = 16 Hz, 1H,  $-\underline{\text{CH}}=\text{C}-$ ), 3.758 (s, 1H,  $\underline{\text{CH}}_3$ ), 3.417 (q, *J* (H,H) = 7.5 Hz, 4H,  $-\underline{\text{CH}}_2-\text{CH}_3$ ), 1.210 (t, *J* (H,H) = 7.5 Hz, 6H,  $\underline{\text{CH}}_3$ ); RMN <sup>13</sup>C (125 MHz, CDCl<sub>3</sub>, TMS) δ (ppm): CDCl<sub>3</sub>, 25 °C, TMS) δ (ppm) = 167.734, 160.559, 157.095, 151.356, 147.035, 145.191, 145.160, 130.231, 129.705, 126.609, 125.141, 118.770, 118.095, 114.177, 114.067, 113.992, 109.283, 108.727, 97.157, 51.772, 44.985, 12.532; FT-IR (KBr)  $\nu_{\text{max}}$  = 3020 cm<sup>-1</sup> (C–H Ar), 2969 cm<sup>-1</sup> (C–H Aliphatic), 1714 cm<sup>-1</sup> (C=O lactone), 1619 cm<sup>-1</sup> ( $-\text{O}-\underline{\text{C}}=\text{O}$ ), 1595 cm<sup>-1</sup> (C=C Ar); UV–Vis (MeOH)  $\lambda_{\text{max}}$  = 415.15 nm; HRMS (ESI *m/z*) Calcd. for C<sub>24</sub>H<sub>24</sub>N<sub>3</sub>O<sub>4</sub> [M+H]<sup>+</sup> 418.1761, found 418.1770.

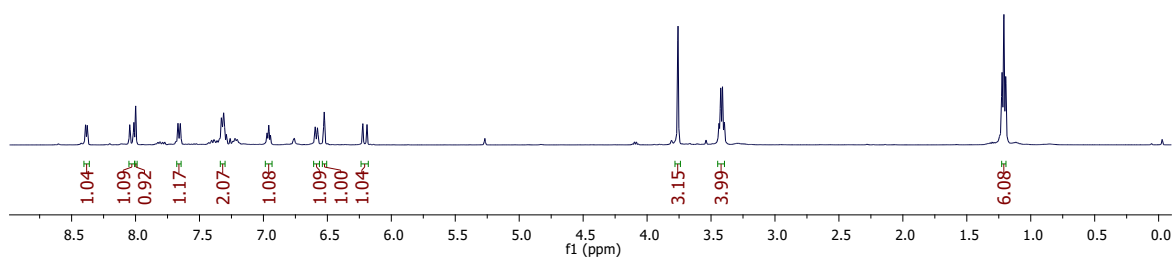

Figure SI-77. <sup>1</sup>H NMR spectra of **7a** on CDCl<sub>3</sub> 500 MHz



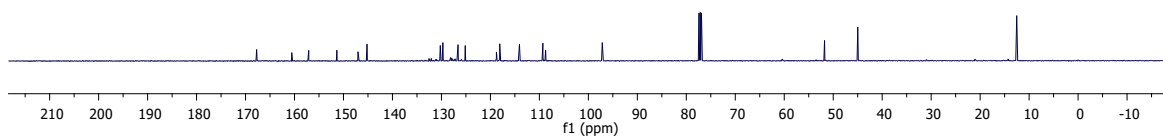

**Figure SI-78.**  $^{13}\text{C}$  NMR spectra of **7a** on  $\text{CDCl}_3$  125 MHz.

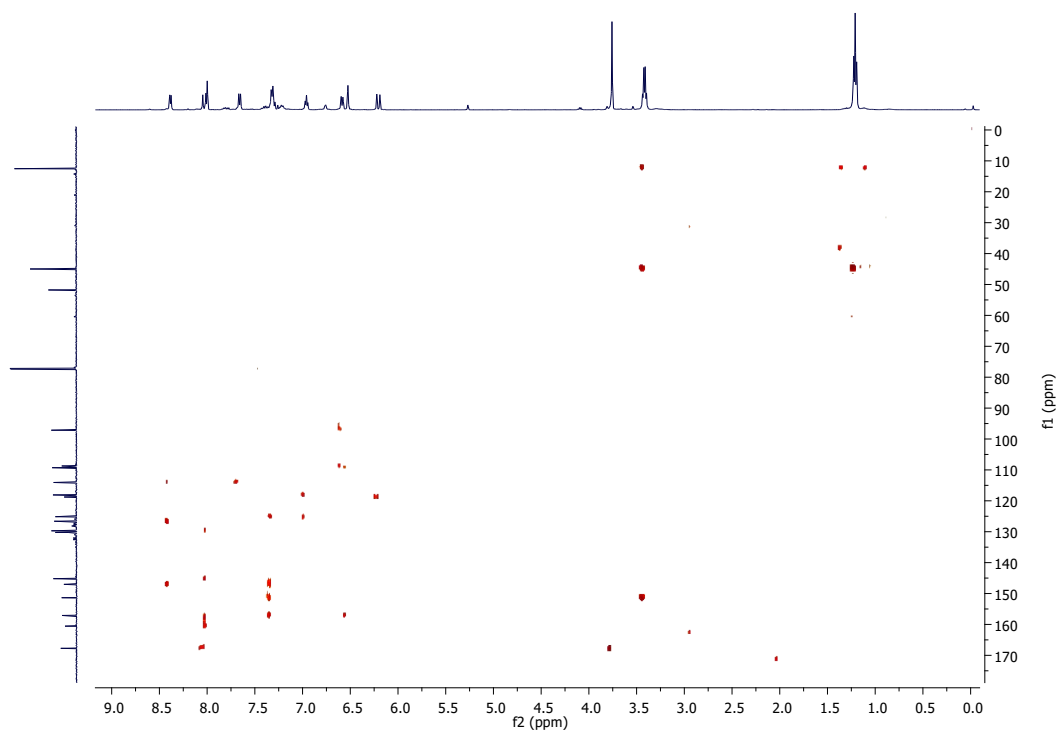

**Figure SI-79.** HMBC NMR spectra of **7a** on  $\text{CDCl}_3$

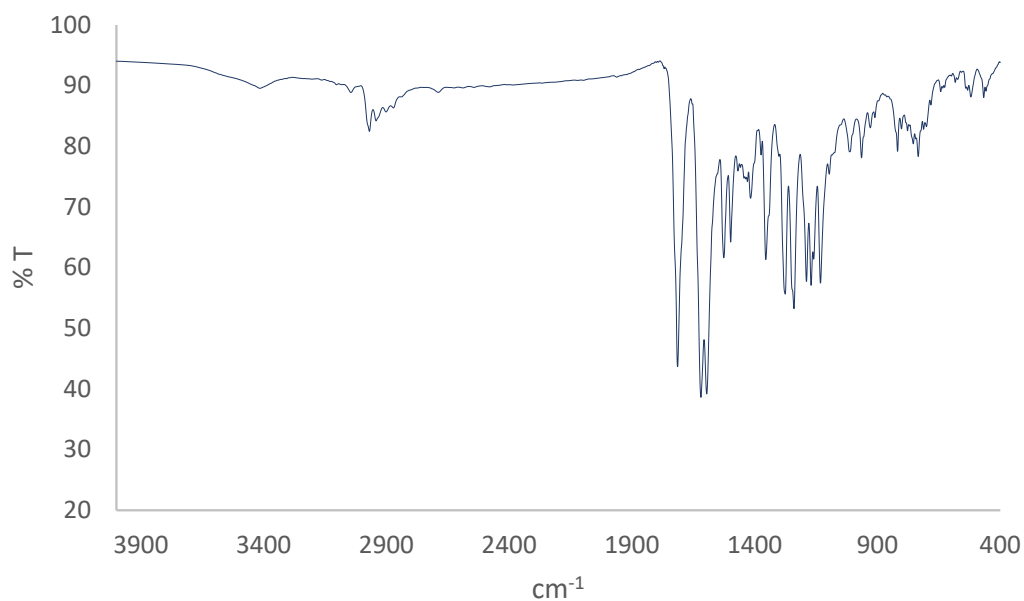

**Figure SI-80.** IR spectra for **7a** in KBr.

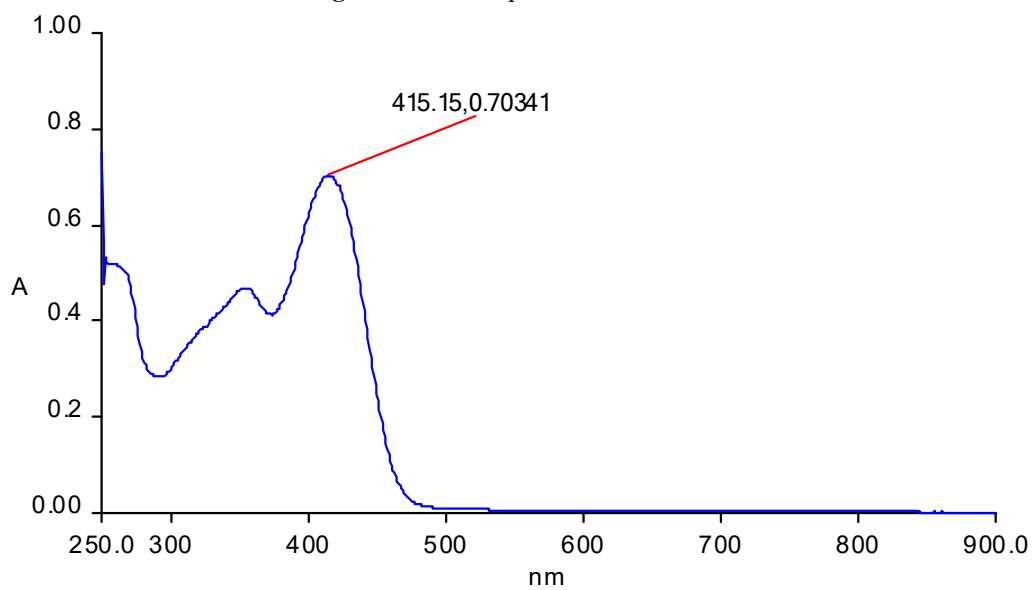

**Figure SI-81.** UV-Vis spectra of **7a** in MeOH.

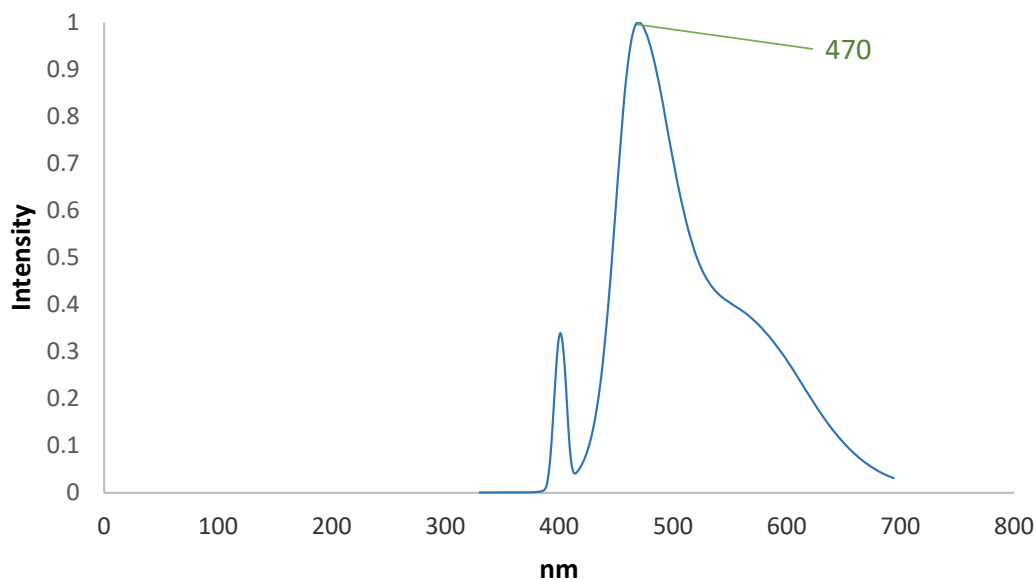

Figure SI-82. Emission spectra of **7a** in MeOH.

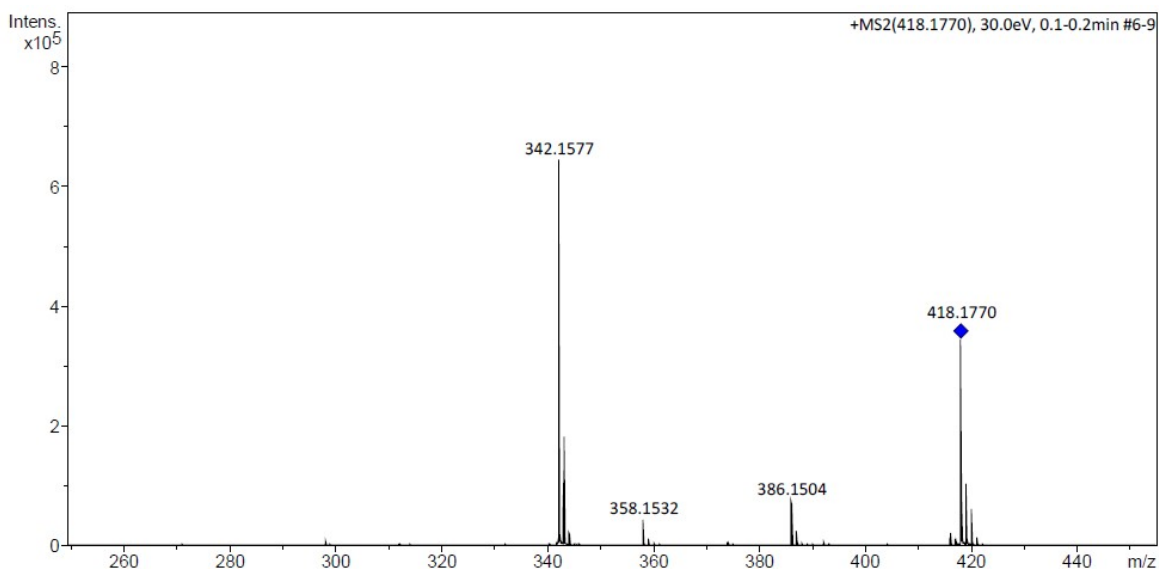

Figure SI-83. ESI-MS chromatogram of **7a**.

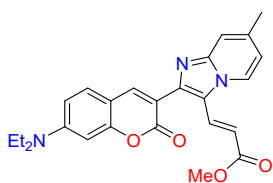

**Methyl (E)-3-(2-(7-(diethylamino)-2-oxo-2H-chromen-3-yl)-7-methylimidazo[1,2-a]pyridin-3-yl)acrylate (**7b**):** Yield 85%; yellow powder; m.p. = 188 – 190 °C; RMN <sup>1</sup>H (500 MHz, CDCl<sub>3</sub>, 25 °C, TMS) δ (ppm) = 8.276 (d, *J* (H,H) = 7 Hz, 1H, Ar), 8.026 – 7.991 (m, 1H, Ar), 7.420 (s, 1H, Ar), 7.323 (d, *J* (H,H) = 8 Hz, 1H, Ar), 8.000 (d, *J* (H,H) = 6.5 Hz, 1H, Ar), 6.600 (d, *J* (H,H) = 9 Hz, 1H, Ar), 6.532 (s, 1H, Ar), 6.159 (d, *J* (H,H) = 16 Hz, 1H, –CH=C–), 3.761 (s, 3H, CH<sub>3</sub>), 3.426 (q, *J* (H,H) = 7 Hz, 4H, –CH<sub>2</sub>–CH<sub>3</sub>), 2.431 (s, 3H, CH<sub>3</sub>), 1.220 (t, *J* (H,H) = 7.5 Hz, 6H, H-7b’); RMN <sup>13</sup>C (125 MHz, CDCl<sub>3</sub>, 25 °C, TMS) δ (ppm) = 167.900, 160.632, 157.099, 151.338, 147.631, 145.387, 145.111, 138.060, 130.413, 129.705,

124.513, 118.396, 116.651, 116.575, 114.370, 113.056 , 109.274, 108.7996, 97.207, 51.854, 45.119, 21.562, 12.670; FT-IR (KBr)  $\nu_{\max}$  = 2925  $\text{cm}^{-1}$  (C-H Aliphatic), 1708  $\text{cm}^{-1}$  (C=O lactone), 1619  $\text{cm}^{-1}$  (-O-C=O), 1608  $\text{cm}^{-1}$  (C=C Ar); UV-Vis (MeOH)  $\lambda_{\max}$  = 415.81 nm; HRMS (ESI m/z) Calcd. for  $\text{C}_{25}\text{H}_{26}\text{N}_3\text{O}_4$   $[\text{M}+\text{H}]^+$  432.1918, found 432.1919.

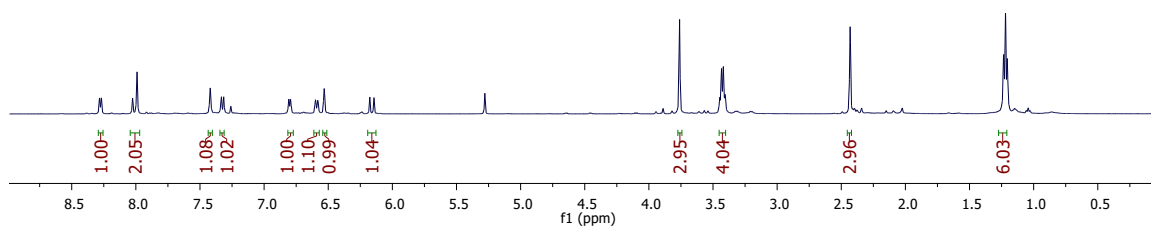

**Figure SI-84.**  $^1\text{H}$  NMR spectra of **7b** on  $\text{CDCl}_3$  500 MHz

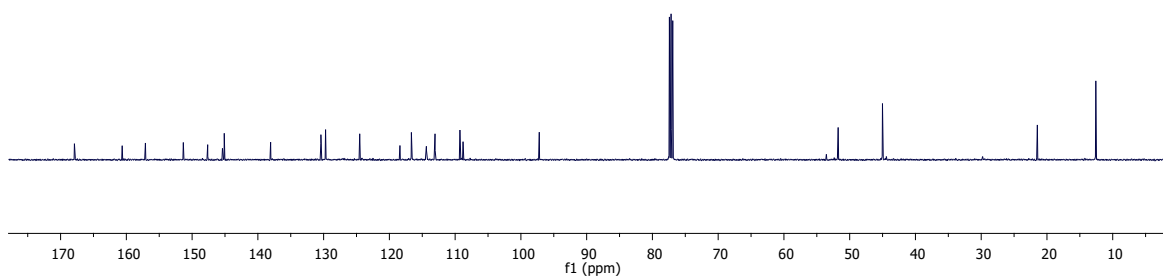

Figure SI-85.  $^{13}\text{C}$  NMR spectra of **7b** on  $\text{CDCl}_3$  125 MHz.

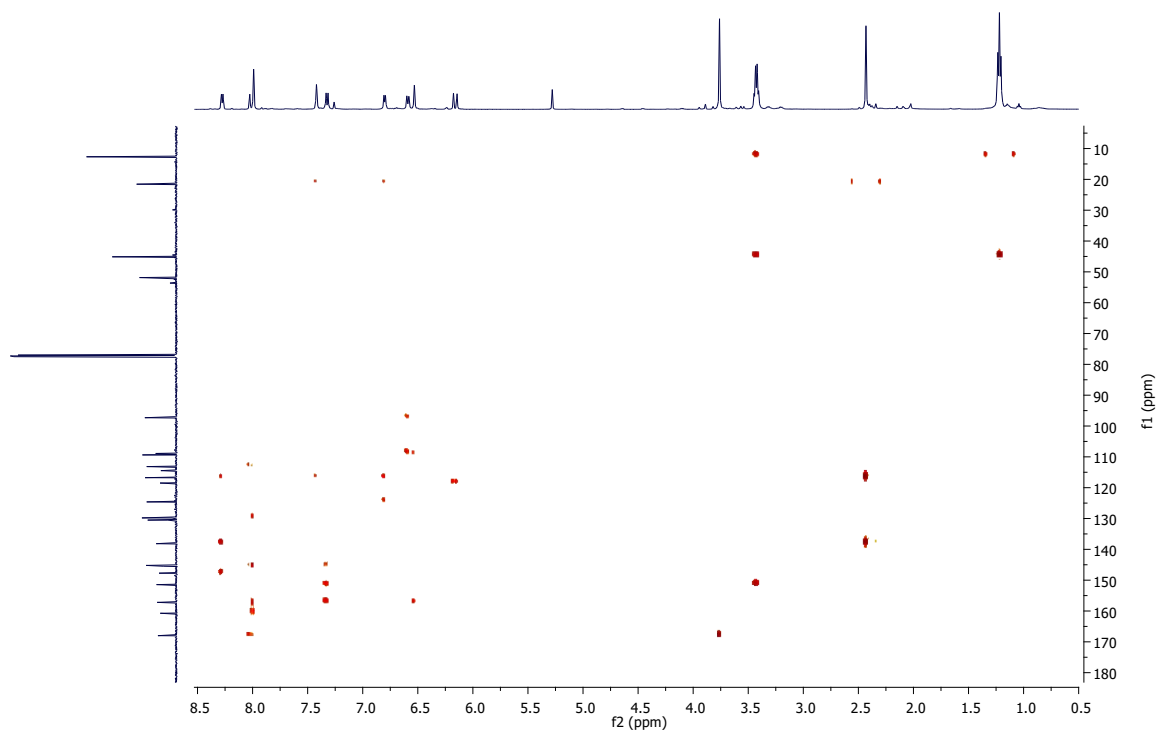

Figure SI-86. HMBC NMR spectra of **7b** on  $\text{CDCl}_3$

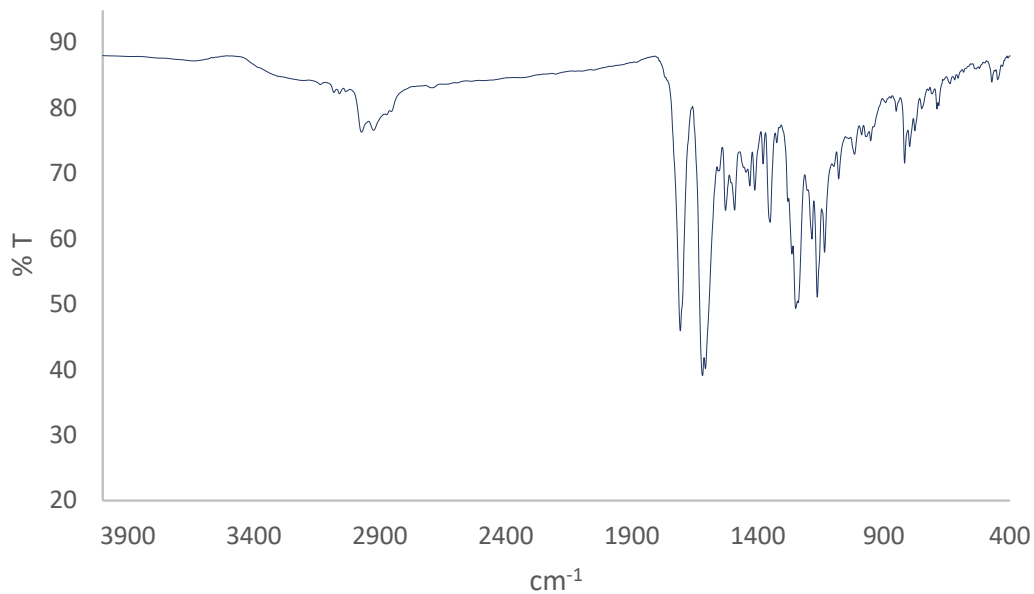

**Figure SI-87.** IR spectra for **7b** in KBr.

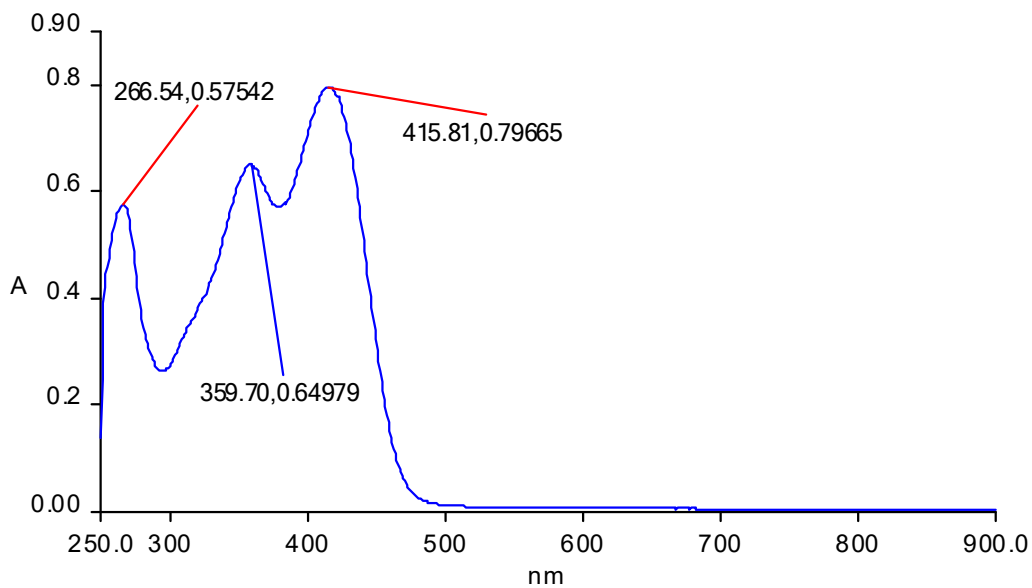

**Figure SI-88.** UV-Vis spectra of **7a** in MeOH.

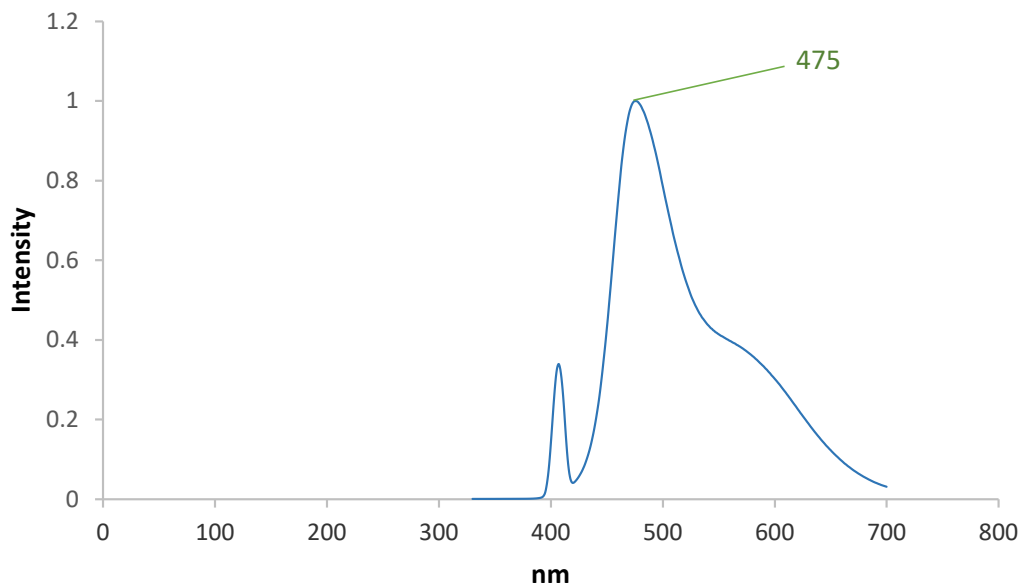

Figure SI-89. Emission spectra of **7b** in MeOH.

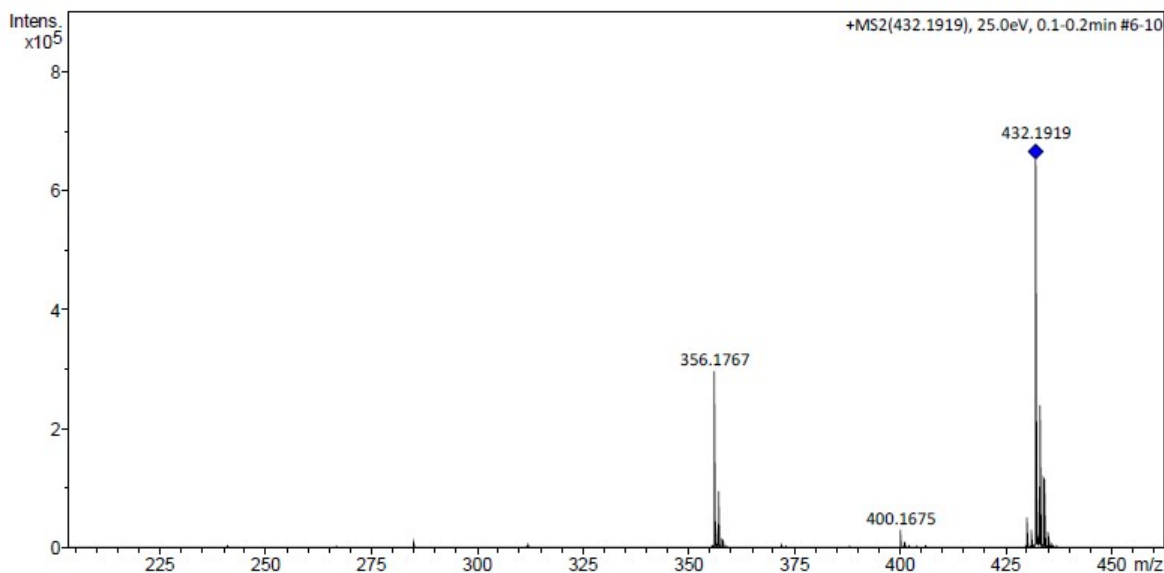

Figure SI-90. ESI-MS chromatogram of **7a**.

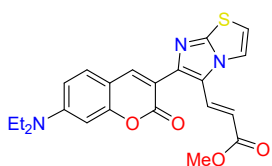

**Methyl (E)-3-(6-(7-(diethylamino)-2-oxo-2H-chromen-3-yl)imidazo[2,1-b]thiazol-5-yl)acrylate (7c):** Yield 46%; yellow powder; m.p. = 185 – 188 °C; RMN <sup>1</sup>H (500 MHz, CDCl<sub>3</sub>, 25 °C, TMS) δ (ppm) = 7.962 – 7.929 (m, 2H, H-3a, Ar), 7.739 (d, *J* (H,H) = 4.5 Hz, 1H,  $-\underline{\text{CH}}=\text{C}-$ ), 7.327 (d, *J* (H,H) = 9 Hz, 1H, Ar), 7.009 (6, *J* (H,H) = 4.5 Hz, 1H,  $-\underline{\text{CH}}=\text{C}-$ ), 6.598 (d, *J* (H,H) = 9 Hz, 1H, Ar), 6.521 (s, 1H, Ar), 6.068 (d, *J* (H,H) = 16 Hz, 1H,  $-\underline{\text{CH}}=\text{C}-$ ), 3.762 (s, 1H,  $\underline{\text{CH}}_3$ ), 3.432 (q, *J* (H,H) = 7.5 Hz, 1H,  $-\underline{\text{CH}}_2-\text{CH}_3$ ), 1.216 (t, *J* (H,H) = 7.5 Hz, 1H,  $\underline{\text{CH}}_3$ ); RMN <sup>13</sup>C (125 MHz, CDCl<sub>3</sub>, 25 °C, TMS) δ (ppm) = 167.537, 160.860, 156.948, 153.227, 151.315, 146.719, 144.502, 131.192, 129.682, 121.207, 119.429, 114.080, 113.924, 112.264, 109.320, 108.320, 97.174, 51.809, 45.023, 12.565; FT-IR (KBr)  $\nu_{\text{max}}$  = 3115 cm<sup>-1</sup> (C–H Ar), 2972 cm<sup>-1</sup> (C–H

Aliphatic), 1709  $\text{cm}^{-1}$  (C=O lactone), 1617  $\text{cm}^{-1}$  ( $-\text{O}-\text{C}=\text{O}$ ), 1595  $\text{cm}^{-1}$  (C=C Ar); UV-Vis (MeOH)  $\lambda_{\text{max}} = 416.21 \text{ nm}$ ; HRMS (ESI  $m/z$ ) Calcd. for  $\text{C}_{22}\text{H}_{22}\text{N}_3\text{O}_4\text{S}$   $[\text{M}+\text{H}]^+$  424.1326, found 424.1332.

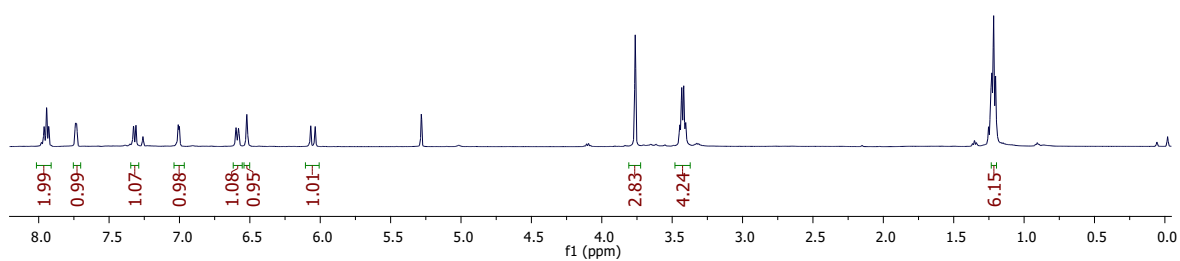

Figure SI-91.  $^1\text{H}$  NMR spectra of 7c on  $\text{CDCl}_3$  500 MHz



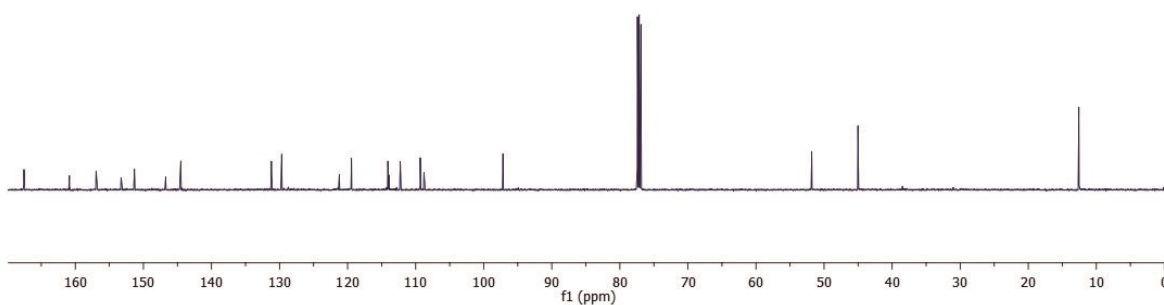

**Figure SI-92.**  $^{13}\text{C}$  NMR spectra of **7c** on  $\text{CDCl}_3$  125 MHz.

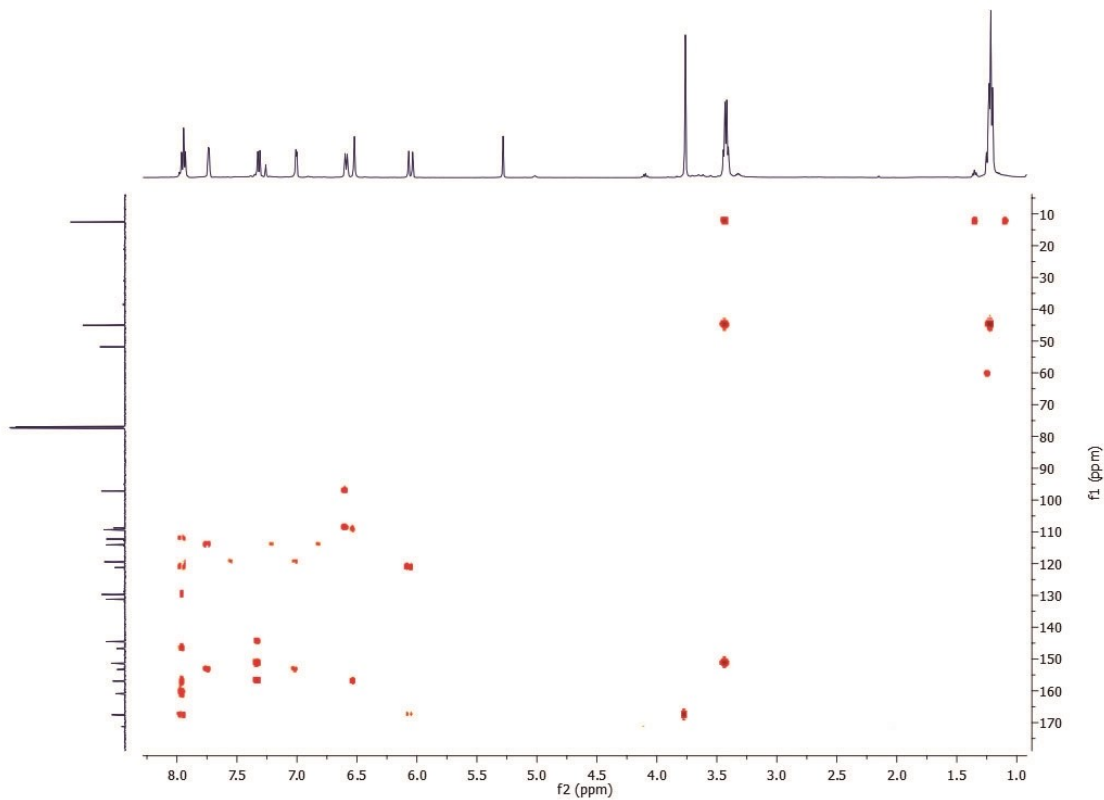

**Figure SI-93.** HMBC NMR spectra of **7c** on  $\text{CDCl}_3$

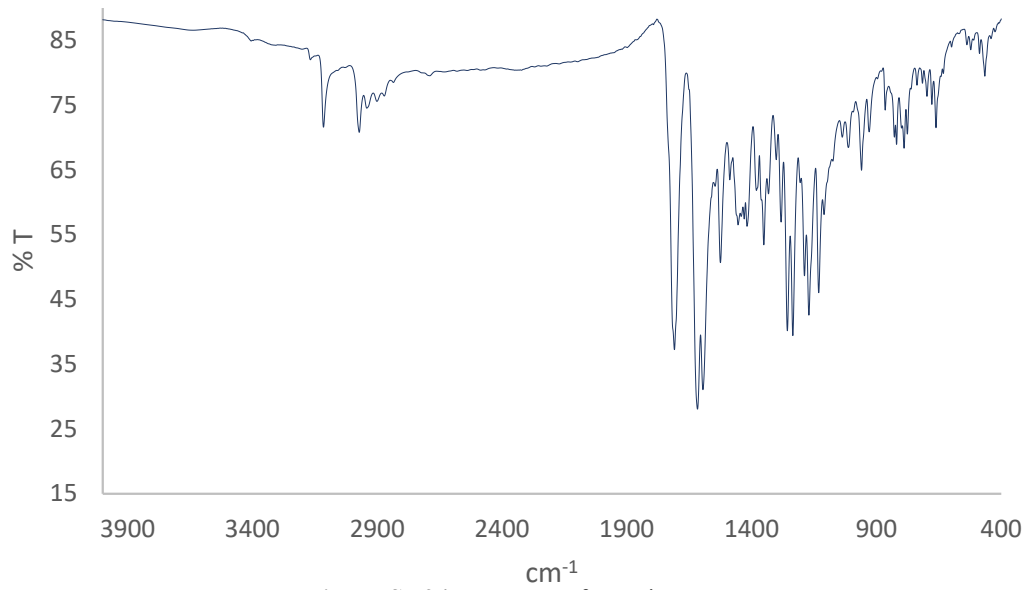

**Figure SI-94.** IR spectra for **7c** in KBr.

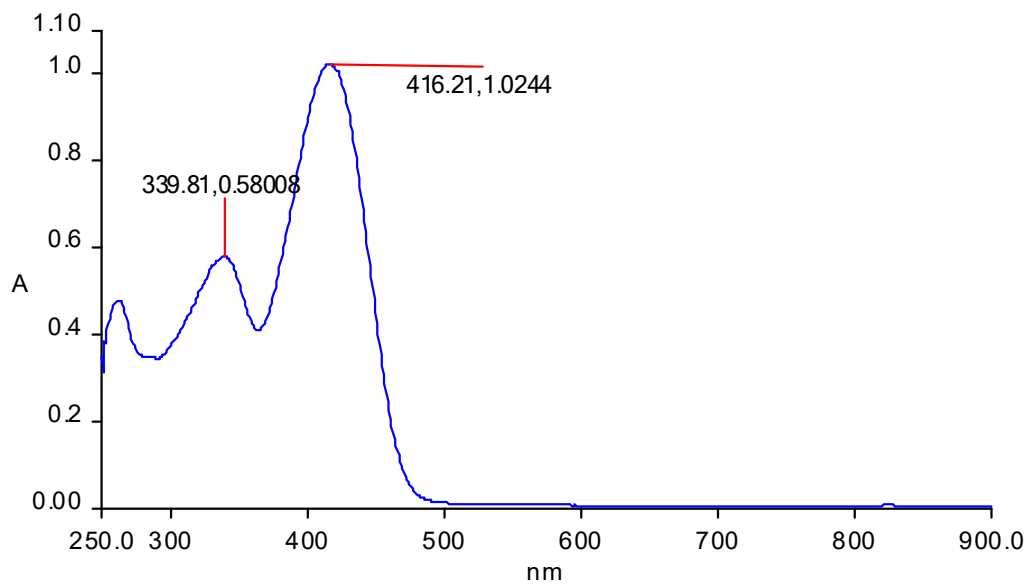

**Figure SI-95.** UV-Vis spectra of **7c** in MeOH.

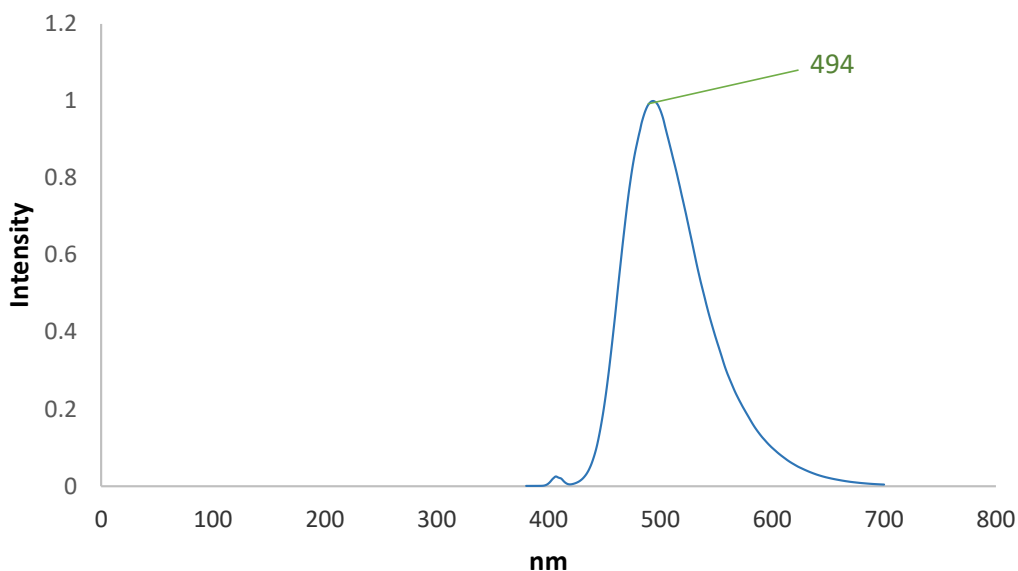

Figure SI-96. Emission spectra of 7c in MeOH.

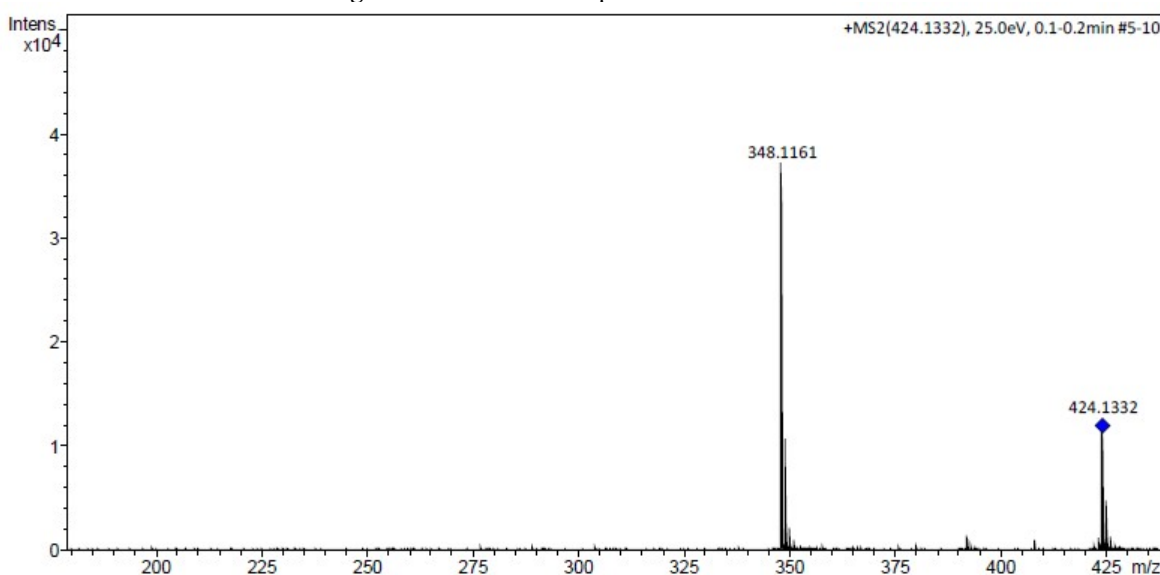

Figure SI-97. ESI-MS chromatogram of 7c.

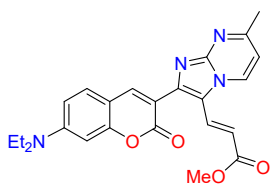

**Methyl (E)-3-(2-(7-(diethylamino)-2-oxo-2H-chromen-3-yl)-7-methylimidazo[1,2-a]pyrimidin-3-yl)acrylate (7d):** Yield 65%; yellow powder; m.p. = 229 – 231 °C; RMN <sup>1</sup>H (500 MHz, CDCl<sub>3</sub>, 25 °C, TMS) δ (ppm) = 8.567 (d, *J* (H,H) = 6 Hz, 1H, Ar), 8.249 (s, 1H, -CH=C-), 8.113 (d, *J* (H,H) = 16.5 Hz, 1H, -CH=C-), 7.357 (d, *J* (H,H) = 8.5 Hz, 1H, Ar), 6.892 (t, *J* (H,H) = 7 Hz, 1H, Ar), 6.620 (d, *J* (H,H) = 9 Hz, 1H, Ar), 6.531 (s, 1H, Ar), 6.129 (d, *J* (H,H) = 16.5 Hz, 1H, -CH=C-), 3.779 (s, 3H, CH<sub>3</sub>), 3.442 (q, *J* (H,H) = 7 Hz, 4H, -CH<sub>2</sub>-CH<sub>3</sub>), 2.663 (s, 3H, CH<sub>3</sub>), 1.231 (t, *J* (H,H) = 7 Hz, 6H, CH<sub>3</sub>); RMN <sup>13</sup>C (125 MHz, CDCl<sub>3</sub>, 25 °C, TMS) δ (ppm) = 167.511, 161.84, 160.494, 157.221, 151.546, 149.904, 146.012, 145.938, 132.288, 130.688, 130.044, 116.767, 114.395, 113.772, 110.816, 109.434, 108.975, 97.105, 51.922, 45.082,

25.145, 12.593; FT-IR (KBr)  $\nu_{\max}$  = 3046  $\text{cm}^{-1}$  (C-H Ar), 2963  $\text{cm}^{-1}$  (C-H Aliphatic), 1719  $\text{cm}^{-1}$  (C=O lactone), 1621  $\text{cm}^{-1}$  (-O-C=O), 1593  $\text{cm}^{-1}$  (C=C Ar); UV-Vis (MeOH)  $\lambda_{\max}$  = 423.07 nm; HRMS (ESI m/z) Calcd. for  $\text{C}_{24}\text{H}_{25}\text{N}_4\text{O}_4$   $[\text{M}+\text{H}]^+$  433.1870, found 433.1872.

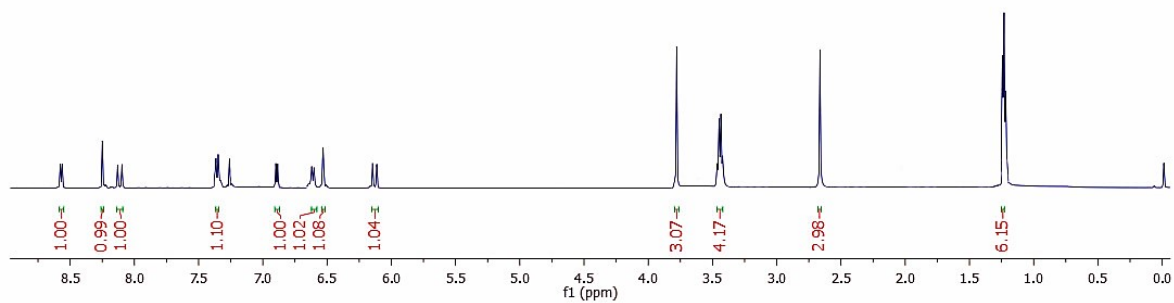

**Figure SI-98.**  $^1\text{H}$  NMR spectra of **7d** on  $\text{CDCl}_3$  500 MHz

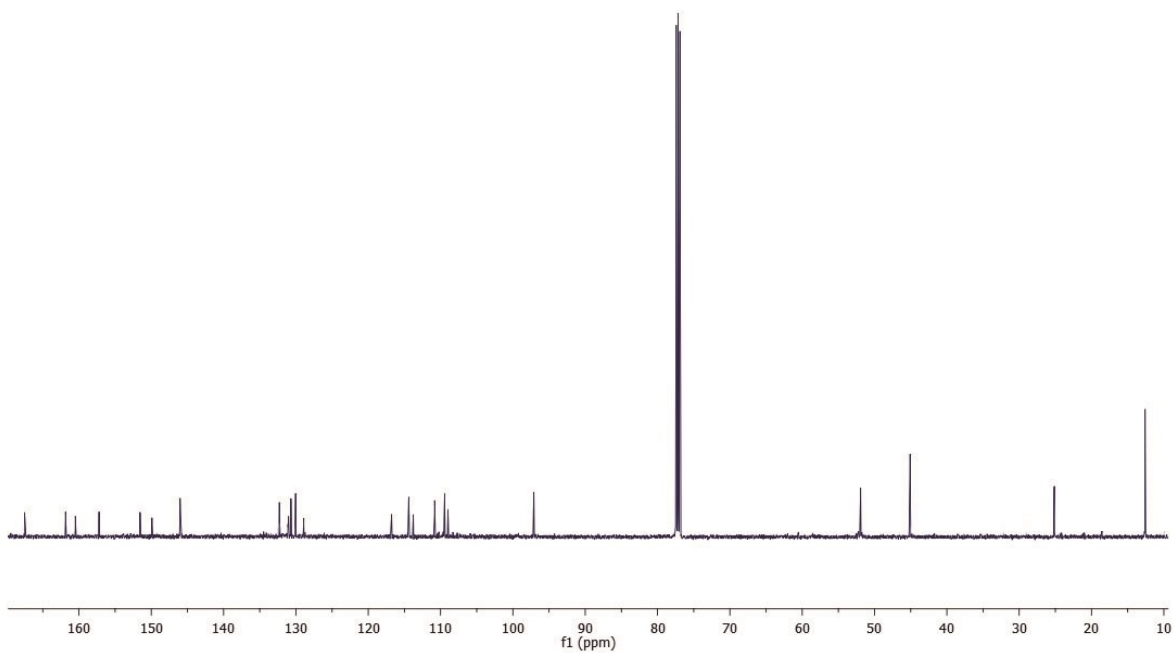

**Figure SI-99.**  $^{13}\text{C}$  NMR spectra of **7d** on  $\text{CDCl}_3$  125 MHz.

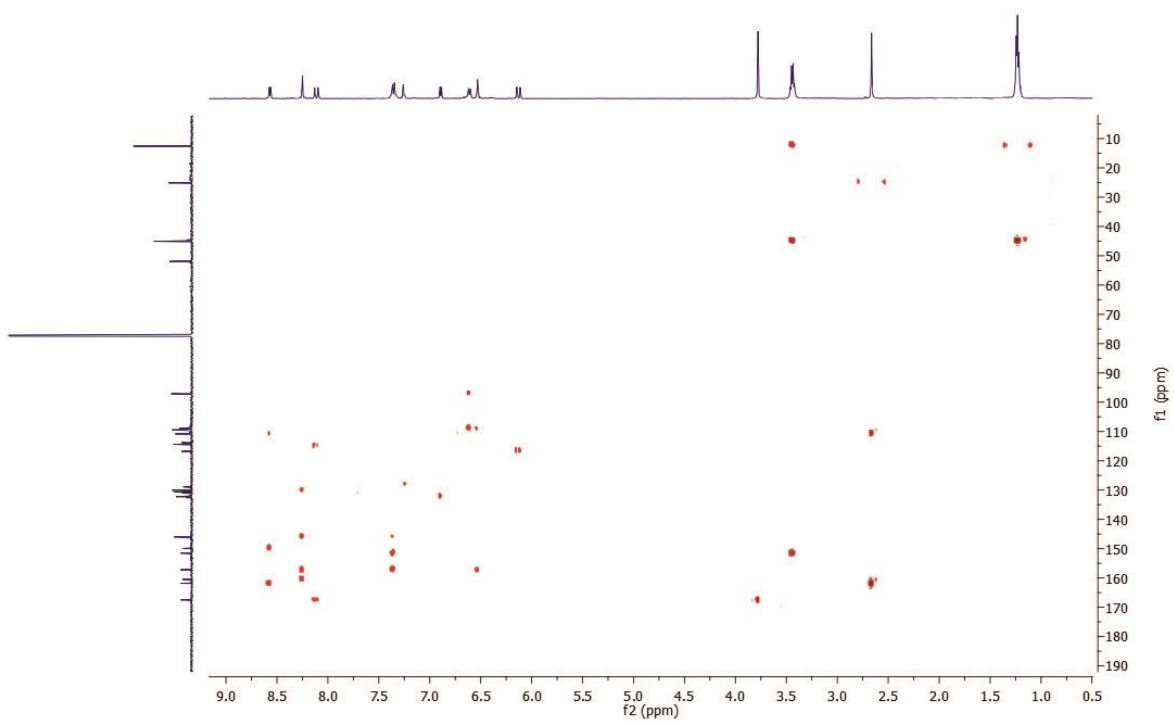

**Figure SI-100.** HMBC NMR spectra of **7d** on  $\text{CDCl}_3$

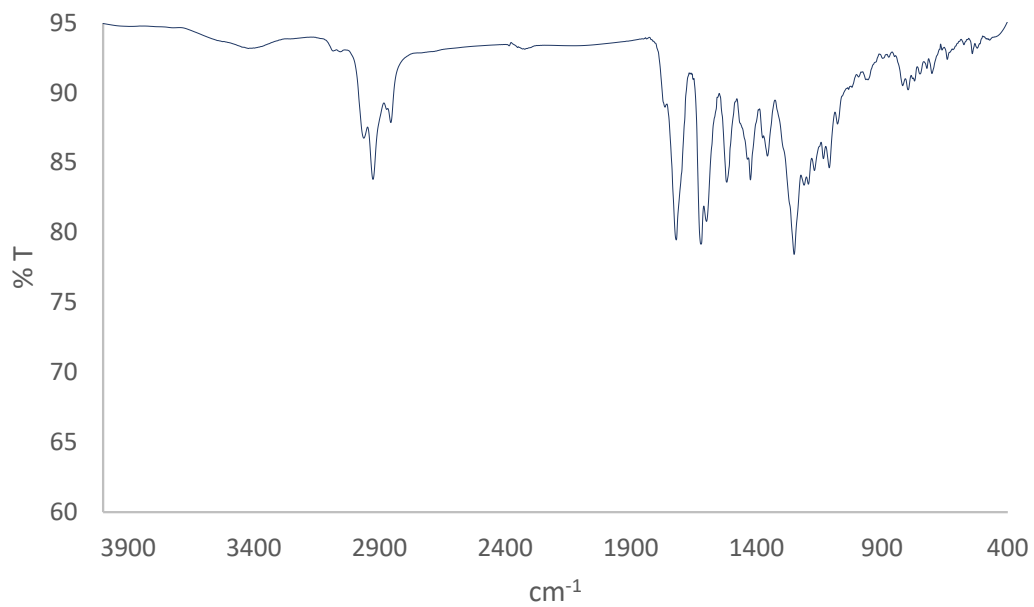

**Figure SI-101.** IR spectra for **7d** in KBr.

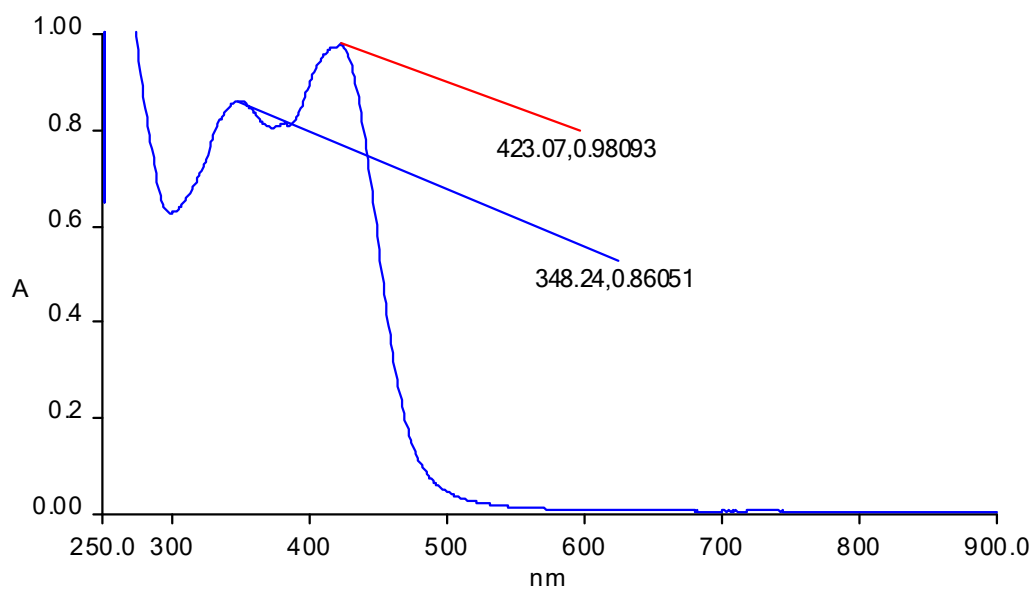

**Figure SI-102.** UV-Vis spectra of **7d** in MeOH.

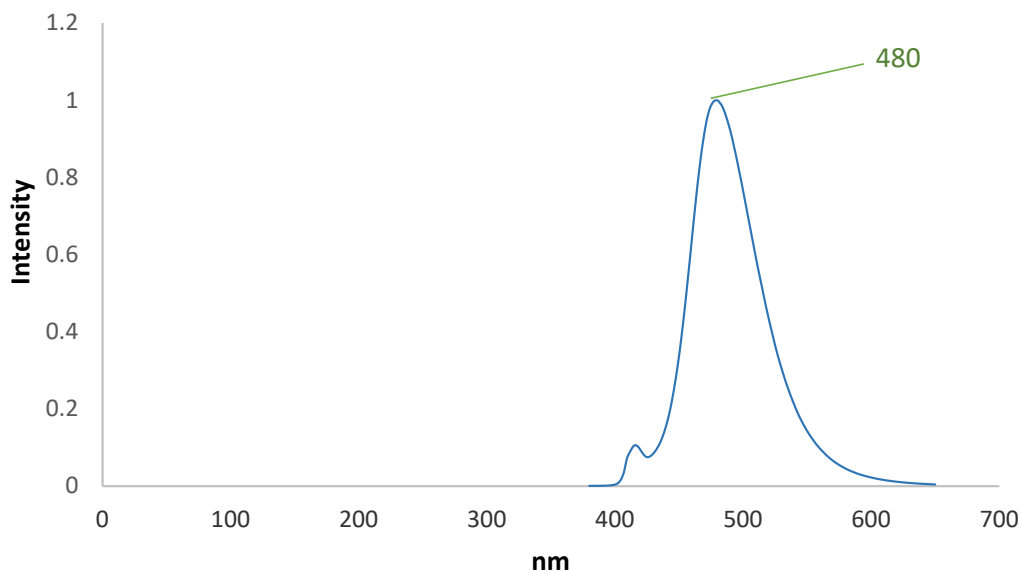

Figure SI-103. Emission spectra of **7d** in MeOH.

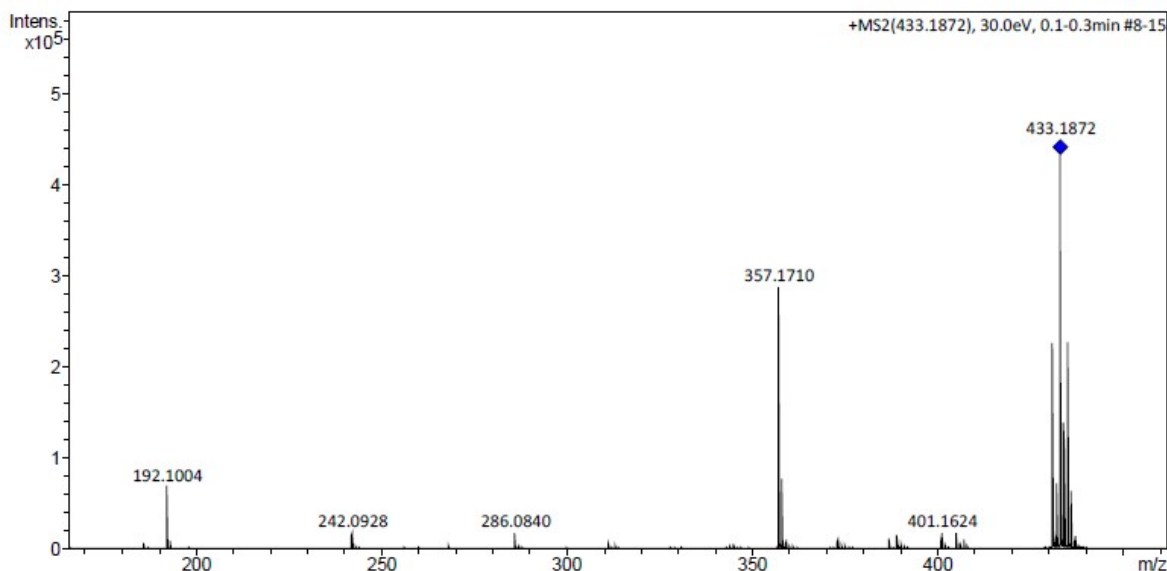

Figure SI-104. ESI-MS chromatogram of **7d**.

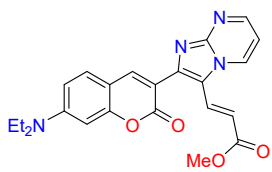

**Methyl (E)-3-(2-(7-(diethylamino)-2-oxo-2H-chromen-3-yl)imidazo[1,2-a]pyrimidin-3-yl)acrylate (7e)**: Yield 43%; yellow powder; m.p. = 262 – 264 °C; RMN <sup>1</sup>H (500 MHz, CDCl<sub>3</sub>, 25 °C, TMS) δ (ppm) = 8.732 (d, *J* (H,H) = 6 Hz, 1H, Ar), 8.602 (d, *J* (H,H) = 4.5 Hz, 1H, Ar), 8.206 (s, 1H,  $\text{-CH=C-}$ ), 8.069 (d, *J* (H,H) = 16.5 Hz, 1H,  $\text{-CH=C-}$ ), 7.342 (d, *J* (H,H) = 9 Hz, 1H, Ar), 7.036 (t, *J* (H,H) = 7 Hz, 1H, Ar), 6.593 (d, *J* (H,H) = 9 Hz, 1H, Ar), 6.500 (s, *J* (H,H) = 7 Hz, 1H, Ar), 6.173 (d, *J* (H,H) = 16.5 Hz, 1H,  $\text{-CH=C-}$ ), 3.744 (s, 1H,  $\text{CH}_3$ ), 3.420 (q, *J* (H,H) = 7 Hz, 4H,  $\text{CH}_2\text{-CH}_3$ ), 1.208 (t, *J* (H,H) = 7 Hz, 6H,  $\text{CH}_3$ ); RMN <sup>13</sup>C (125 MHz, CDCl<sub>3</sub>, 25 °C, TMS) δ (ppm) = 167.278, 160.372, 157.201, 151.571, 151.207, 149.626, 146.19, 146.091,

132.891, 130.199, 130.019, 117.050, 115.356, 113.361, 109.953, 109.441, 108.783, 96.988, 51.895, 45.023, 12.525; FT-IR (KBr)  $\nu_{\max}$  = 3067  $\text{cm}^{-1}$  (C-H Ar), 2968  $\text{cm}^{-1}$  (C-H Aliphatic), 1711  $\text{cm}^{-1}$  (C=O lactone), 1616  $\text{cm}^{-1}$  (-O-C=O), 1588  $\text{cm}^{-1}$  (C=C Ar); UV-Vis (MeOH)  $\lambda_{\max}$  = 422.98 nm; HRMS (ESI m/z) Calcd. for  $\text{C}_{23}\text{H}_{23}\text{N}_4\text{O}_4$   $[\text{M}+\text{H}]^+$  419.1714, found 419.1625.

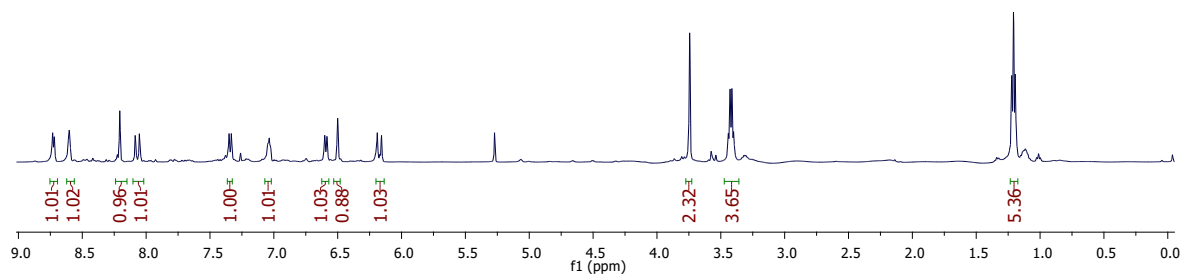

**Figure SI-105.**  $^1\text{H}$  NMR spectra of **7e** on  $\text{CDCl}_3$  500 MHz



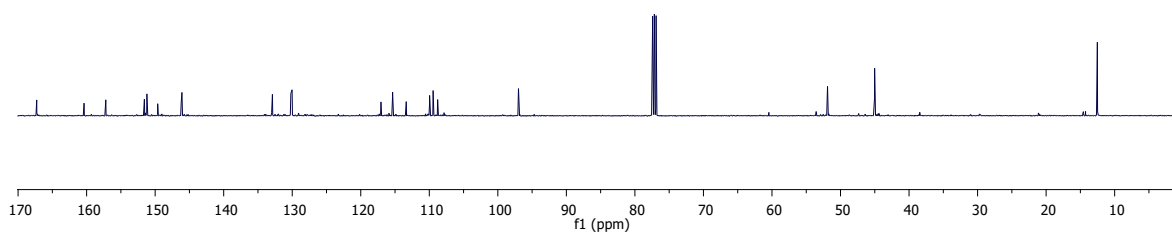

Figure SI-106.  $^{13}\text{C}$  NMR spectra of **7e** on  $\text{CDCl}_3$  125 MHz.

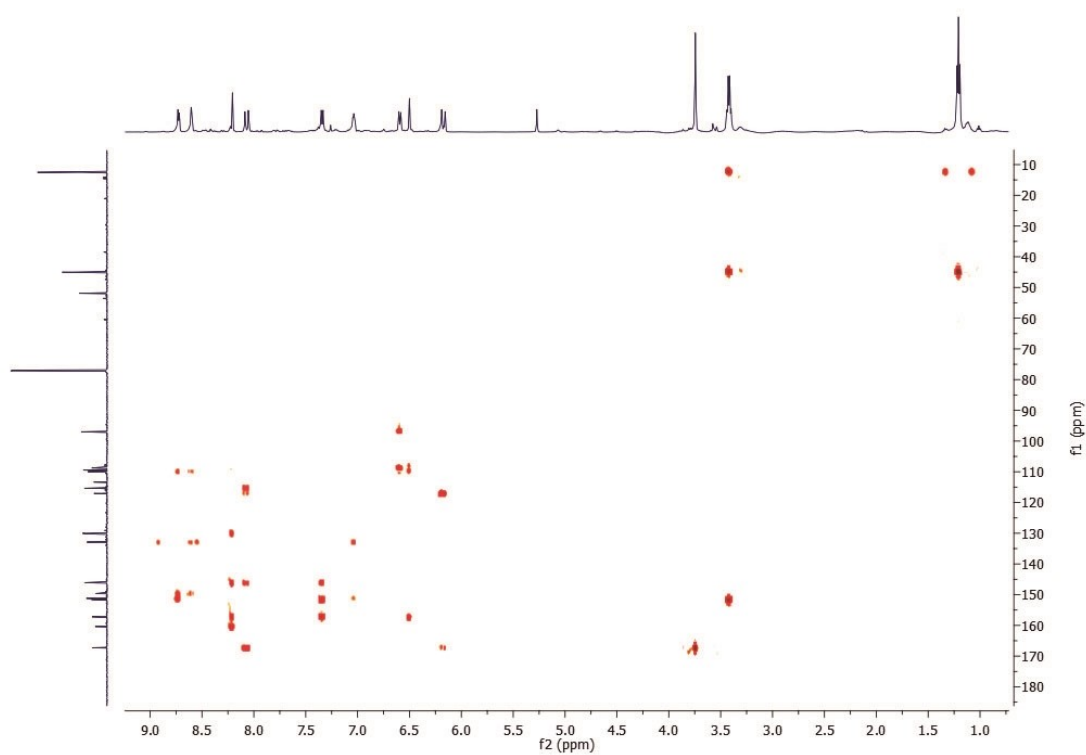

Figure SI-107. HMBC NMR spectra of **7e** on  $\text{CDCl}_3$

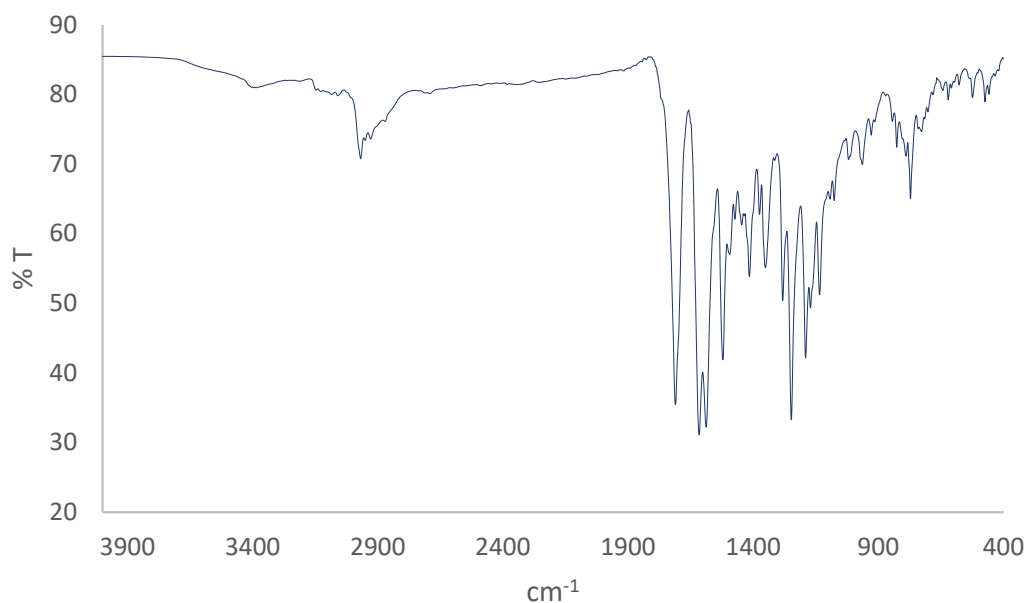

**Figure 108.** IR spectra for **7e** in KBr.

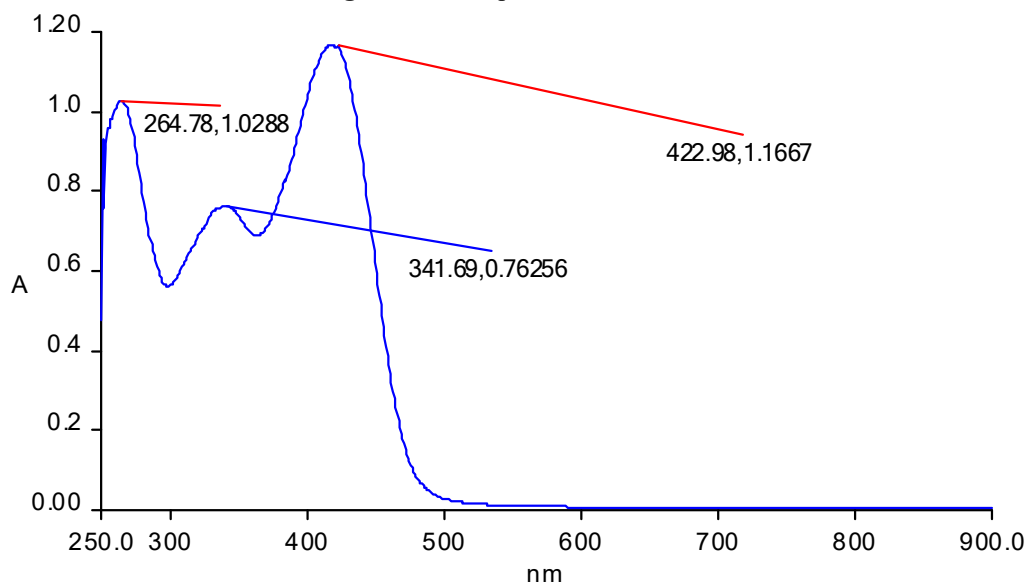

**Figure SI-109.** UV-Vis spectra of **7e** in MeOH.

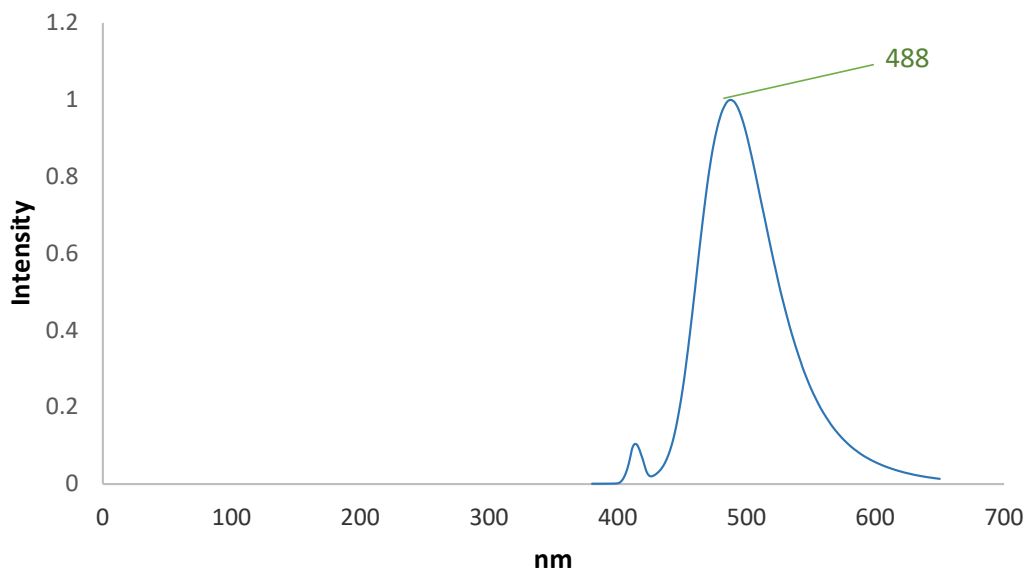

Figure SI-110. Emission spectra of **7e** in MeOH.

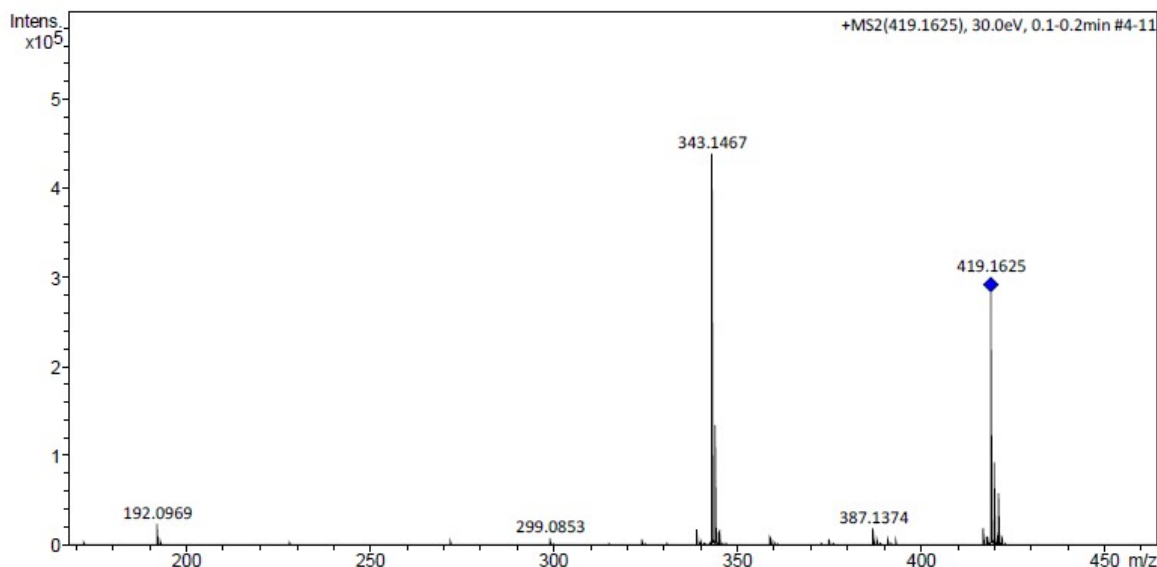

Figure SI-111. ESI-MS chromatogram of **7e**.

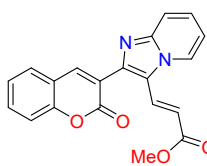

**Methyl (E)-3-(2-(2-oxo-2H-chromen-3-yl)imidazo[1,2-a]pyridin-3-yl)acrylate (7f)**: Yield 81%; light brown powder; m.p. = 208 – 210 °C; RMN  $^1\text{H}$  (500 MHz,  $\text{CDCl}_3$ , 25 °C, TMS)  $\delta$  (ppm) = 8.399 (d,  $J$  (H,H) = 7 Hz, 1H, Ar), 8.162 (s, 1H,  $-\text{CH}=\text{C}-$ ), 7.999 (d,  $J$  (H,H) = 16 Hz, 1H,  $-\text{CH}=\text{C}-$ ), 7.684 (d,  $J$  (H,H) = 9 Hz, 1H, Ar), 7.571 (m, 2H, H-7', Ar), 7.395 – 7.303 (m, 3H, Ar), 7.001 (t,  $J$  (H,H) = 7 Hz, 1H, Ar), 6.221 (d,  $J$  (H,H) = 16 Hz, 1H,  $-\text{CH}=\text{C}-$ ), 3.762 (s, 1H,  $\text{CH}_3$ ); RMN  $^{13}\text{C}$  (125 MHz,  $\text{CDCl}_3$ , 25 °C, TMS)  $\delta$  (ppm) = 167.425, 159.441, 154.189, 147.052, 144.749, 143.339, 132.505, 129.849, 128.572, 126.983, 125.198, 124.850, 122.441, 119.378, 119.153, 118.373, 116.802, 115.267, 114.399, 51.909; FT-IR (KBr)  $\nu_{\text{max}}$  = 3071  $\text{cm}^{-1}$  (C–H Ar), 2940  $\text{cm}^{-1}$  (C–H Aliphatic), 1724  $\text{cm}^{-1}$  (C=O lactone), 1705  $\text{cm}^{-1}$  ( $-\text{O}-\text{C}=\text{O}$ ), 1623  $\text{cm}^{-1}$  (C=C Ar);

UV-Vis (MeOH)  $\lambda_{\text{max}} = 330.17 \text{ nm}$ ; HRMS (ESI m/z) Calcd. for  $\text{C}_{20}\text{H}_{15}\text{N}_2\text{O}_4$   $[\text{M}+\text{H}]^+$  347.1026, found 347.1032.

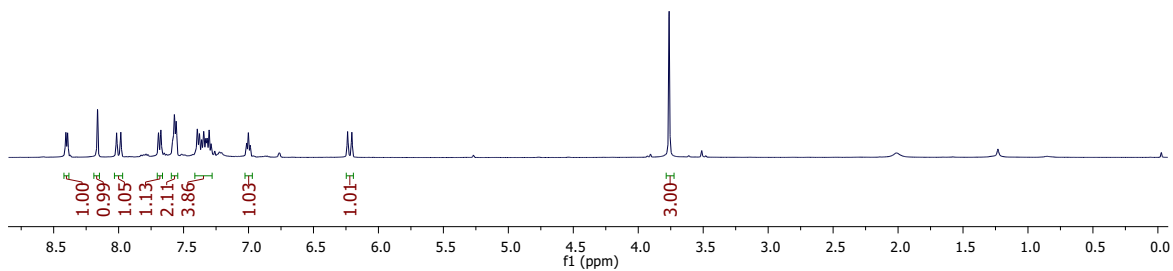

**Figure SI-112.**  $^1\text{H}$  NMR spectra of **7f** on  $\text{CDCl}_3$  500 MHz

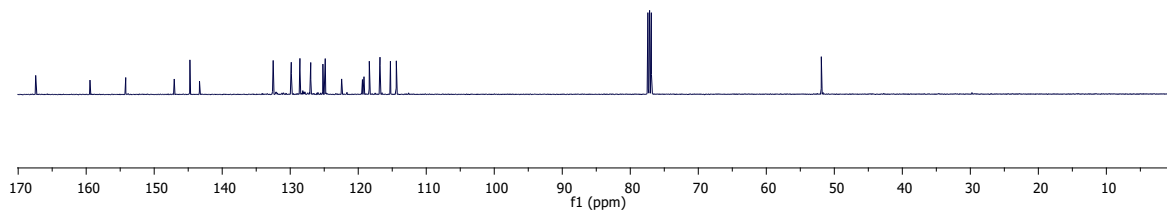

Figure SI-113.  $^{13}\text{C}$  NMR spectra of **7f** on  $\text{CDCl}_3$  125 MHz.

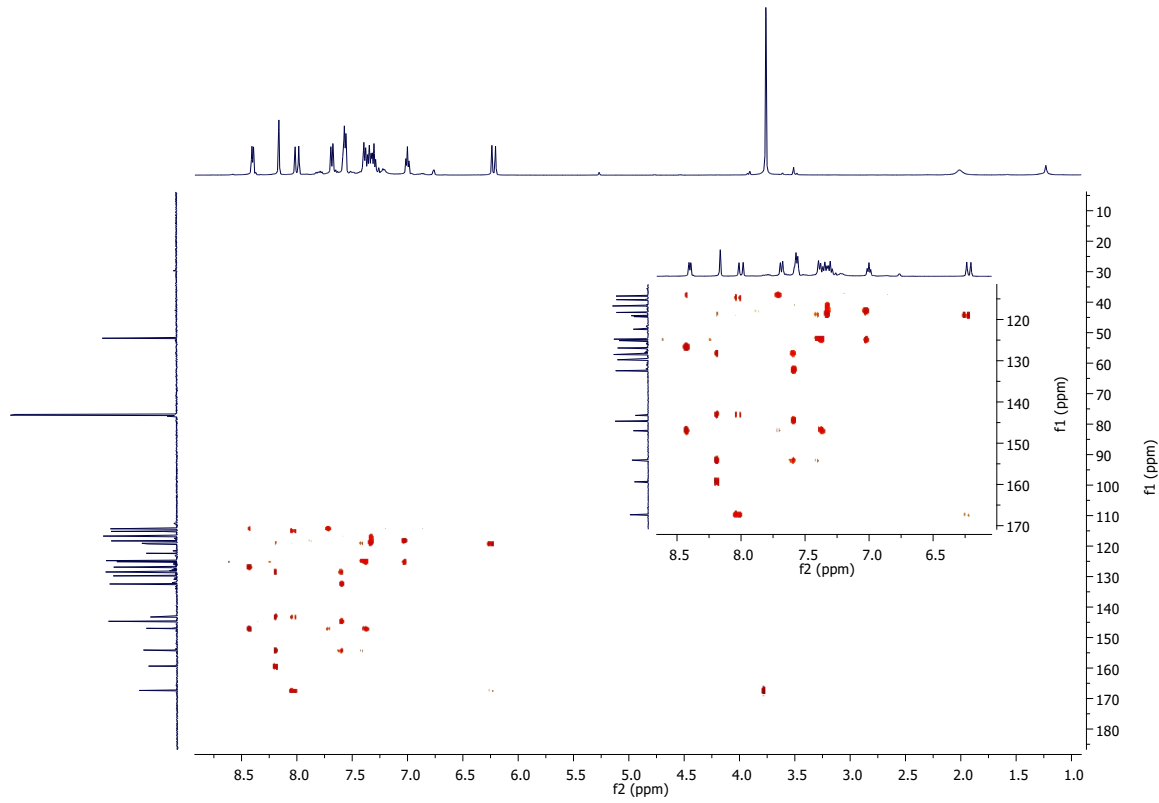

Figure SI-114. HMBC NMR spectra of **7f** on  $\text{CDCl}_3$

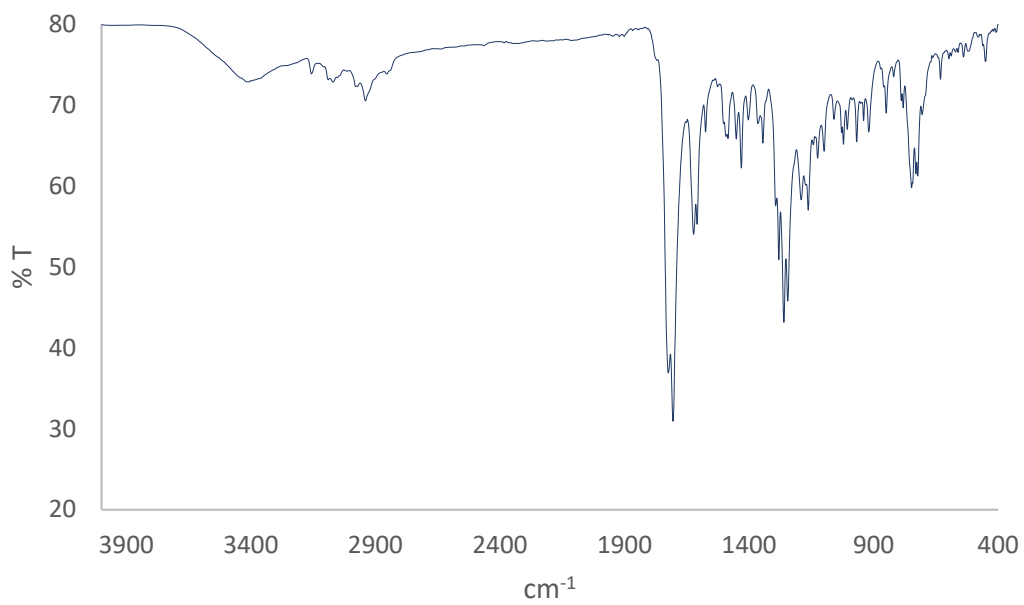

Figure SI-115. IR spectra for **7f** in KBr.

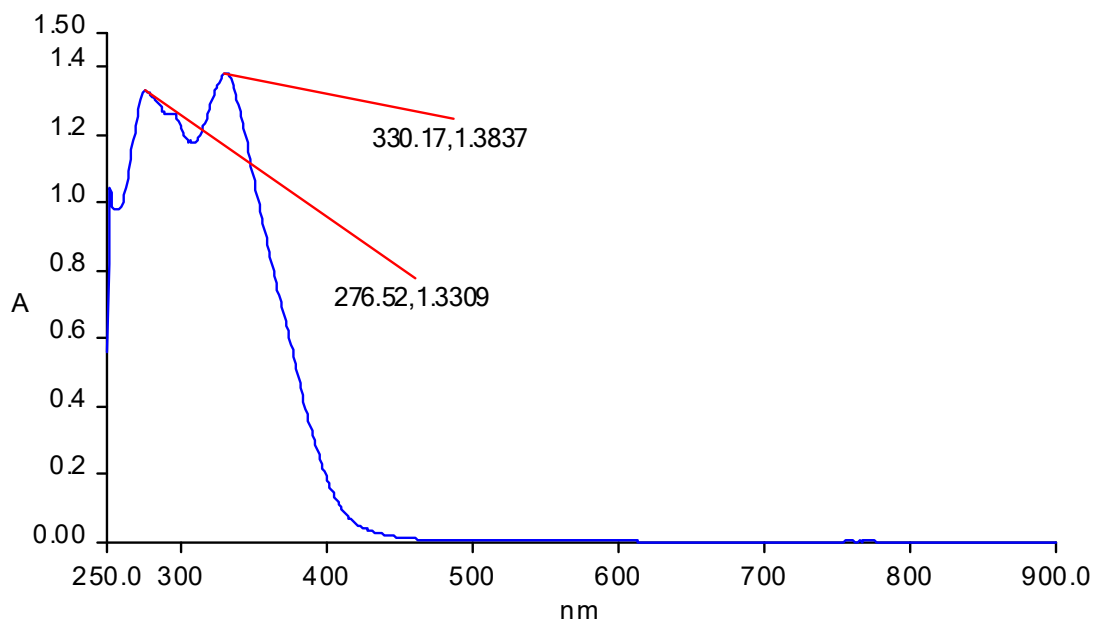

Figure SI-116. UV-Vis spectra of **7f** in MeOH.

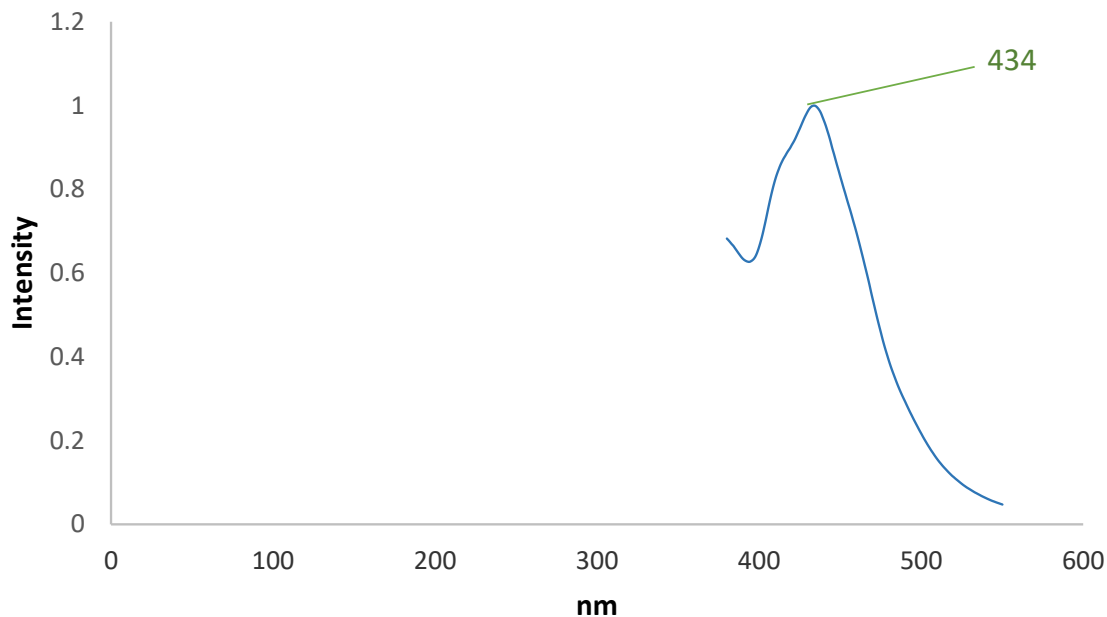

Figure SI-117. Emission spectra of **7f** in MeOH.

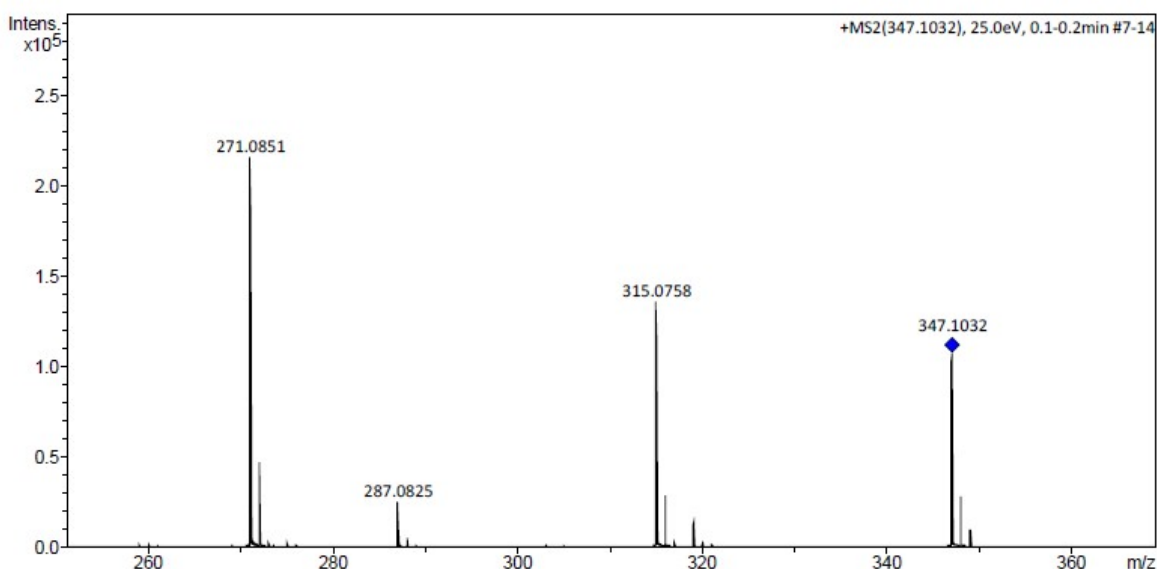

Figure SI-118. ESI-MS chromatogram of **7f**.

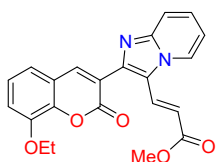

**Methyl (E)-3-(2-(8-ethoxy-2-oxo-2H-chromen-3-yl)imidazo[1,2-a]pyridin-3-yl)acrylate (7g):** Yield 71%; dark brown powder; m.p. = 137 – 141 °C; RMN  $^1\text{H}$  (500 MHz,  $\text{CDCl}_3$ , 25 °C, TMS)  $\delta$  (ppm) = 8.428 (d,  $J$  (H,H) = 6.5 Hz, 1H, Ar), 8.180 (s, 1H,  $-\text{CH}=\text{C}-$ ), 8.019 (d,  $J$  (H,H) = 16 Hz, 1H,  $-\text{CH}=\text{C}-$ ), 7.713 (d,  $J$  (H,H) = 9 Hz, 1H, Ar), 7.373 (d,  $J$  (H,H) = 7 Hz, 1H, Ar), 7.227 (d,  $J$  (H,H) = 8 Hz, 1H, Ar), 7.157 – 7.140 (m, 2H, Ar), 7.027 (t,  $J$  (H,H) = 7 Hz, 1H, Ar), 7.231 (d,  $J$  (H,H) = 16 Hz, 1H,  $-\text{CH}=\text{C}-$ ), 4.226 (q,  $J$  (H,H) = 7 Hz, 2H,  $\text{CH}_2-\text{CH}_3$ ), 3.788 (s, 1H,  $\text{CH}_3$ ), 1.538 (t,  $J$  (H,H) = 7 Hz, 3H,  $\text{CH}_3$ ); RMN  $^{13}\text{C}$  (125 MHz,  $\text{CDCl}_3$ , 25 °C, TMS)  $\delta$  (ppm) = 167.460, 159.120, 147.080, 146.631, 145.059, 144.059, 143.303, 129.954, 126.950, 125.220,

124.732, 122.701, 119.957, 119.914, 119.463, 118.408, 115.499, 114.322, 65.173, 51.940, 14.909;  
FT-IR (KBr)  $\nu_{\text{max}} = 2926 \text{ cm}^{-1}$  (C-H Aliphatic),  $1720 \text{ cm}^{-1}$  (C=O lactone),  $1621 \text{ cm}^{-1}$  (-O-C=O);  
UV-Vis (MeOH)  $\lambda_{\text{max}} = 314.90 \text{ nm}$ ; HRMS (ESI m/z) Calcd. for  $\text{C}_{22}\text{H}_{19}\text{N}_2\text{O}_5$   $[\text{M}+\text{H}]^+$  391.1288, found 391.1299.

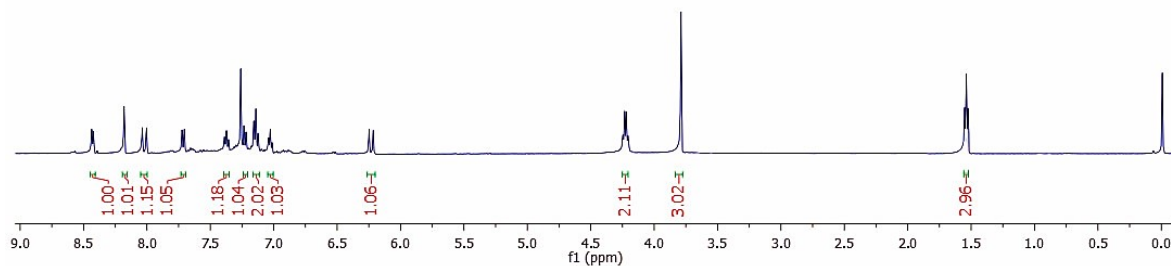

Figure SI-119.  $^1\text{H}$  NMR spectra of **7g** on  $\text{CDCl}_3$  500 MHz

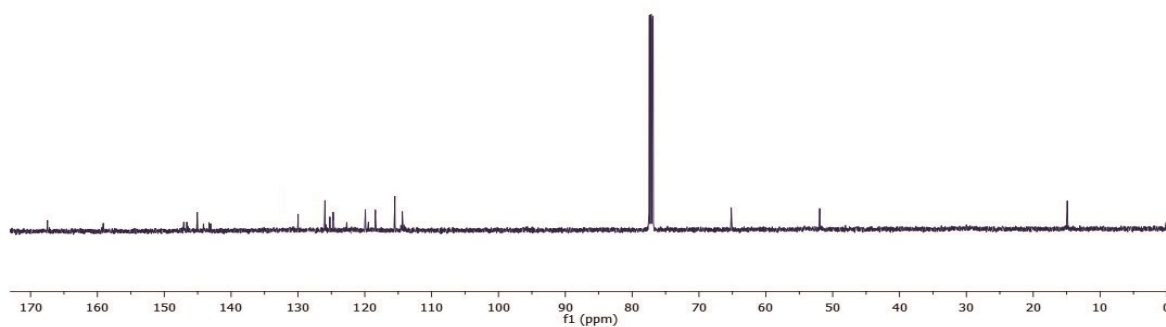

Figure SI-120.  $^{13}\text{C}$  NMR spectra of **7g** on  $\text{CDCl}_3$  125 MHz.



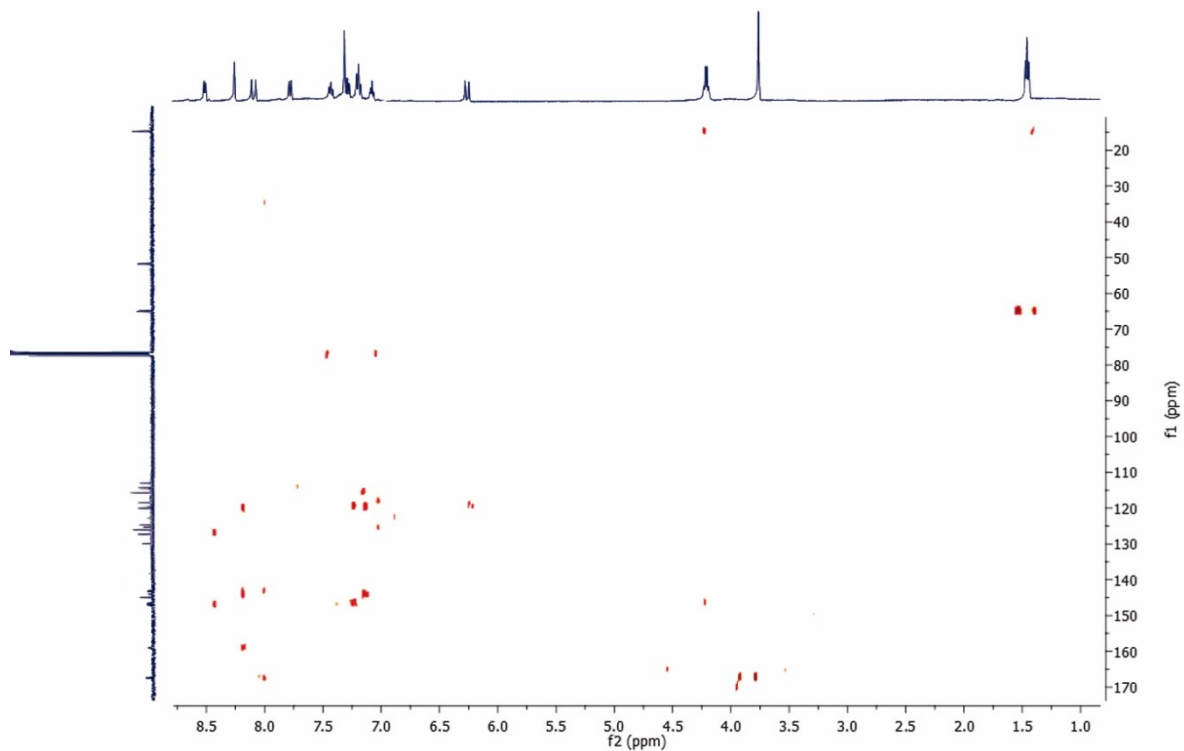

Figure SI-121. HMBC NMR spectra of **7g** on  $\text{CDCl}_3$

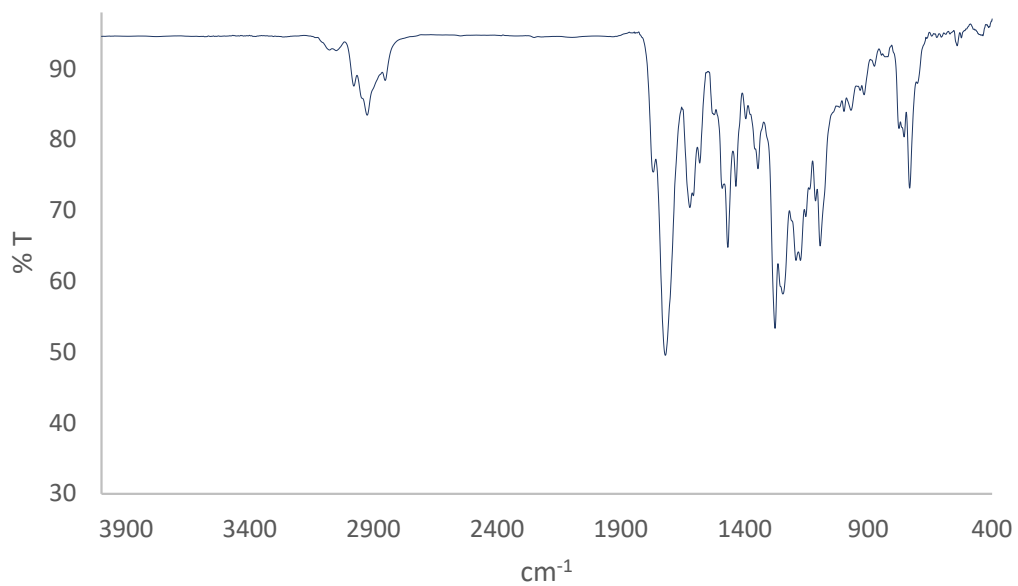

Figure SI-122. IR spectra for **7g** in KBr.

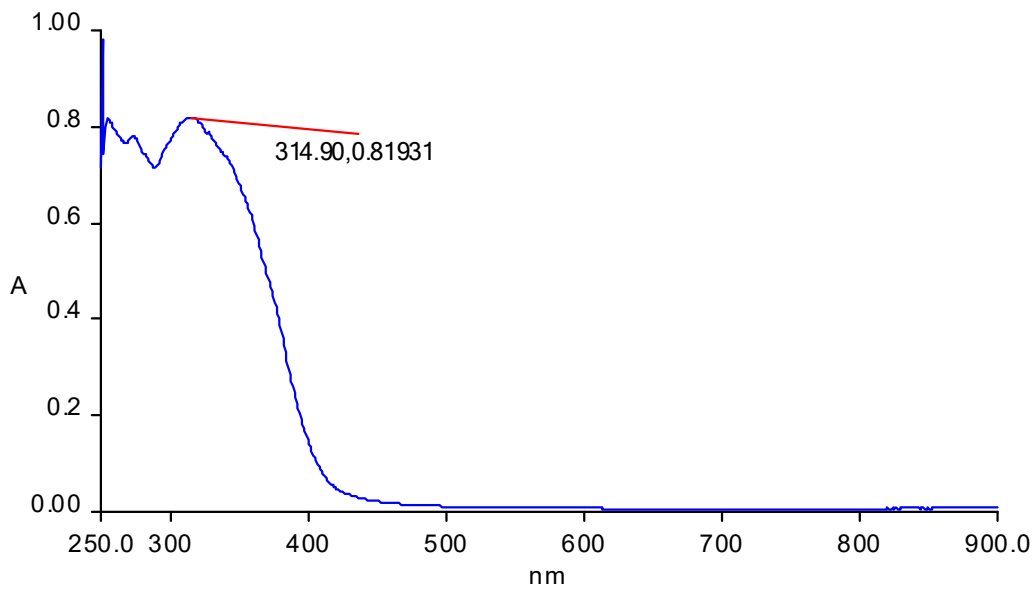

Figure SI-123. UV-Vis spectra of 7g in MeOH.

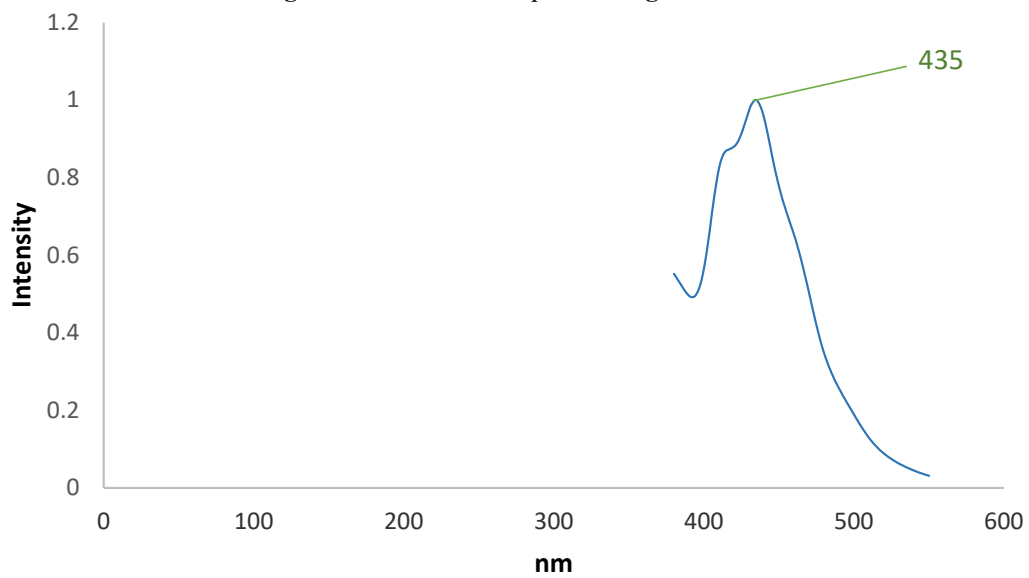

Figure SI-124. Emission spectra of 7g in MeOH.

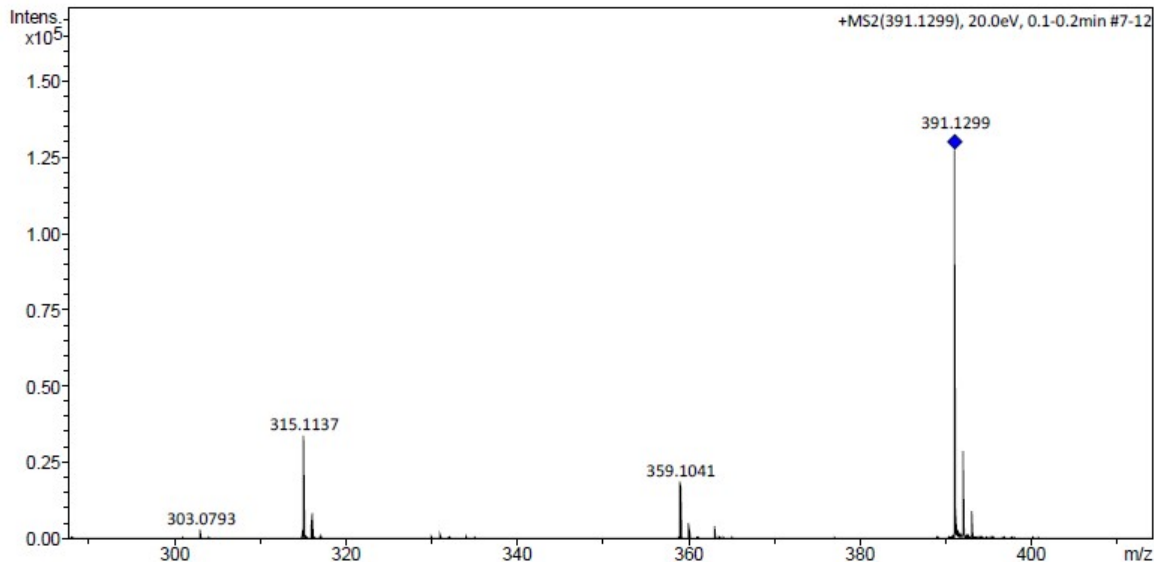

Figure SI-125. ESI-MS chromatogram of 7g.

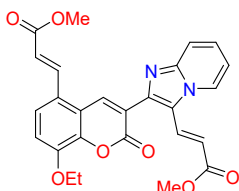

**Methyl (E)-3-(8-ethoxy-3-(3-((E)-3-methoxy-3-oxoprop-1-en-1-yl)imidazo[1,2-a]pyridin-2-yl)-2-oxo-2H-chromen-5-yl)acrylate (7h):** Yield 61%; dark brown powder; m.p. = 179 – 181 °C; RMN <sup>1</sup>H (500 MHz, CDCl<sub>3</sub>, 25 °C, TMS) δ (ppm) = 8.557 (s, 1H,  $-\underline{\text{C}}\text{H}=\text{C}-$ ), 8.432 (d,  $J$  (H,H) = 7 Hz, 1H, Ar), 8.121 (d,  $J$  (H,H) = 15.5 Hz, 1H,  $-\underline{\text{C}}\text{H}=\text{C}-$ ), 8.015 (d,  $J$  (H,H) = 16.5 Hz, 1H,  $-\underline{\text{C}}\text{H}=\text{C}-$ ), 7.729 (d,  $J$  (H,H) = 9 Hz, 1H, Ar), 7.532 (d,  $J$  (H,H) = 8.5 Hz, 1H, Ar), 7.393 (t,  $J$  (H,H) = 8 Hz, 1H, Ar), 7.134 (d,  $J$  (H,H) = 8.5 Hz, 1H, Ar), 7.042 (t,  $J$  (H,H) = 7 Hz, 1H, Ar), 6.414 (d,  $J$  (H,H) = 15.5 Hz, 1H,  $-\underline{\text{C}}\text{H}=\text{C}-$ ), 6.224 (d,  $J$  (H,H) = 16.5 Hz, 1H,  $-\underline{\text{C}}\text{H}=\text{C}-$ ), 4.256 (q,  $J$  (H,H) = 7 Hz, 2H,  $\underline{\text{C}}\text{H}_2-\text{CH}_3$ ), 3.796 (s, 3H,  $\underline{\text{C}}\text{H}_3$ ), 3.788 (s, 3H,  $\underline{\text{C}}\text{H}_3$ ), 1.553 (t,  $J$  (H,H) = 7 Hz, 3H,  $\underline{\text{C}}\text{H}_3$ ); RMN <sup>13</sup>C (125 MHz, CDCl<sub>3</sub>, 25 °C, TMS) δ (ppm) = 123.428, 167.384, 166.963, 158.365, 147.943, 147.103, 144.360, 142.923, 140.950, 138.753, 129.872, 127.096, 125.203, 124.553, 123.406, 120.420, 119.650, 118.514, 118.493, 115.786, 114.875, 114.517, 65.281, 51.988, 14.823; FT-IR (KBr)  $\nu_{\text{max}}$  = 3045 cm<sup>-1</sup> (C–H Ar), 2978 cm<sup>-1</sup> (C–H Aliphatic), 1718 cm<sup>-1</sup> (C=O lactone), 1631 cm<sup>-1</sup> ( $-\text{O}-\underline{\text{C}}=\text{O}$ ); UV-Vis (MeOH)  $\lambda_{\text{max}}$  = 328.33 nm. HRMS (ESI m/z) Calcd. for C<sub>26</sub>H<sub>22</sub>N<sub>2</sub>O<sub>7</sub> [M+H]<sup>+</sup> 475.1500, found 475.1526.

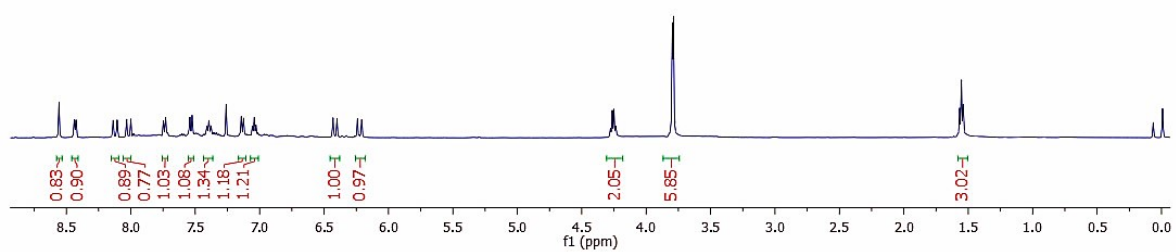

Figure SI-126. <sup>1</sup>H NMR spectra of **7h** on CDCl<sub>3</sub> 500 MHz

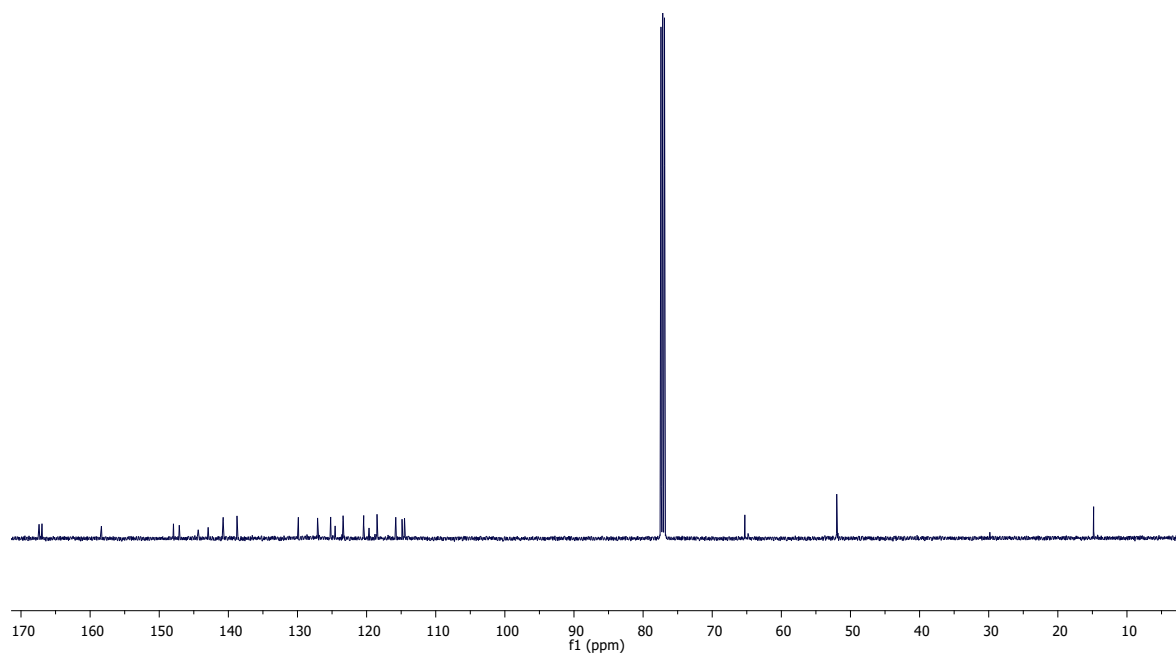

Figure SI-127. <sup>13</sup>C NMR spectra of **7h** on CDCl<sub>3</sub> 125 MHz.

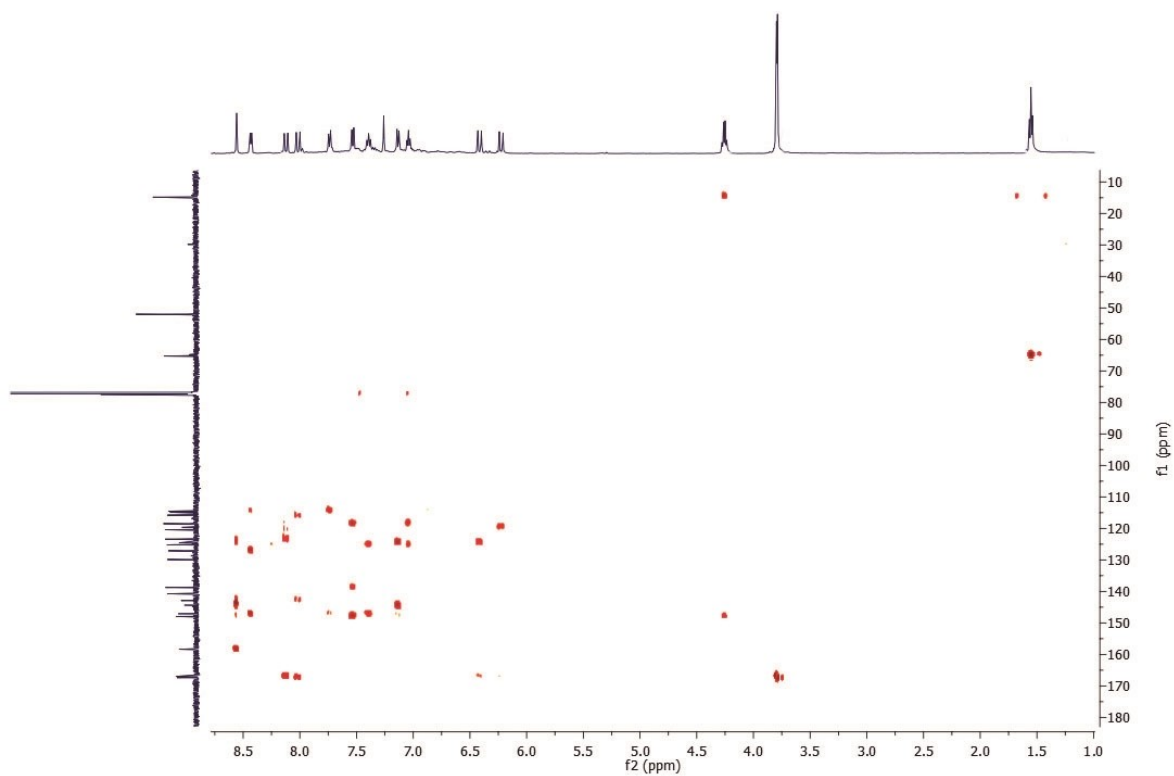

Figure SI-128. HMBC NMR spectra of **7h** on  $\text{CDCl}_3$

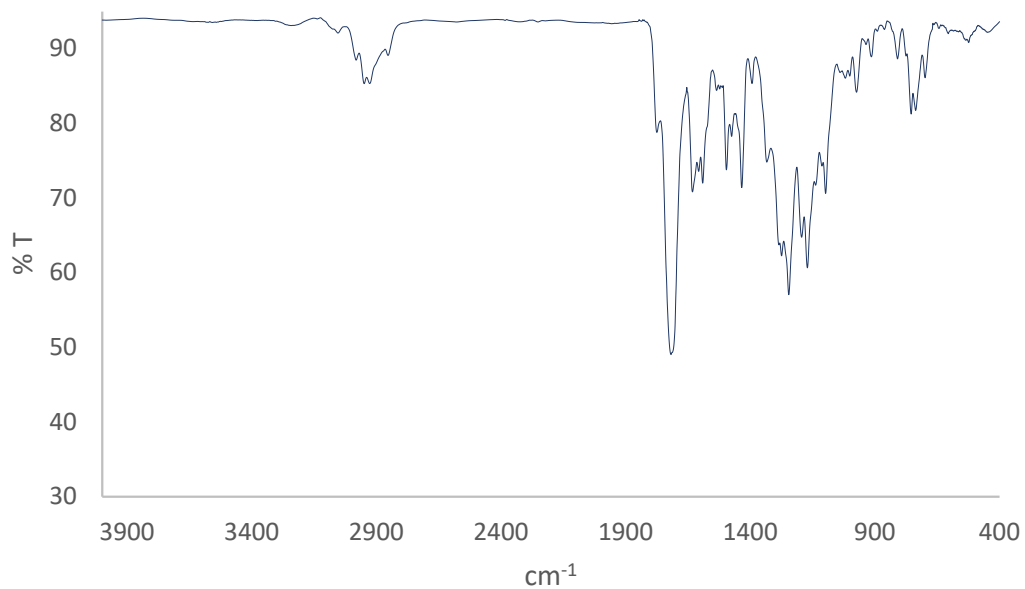

Figure SI-129. IR spectra for **7h** in KBr.

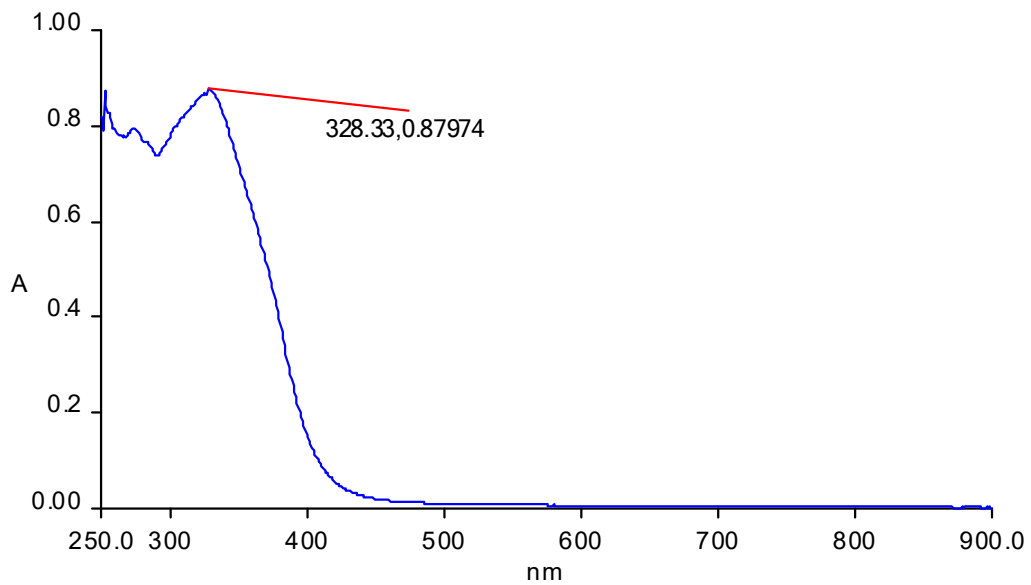

Figure SI-130. UV-Vis spectra of 7h in MeOH.

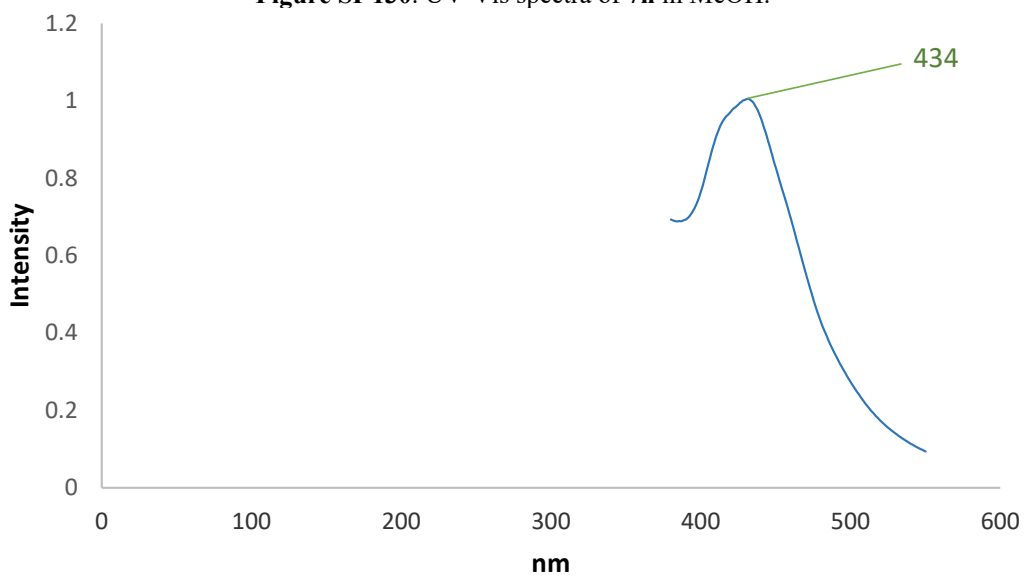

Figure SI-131. Emission spectra of 7h in MeOH.

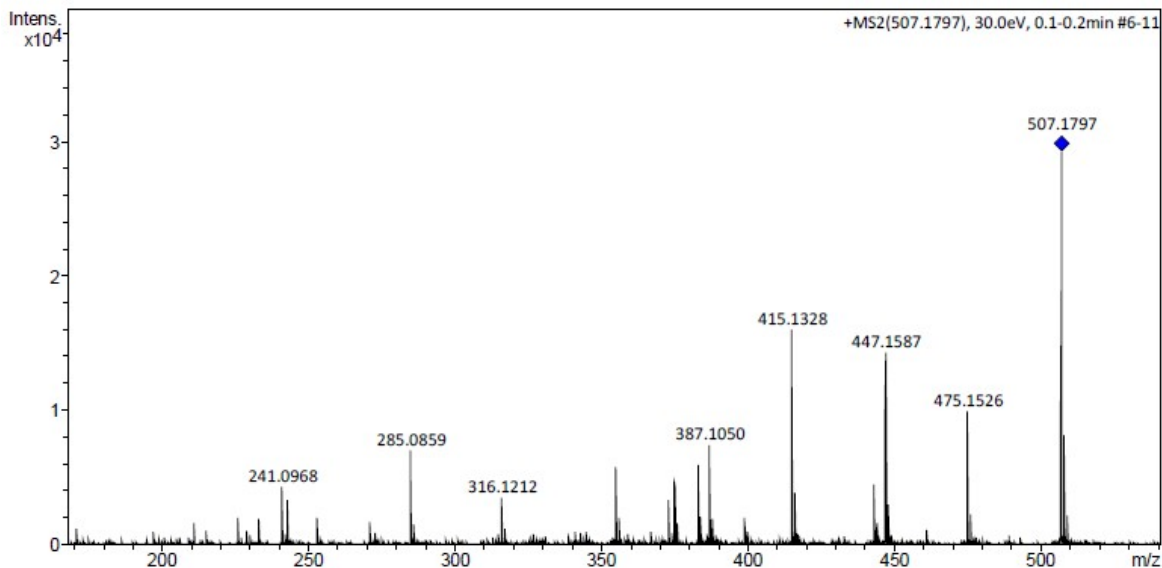

Figure SI-132. ESI chromatogram of 7h.

## 6. Nonlinear optical properties

Table S3. Non-linear refractive index values of coumarin-imidazo[1,2-*a*]heterocyclic-3-acrylate 7a-h.

| Power (mW) | Nonlinear refraction index $n_2$ (W/cm <sup>2</sup> ) |                         |                        |                        |                        |                        |                        |                        |                        |                        |
|------------|-------------------------------------------------------|-------------------------|------------------------|------------------------|------------------------|------------------------|------------------------|------------------------|------------------------|------------------------|
|            | 4a                                                    | 5a                      | 7a                     | 7b                     | 7c                     | 7d                     | 7e                     | 7f                     | 7g                     | 7h                     |
| 1          | -7.403e <sup>-7</sup>                                 |                         |                        |                        |                        |                        |                        |                        |                        |                        |
| 3          | -1.22e <sup>-7</sup>                                  |                         |                        |                        |                        |                        |                        |                        |                        |                        |
| 4          | -7.7218e <sup>-8</sup>                                |                         |                        |                        |                        |                        |                        |                        |                        |                        |
| 5          | -6.332e <sup>-8</sup>                                 |                         |                        | -1.994e <sup>-9</sup>  |                        |                        |                        |                        |                        |                        |
| 7          | -1.179e <sup>-8</sup>                                 |                         |                        | -1.616e <sup>-08</sup> |                        |                        |                        |                        |                        |                        |
| 10         |                                                       |                         |                        | -7.514e <sup>-09</sup> | -2.622e <sup>-09</sup> | -9.499e <sup>-10</sup> | -1.324e <sup>-08</sup> |                        |                        | -2.188e <sup>-09</sup> |
| 15         |                                                       |                         | -2.486e <sup>-09</sup> | -4.133e <sup>-09</sup> | -2.215e <sup>-09</sup> | -4.557e <sup>-10</sup> | -3.252e <sup>-09</sup> |                        |                        | -1.198e <sup>-09</sup> |
| 20         |                                                       |                         | -1.507e <sup>-09</sup> |                        | -1.210e <sup>-09</sup> | -8.254e <sup>-10</sup> | -1.656e <sup>-09</sup> |                        |                        | -6.373e <sup>-10</sup> |
| 25         |                                                       | -2.1424e <sup>-10</sup> | -1.184e <sup>-09</sup> |                        |                        |                        |                        |                        |                        | -4.795e <sup>-10</sup> |
| 30         |                                                       | -1.1188e <sup>-10</sup> | -8.832e <sup>-10</sup> | -9.553e <sup>-10</sup> | -8.475e <sup>-10</sup> |                        |                        |                        | -2.267e <sup>-10</sup> | -3.688e <sup>-10</sup> |
| 35         |                                                       | -2.6887e <sup>-10</sup> | -7.719e <sup>-10</sup> | -5.532e <sup>-10</sup> |                        |                        |                        |                        | -1.634e <sup>-10</sup> |                        |
| 40         |                                                       | -1.824e <sup>-10</sup>  |                        |                        | -5.721e <sup>-10</sup> |                        |                        | -1.569e <sup>-10</sup> | -1.290e <sup>-10</sup> | -3.146e <sup>-10</sup> |
| 45         |                                                       | -1.621e <sup>-10</sup>  |                        |                        |                        |                        |                        | -1.254e <sup>-10</sup> | -1.491e <sup>-10</sup> |                        |
| 50         |                                                       |                         |                        |                        |                        |                        |                        | -1.112e <sup>-10</sup> | -1.243e <sup>-10</sup> |                        |
| 55         |                                                       |                         |                        |                        |                        |                        |                        |                        | -9.896e <sup>-11</sup> |                        |

## 7.- Theoretical calculations

*Computational Details.*

The stationary points of all molecules were obtained by Berny geometry optimization using the Density Functional Theory (DFT). To test the performance of the level of theory against the experimental absorption-emission data, four DFT functionals were used: B3LYP [4,5], CAM-B3LYP [6], PBE [7] (PBEPBE) and M062XR [8] with the basis set 6-311++g(d,p) [9], the Polarizable Continuum Model (PCM) [10,11]. with methanol as solvent was used, all stationary points were confirmed with a frequency analysis. The theoretical characterization of the optical properties were performed using the Time Dependent Density Functional Theory (TD-DFT) [12]. We have performed vertical excitation of all the molecules using TD-DFT at the corresponding theory level of the respective optimization calculation. In addition, the relaxation of the brighter excited states in the gas phase was performed using TD-DFT at corresponding level to that of its fundamental geometry stationary point. Similarly, the theoretical calculation of polarizability and hyperpolarizability was made. All calculations were done using the Gaussian09 software [13].

### 8.- Equilibrium Geometry in Ground State, Equilibrium Geometry in Excited states, Excitation energies and oscillator strength of compound 7a (B3LYP)

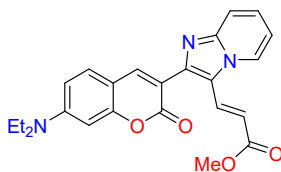

7a

B3LYP

Standard orientation:

| Center Number | Atomic Number | Atomic Type | Coordinates (Angstroms) |           |           |
|---------------|---------------|-------------|-------------------------|-----------|-----------|
|               |               |             | X                       | Y         | Z         |
| 1             | 6             | 0           | 4.597339                | -0.346524 | -0.178995 |
| 2             | 6             | 0           | 3.583912                | 0.318825  | 0.554517  |
| 3             | 6             | 0           | 2.268361                | -0.084203 | 0.434986  |
| 4             | 6             | 0           | 1.862884                | -1.146831 | -0.394390 |
| 5             | 6             | 0           | 2.877632                | -1.806859 | -1.123080 |
| 6             | 6             | 0           | 4.194480                | -1.428834 | -1.025876 |
| 7             | 1             | 0           | 3.805590                | 1.130209  | 1.231006  |
| 8             | 1             | 0           | 2.603404                | -2.625927 | -1.778838 |
| 9             | 1             | 0           | 4.927516                | -1.955642 | -1.618172 |
| 10            | 6             | 0           | 0.485667                | -1.464123 | -0.444542 |
| 11            | 6             | 0           | -0.454689               | -0.770254 | 0.277149  |
| 12            | 6             | 0           | -0.021404               | 0.291737  | 1.168878  |
| 13            | 8             | 0           | 1.335559                | 0.589138  | 1.177980  |
| 14            | 1             | 0           | 0.158558                | -2.280675 | -1.078849 |
| 15            | 6             | 0           | -3.027309               | -0.388957 | 0.112442  |
| 16            | 6             | 0           | -3.497975               | -2.586482 | 0.120210  |
| 17            | 7             | 0           | -2.166051               | -2.505354 | 0.208726  |
| 18            | 6             | 0           | -1.866769               | -1.183860 | 0.224975  |
| 19            | 7             | 0           | -4.077286               | -1.315349 | 0.067458  |
| 20            | 6             | 0           | -4.325147               | -3.724454 | 0.097533  |



|    |   |   |           |           |           |
|----|---|---|-----------|-----------|-----------|
| 21 | 6 | 0 | -5.688427 | -3.562735 | 0.040586  |
| 22 | 1 | 0 | -6.340033 | -4.427247 | 0.022118  |
| 23 | 6 | 0 | -6.247793 | -2.261400 | 0.019436  |
| 24 | 1 | 0 | -7.319826 | -2.120225 | -0.003066 |
| 25 | 6 | 0 | -5.441514 | -1.157981 | 0.037674  |
| 26 | 1 | 0 | -5.827184 | -0.153799 | 0.054233  |
| 27 | 1 | 0 | -3.858535 | -4.700019 | 0.131391  |
| 28 | 7 | 0 | 5.906144  | 0.029228  | -0.085610 |
| 29 | 6 | 0 | 6.985196  | -0.716984 | -0.746046 |
| 30 | 1 | 0 | 7.879597  | -0.594592 | -0.131336 |
| 31 | 1 | 0 | 6.753502  | -1.782982 | -0.727618 |
| 32 | 6 | 0 | 7.274185  | -0.248563 | -2.175503 |
| 33 | 1 | 0 | 6.406162  | -0.384561 | -2.824586 |
| 34 | 1 | 0 | 7.549601  | 0.809045  | -2.192309 |
| 35 | 1 | 0 | 8.106368  | -0.821646 | -2.593407 |
| 36 | 6 | 0 | 6.323831  | 1.199206  | 0.696113  |
| 37 | 1 | 0 | 7.224350  | 1.596096  | 0.222435  |
| 38 | 1 | 0 | 5.568170  | 1.981576  | 0.606294  |
| 39 | 6 | 0 | 6.610079  | 0.887014  | 2.168433  |
| 40 | 1 | 0 | 6.939113  | 1.793533  | 2.683595  |
| 41 | 1 | 0 | 5.721413  | 0.508379  | 2.678208  |
| 42 | 1 | 0 | 7.400998  | 0.138515  | 2.262169  |
| 43 | 8 | 0 | -0.712994 | 0.946098  | 1.925777  |
| 44 | 6 | 0 | -3.097529 | 1.024236  | -0.071681 |
| 45 | 6 | 0 | -4.130102 | 1.822256  | -0.439024 |
| 46 | 6 | 0 | -4.001493 | 3.270839  | -0.613564 |
| 47 | 8 | 0 | -4.919373 | 3.987816  | -0.983967 |
| 48 | 8 | 0 | -2.773355 | 3.755437  | -0.329057 |
| 49 | 6 | 0 | -2.585766 | 5.175471  | -0.485894 |
| 50 | 1 | 0 | -1.552327 | 5.363071  | -0.204557 |
| 51 | 1 | 0 | -2.756959 | 5.471473  | -1.521500 |
| 52 | 1 | 0 | -3.263138 | 5.724856  | 0.168668  |
| 53 | 1 | 0 | -5.121531 | 1.462274  | -0.668467 |
| 54 | 1 | 0 | -2.149062 | 1.517457  | 0.096685  |

-----  
Rotational constants (GHZ): 0.2218649 0.0648972 0.0538852

Excitation energies and oscillator strengths:

Excited State 1: Singlet-A 2.9247 eV 423.92 nm f=0.6876 <S\*\*2>=0.000  
110 ->111 0.69871

This state for optimization and/or second-order correction.

Total Energy, E(TD-HF/TD-KS) = -1393.85529913

Copying the excited state density for this state as the 1-particle RhoCI density.

Excited State 2: Singlet-A 3.1591 eV 392.46 nm f=0.2270 <S\*\*2>=0.000  
109 ->111 -0.27309  
110 ->112 0.64086

Excited State 3: Singlet-A 3.4174 eV 362.81 nm f=0.3052 <S\*\*2>=0.000  
109 ->111 0.60016

|                   |           |           |           |          |              |
|-------------------|-----------|-----------|-----------|----------|--------------|
|                   |           | 109 ->112 | 0.22260   |          |              |
|                   |           | 110 ->112 | 0.27381   |          |              |
| Excited State 4:  | Singlet-A | 3.6365 eV | 340.94 nm | f=0.2581 | <S**2>=0.000 |
|                   |           | 109 ->111 | -0.19047  |          |              |
|                   |           | 109 ->112 | 0.59655   |          |              |
|                   |           | 110 ->113 | 0.30221   |          |              |
| Excited State 5:  | Singlet-A | 3.7336 eV | 332.08 nm | f=0.1596 | <S**2>=0.000 |
|                   |           | 109 ->111 | 0.12601   |          |              |
|                   |           | 109 ->112 | -0.29031  |          |              |
|                   |           | 109 ->113 | -0.14217  |          |              |
|                   |           | 110 ->113 | 0.60006   |          |              |
| Excited State 6:  | Singlet-A | 4.0594 eV | 305.42 nm | f=0.0272 | <S**2>=0.000 |
|                   |           | 107 ->111 | -0.11886  |          |              |
|                   |           | 107 ->112 | 0.10333   |          |              |
|                   |           | 108 ->111 | -0.25097  |          |              |
|                   |           | 108 ->112 | 0.10133   |          |              |
|                   |           | 109 ->113 | 0.59225   |          |              |
|                   |           | 110 ->113 | 0.19319   |          |              |
| Excited State 7:  | Singlet-A | 4.0893 eV | 303.19 nm | f=0.0118 | <S**2>=0.000 |
|                   |           | 107 ->111 | -0.37913  |          |              |
|                   |           | 107 ->112 | -0.12616  |          |              |
|                   |           | 108 ->111 | 0.43196   |          |              |
|                   |           | 108 ->112 | 0.15045   |          |              |
|                   |           | 110 ->114 | 0.33212   |          |              |
| Excited State 8:  | Singlet-A | 4.2893 eV | 289.05 nm | f=0.0787 | <S**2>=0.000 |
|                   |           | 107 ->111 | 0.20125   |          |              |
|                   |           | 108 ->111 | 0.46235   |          |              |
|                   |           | 109 ->113 | 0.22319   |          |              |
|                   |           | 110 ->114 | -0.40788  |          |              |
| Excited State 9:  | Singlet-A | 4.4064 eV | 281.37 nm | f=0.0643 | <S**2>=0.000 |
|                   |           | 107 ->111 | 0.51700   |          |              |
|                   |           | 109 ->113 | 0.10946   |          |              |
|                   |           | 110 ->114 | 0.42094   |          |              |
| Excited State 10: | Singlet-A | 4.4980 eV | 275.64 nm | f=0.0617 | <S**2>=0.000 |
|                   |           | 108 ->112 | 0.65434   |          |              |
|                   |           | 109 ->113 | -0.15040  |          |              |
| Excited State 11: | Singlet-A | 4.6091 eV | 269.00 nm | f=0.0004 | <S**2>=0.000 |
|                   |           | 105 ->111 | 0.57057   |          |              |
|                   |           | 105 ->112 | -0.37659  |          |              |
| Excited State 12: | Singlet-A | 4.6305 eV | 267.76 nm | f=0.1150 | <S**2>=0.000 |
|                   |           | 107 ->111 | -0.12069  |          |              |
|                   |           | 107 ->112 | 0.65544   |          |              |

|                   |           |           |           |          |              |
|-------------------|-----------|-----------|-----------|----------|--------------|
|                   |           | 109 ->113 | -0.10713  |          |              |
|                   |           | 110 ->114 | 0.10348   |          |              |
| Excited State 13: | Singlet-A | 4.7459 eV | 261.25 nm | f=0.0167 | <S**2>=0.000 |
|                   |           | 110 ->115 | 0.55740   |          |              |
|                   |           | 110 ->116 | 0.34334   |          |              |
|                   |           | 110 ->117 | 0.16316   |          |              |
|                   |           | 110 ->118 | 0.11489   |          |              |
| Excited State 14: | Singlet-A | 4.8314 eV | 256.62 nm | f=0.0367 | <S**2>=0.000 |
|                   |           | 107 ->113 | 0.11523   |          |              |
|                   |           | 108 ->113 | 0.13886   |          |              |
|                   |           | 109 ->115 | 0.13746   |          |              |
|                   |           | 109 ->116 | -0.10647  |          |              |
|                   |           | 110 ->115 | -0.34197  |          |              |
|                   |           | 110 ->116 | 0.50094   |          |              |
|                   |           | 110 ->117 | 0.18859   |          |              |
| Excited State 15: | Singlet-A | 4.8430 eV | 256.01 nm | f=0.0034 | <S**2>=0.000 |
|                   |           | 104 ->111 | 0.53853   |          |              |
|                   |           | 104 ->112 | 0.32439   |          |              |
|                   |           | 104 ->113 | -0.14132  |          |              |
|                   |           | 106 ->111 | 0.20195   |          |              |
| Excited State 16: | Singlet-A | 4.9228 eV | 251.86 nm | f=0.1442 | <S**2>=0.000 |
|                   |           | 106 ->111 | 0.11497   |          |              |
|                   |           | 108 ->113 | -0.12714  |          |              |
|                   |           | 110 ->116 | -0.22092  |          |              |
|                   |           | 110 ->117 | 0.60734   |          |              |
| Excited State 17: | Singlet-A | 4.9826 eV | 248.83 nm | f=0.0119 | <S**2>=0.000 |
|                   |           | 109 ->114 | 0.15247   |          |              |
|                   |           | 109 ->116 | 0.11492   |          |              |
|                   |           | 110 ->118 | 0.62705   |          |              |
|                   |           | 110 ->120 | 0.11290   |          |              |
| Excited State 18: | Singlet-A | 5.0062 eV | 247.66 nm | f=0.0010 | <S**2>=0.000 |
|                   |           | 106 ->111 | 0.19133   |          |              |
|                   |           | 109 ->114 | 0.63399   |          |              |
|                   |           | 110 ->118 | -0.12571  |          |              |
| Excited State 19: | Singlet-A | 5.0462 eV | 245.70 nm | f=0.0689 | <S**2>=0.000 |
|                   |           | 103 ->111 | 0.26245   |          |              |
|                   |           | 106 ->111 | -0.37355  |          |              |
|                   |           | 108 ->113 | 0.37938   |          |              |
|                   |           | 109 ->114 | 0.21346   |          |              |
|                   |           | 110 ->116 | -0.11629  |          |              |
|                   |           | 110 ->117 | 0.13217   |          |              |
| Excited State 20: | Singlet-A | 5.1038 eV | 242.93 nm | f=0.0258 | <S**2>=0.000 |
|                   |           | 102 ->111 | 0.10510   |          |              |

103 ->111 0.52201  
 105 ->112 -0.10536  
 108 ->113 -0.31813  
 109 ->115 -0.12730  
 109 ->116 0.12885  
 110 ->116 0.12105

SavETr: write IOETrn= 770 NScale= 10 NData= 16 NLR=1 LETran= 370.

Standard orientation:

| -----  |        |        |                         |           |           |  |
|--------|--------|--------|-------------------------|-----------|-----------|--|
| Center | Atomic | Atomic | Coordinates (Angstroms) |           |           |  |
| Number | Number | Type   | X                       | Y         | Z         |  |
| -----  |        |        |                         |           |           |  |
| 1      | 6      | 0      | 4.713993                | -0.266004 | -0.108189 |  |
| 2      | 6      | 0      | 3.643156                | 0.555039  | 0.345878  |  |
| 3      | 6      | 0      | 2.351388                | 0.085758  | 0.310142  |  |
| 4      | 6      | 0      | 2.005743                | -1.204021 | -0.168585 |  |
| 5      | 6      | 0      | 3.087034                | -2.016732 | -0.617565 |  |
| 6      | 6      | 0      | 4.385604                | -1.575014 | -0.589771 |  |
| 7      | 1      | 0      | 3.812320                | 1.545085  | 0.741805  |  |
| 8      | 1      | 0      | 2.867446                | -3.008204 | -0.996329 |  |
| 9      | 1      | 0      | 5.162049                | -2.229278 | -0.957170 |  |
| 10     | 6      | 0      | 0.654532                | -1.582992 | -0.189927 |  |
| 11     | 6      | 0      | -0.368421               | -0.705257 | 0.250444  |  |
| 12     | 6      | 0      | 0.025970                | 0.571237  | 0.837500  |  |
| 13     | 8      | 0      | 1.370600                | 0.920278  | 0.781920  |  |
| 14     | 1      | 0      | 0.373117                | -2.555581 | -0.567012 |  |
| 15     | 6      | 0      | -2.992746               | -0.424924 | 0.171754  |  |
| 16     | 6      | 0      | -3.268043               | -2.670565 | 0.093500  |  |
| 17     | 7      | 0      | -1.960009               | -2.497881 | 0.116732  |  |
| 18     | 6      | 0      | -1.730889               | -1.145132 | 0.221194  |  |
| 19     | 7      | 0      | -3.954642               | -1.444656 | 0.143841  |  |
| 20     | 6      | 0      | -4.015955               | -3.872116 | 0.052720  |  |
| 21     | 6      | 0      | -5.383133               | -3.814199 | 0.101841  |  |
| 22     | 1      | 0      | -5.968037               | -4.725269 | 0.072932  |  |
| 23     | 6      | 0      | -6.045115               | -2.559595 | 0.213696  |  |
| 24     | 1      | 0      | -7.122252               | -2.507123 | 0.292854  |  |
| 25     | 6      | 0      | -5.325437               | -1.400235 | 0.238454  |  |
| 26     | 1      | 0      | -5.779907               | -0.433122 | 0.366745  |  |
| 27     | 1      | 0      | -3.476858               | -4.808276 | -0.006437 |  |
| 28     | 7      | 0      | 6.002679                | 0.181332  | -0.087665 |  |
| 29     | 6      | 0      | 7.136585                | -0.677869 | -0.452473 |  |
| 30     | 1      | 0      | 7.996061                | -0.326455 | 0.121553  |  |
| 31     | 1      | 0      | 6.939603                | -1.696852 | -0.118651 |  |
| 32     | 6      | 0      | 7.466297                | -0.645916 | -1.949730 |  |
| 33     | 1      | 0      | 6.631378                | -1.013691 | -2.549551 |  |
| 34     | 1      | 0      | 7.704622                | 0.368503  | -2.277595 |  |
| 35     | 1      | 0      | 8.335516                | -1.279464 | -2.143586 |  |

|    |   |   |           |          |           |
|----|---|---|-----------|----------|-----------|
| 36 | 6 | 0 | 6.346821  | 1.554845 | 0.301387  |
| 37 | 1 | 0 | 7.260130  | 1.816524 | -0.236335 |
| 38 | 1 | 0 | 5.572930  | 2.235022 | -0.056039 |
| 39 | 6 | 0 | 6.568402  | 1.721886 | 1.809766  |
| 40 | 1 | 0 | 6.850409  | 2.756126 | 2.022559  |
| 41 | 1 | 0 | 5.663605  | 1.488777 | 2.374563  |
| 42 | 1 | 0 | 7.371326  | 1.070511 | 2.162289  |
| 43 | 8 | 0 | -0.685733 | 1.372034 | 1.409415  |
| 44 | 6 | 0 | -3.245467 | 0.950118 | -0.027541 |
| 45 | 6 | 0 | -4.395621 | 1.590280 | -0.441195 |
| 46 | 6 | 0 | -4.490019 | 3.022298 | -0.631611 |
| 47 | 8 | 0 | -5.485973 | 3.600179 | -1.068191 |
| 48 | 8 | 0 | -3.364322 | 3.706266 | -0.282071 |
| 49 | 6 | 0 | -3.396813 | 5.131605 | -0.458869 |
| 50 | 1 | 0 | -2.424385 | 5.488517 | -0.125978 |
| 51 | 1 | 0 | -3.553093 | 5.388442 | -1.507943 |
| 52 | 1 | 0 | -4.188624 | 5.578581 | 0.144406  |
| 53 | 1 | 0 | -5.302010 | 1.071603 | -0.716091 |
| 54 | 1 | 0 | -2.385304 | 1.579054 | 0.143149  |

-----  
Rotational constants (GHZ): 0.2250089 0.0635153 0.0517698

Excitation energies and oscillator strengths:

Excited State 1: Singlet-A 2.4729 eV 501.37 nm f=1.4063 <S\*\*2>=0.000  
110 ->111 0.70410

This state for optimization and/or second-order correction.

Total Energy, E(TD-HF/TD-KS) = -1393.86578184

Copying the excited state density for this state as the 1-particle RhoCI density.

Excited State 2: Singlet-A 2.9807 eV 415.95 nm f=0.0278 <S\*\*2>=0.000  
109 ->111 -0.38970  
110 ->112 0.58164

Excited State 3: Singlet-A 3.1268 eV 396.52 nm f=0.5942 <S\*\*2>=0.000  
109 ->111 0.57982  
110 ->112 0.39249

Excited State 4: Singlet-A 3.5456 eV 349.68 nm f=0.1535 <S\*\*2>=0.000  
109 ->112 0.67461  
110 ->113 0.18019

Excited State 5: Singlet-A 3.6383 eV 340.77 nm f=0.1601 <S\*\*2>=0.000  
108 ->111 0.15513  
109 ->112 -0.18544  
109 ->113 -0.10925  
110 ->113 0.64474

Excited State 6: Singlet-A 3.8330 eV 323.46 nm f=0.0202 <S\*\*2>=0.000  
107 ->111 -0.28106  
108 ->111 0.61067  
110 ->113 -0.15208

Excited State 7: Singlet-A 3.9491 eV 313.96 nm f=0.0055 <S\*\*2>=0.000  
107 ->111 -0.57770  
108 ->111 -0.27240  
109 ->113 0.11986  
110 ->114 0.23122

Excited State 8: Singlet-A 4.1748 eV 296.99 nm f=0.0946 <S\*\*2>=0.000  
107 ->111 0.11625  
108 ->111 0.10505  
108 ->112 0.19060  
109 ->113 0.63896  
110 ->113 0.11851

Excited State 9: Singlet-A 4.2408 eV 292.36 nm f=0.0504 <S\*\*2>=0.000  
107 ->111 0.24295  
110 ->114 0.64251

Excited State 10: Singlet-A 4.3444 eV 285.39 nm f=0.1182 <S\*\*2>=0.000  
108 ->112 0.65649  
109 ->113 -0.20745

Excited State 11: Singlet-A 4.3951 eV 282.10 nm f=0.0005 <S\*\*2>=0.000  
106 ->111 0.60940  
106 ->112 -0.31908

Excited State 12: Singlet-A 4.6496 eV 266.66 nm f=0.0601 <S\*\*2>=0.000  
104 ->111 -0.33284  
105 ->111 0.20514  
107 ->112 0.55126

Excited State 13: Singlet-A 4.6538 eV 266.41 nm f=0.0148 <S\*\*2>=0.000  
104 ->111 0.52661  
104 ->112 0.11578  
105 ->111 -0.15754  
107 ->112 0.37080

Excited State 14: Singlet-A 4.6843 eV 264.68 nm f=0.0193 <S\*\*2>=0.000  
110 ->115 0.59434  
110 ->116 0.32475  
110 ->120 -0.10968

Excited State 15: Singlet-A 4.7652 eV 260.19 nm f=0.0916 <S\*\*2>=0.000  
103 ->111 0.29423  
105 ->111 -0.16267  
110 ->115 0.27893  
110 ->116 -0.49363  
110 ->117 0.13131

Excited State 16: Singlet-A 4.7850 eV 259.11 nm f=0.0338 <S\*\*2>=0.000  
102 ->111 0.20198  
103 ->111 -0.43573  
105 ->111 0.30085  
108 ->113 0.16271  
110 ->115 0.14633  
110 ->116 -0.24506  
110 ->117 0.12624

Excited State 17: Singlet-A 4.7943 eV 258.61 nm f=0.1174 <S\*\*2>=0.000  
105 ->111 -0.10980  
109 ->116 0.11696  
110 ->115 -0.11059  
110 ->116 0.18938  
110 ->117 0.61623

Excited State 18: Singlet-A 4.8750 eV 254.33 nm f=0.0104 <S\*\*2>=0.000  
109 ->115 0.11524  
110 ->117 0.10043  
110 ->118 0.66326

Excited State 19: Singlet-A 4.8886 eV 253.62 nm f=0.0048 <S\*\*2>=0.000  
102 ->111 -0.13481  
103 ->111 0.33989  
104 ->111 0.21791  
105 ->111 0.48057  
108 ->113 0.19753

Excited State 20: Singlet-A 4.9787 eV 249.03 nm f=0.0445 <S\*\*2>=0.000  
108 ->113 0.28155  
109 ->114 0.61597  
110 ->114 -0.10530

**9.- Equilibrium Geometry in Ground State, Equilibrium Geometry in Excited states, Excitation energies and oscillator strength of compound 7a' (B3LYP)**

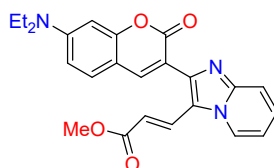

**7a'**

B3LYP

Standard orientation:

| Center Number | Atomic Number | Atomic Type | Coordinates (Angstroms) |           |           |
|---------------|---------------|-------------|-------------------------|-----------|-----------|
|               |               |             | X                       | Y         | Z         |
| 1             | 6             | 0           | -4.347400               | -0.159664 | -0.317349 |
| 2             | 6             | 0           | -3.529237               | -0.946293 | 0.530643  |
| 3             | 6             | 0           | -2.161164               | -0.973037 | 0.340286  |
| 4             | 6             | 0           | -1.513834               | -0.239777 | -0.671300 |
| 5             | 6             | 0           | -2.333920               | 0.539650  | -1.515930 |
| 6             | 6             | 0           | -3.697819               | 0.583632  | -1.354030 |
| 7             | 1             | 0           | -3.938027               | -1.523668 | 1.346030  |
| 8             | 1             | 0           | -1.871852               | 1.109836  | -2.314460 |
| 9             | 1             | 0           | -4.280309               | 1.180685  | -2.039542 |
| 10            | 6             | 0           | -0.104699               | -0.349562 | -0.777760 |
| 11            | 6             | 0           | 0.632032                | -1.132807 | 0.072036  |
| 12            | 6             | 0           | -0.040832               | -1.870347 | 1.131860  |
| 13            | 8             | 0           | -1.424954               | -1.752366 | 1.193825  |
| 14            | 1             | 0           | 0.396908                | 0.192422  | -1.572786 |
| 15            | 6             | 0           | 3.019715                | -0.193440 | -0.065759 |
| 16            | 6             | 0           | 4.006622                | -2.190575 | -0.341782 |
| 17            | 7             | 0           | 2.700369                | -2.452998 | -0.220668 |
| 18            | 6             | 0           | 2.094595                | -1.256780 | -0.052922 |
| 19            | 7             | 0           | 4.257874                | -0.815648 | -0.260347 |
| 20            | 6             | 0           | 5.083095                | -3.077763 | -0.526603 |
| 21            | 6             | 0           | 6.360152                | -2.577717 | -0.606295 |
| 22            | 1             | 0           | 7.199881                | -3.246461 | -0.747586 |
| 23            | 6             | 0           | 6.585020                | -1.183241 | -0.494855 |
| 24            | 1             | 0           | 7.586971                | -0.778848 | -0.542235 |
| 25            | 6             | 0           | 5.538313                | -0.322035 | -0.322264 |
| 26            | 1             | 0           | 5.668374                | 0.740937  | -0.219275 |
| 27            | 1             | 0           | 4.870347                | -4.136437 | -0.593693 |
| 28            | 7             | 0           | -5.702516               | -0.114019 | -0.155769 |
| 29            | 6             | 0           | -6.557784               | 0.770380  | -0.957319 |
| 30            | 1             | 0           | -7.418524               | 1.029869  | -0.337036 |
| 31            | 1             | 0           | -6.033521               | 1.708166  | -1.148014 |
| 32            | 6             | 0           | -7.037090               | 0.140770  | -2.268730 |
| 33            | 1             | 0           | -6.198245               | -0.105586 | -2.923663 |
| 34            | 1             | 0           | -7.601195               | -0.775943 | -2.078872 |



|    |   |   |           |           |           |
|----|---|---|-----------|-----------|-----------|
| 35 | 1 | 0 | -7.691772 | 0.837716  | -2.799062 |
| 36 | 6 | 0 | -6.393532 | -0.946387 | 0.836337  |
| 37 | 1 | 0 | -7.396241 | -1.140541 | 0.449610  |
| 38 | 1 | 0 | -5.901950 | -1.919086 | 0.897207  |
| 39 | 6 | 0 | -6.490399 | -0.299986 | 2.221862  |
| 40 | 1 | 0 | -7.035209 | -0.959067 | 2.903229  |
| 41 | 1 | 0 | -5.501533 | -0.112809 | 2.646120  |
| 42 | 1 | 0 | -7.024931 | 0.652079  | 2.171648  |
| 43 | 8 | 0 | 0.474071  | -2.565748 | 1.983340  |
| 44 | 6 | 0 | 2.734549  | 1.191380  | 0.126810  |
| 45 | 6 | 0 | 3.508632  | 2.292985  | -0.026646 |
| 46 | 6 | 0 | 3.030015  | 3.653513  | 0.230913  |
| 47 | 8 | 0 | 3.710285  | 4.651667  | 0.047910  |
| 48 | 8 | 0 | 1.762135  | 3.714195  | 0.691987  |
| 49 | 6 | 0 | 1.232200  | 5.028181  | 0.956508  |
| 50 | 1 | 0 | 0.221518  | 4.863695  | 1.322206  |
| 51 | 1 | 0 | 1.831697  | 5.536251  | 1.712461  |
| 52 | 1 | 0 | 1.213346  | 5.623416  | 0.042951  |
| 53 | 1 | 0 | 4.527412  | 2.269209  | -0.382975 |
| 54 | 1 | 0 | 1.711075  | 1.364359  | 0.442470  |

-----  
Rotational constants (GHZ): 0.2194130 0.0680333 0.0566899

Excitation energies and oscillator strengths:

Excited State 1: Singlet-A 2.9950 eV 413.97 nm f=0.2820 <S\*\*2>=0.000  
110 ->111 0.69613

This state for optimization and/or second-order correction.

Total Energy, E(TD-HF/TD-KS) = -1393.85193139

Copying the excited state density for this state as the 1-particle RhoCI density.

Excited State 2: Singlet-A 3.1782 eV 390.10 nm f=0.4993 <S\*\*2>=0.000  
109 ->111 -0.19910  
110 ->112 0.66022

Excited State 3: Singlet-A 3.4726 eV 357.03 nm f=0.1361 <S\*\*2>=0.000  
109 ->111 0.42083  
109 ->112 0.52434  
110 ->112 0.19119

Excited State 4: Singlet-A 3.6092 eV 343.52 nm f=0.5724 <S\*\*2>=0.000  
109 ->111 0.50476  
109 ->112 -0.45108  
110 ->113 0.13116

Excited State 5: Singlet-A 3.7604 eV 329.71 nm f=0.0423 <S\*\*2>=0.000  
109 ->111 -0.10785  
109 ->113 -0.12787  
110 ->113 0.66700

Excited State 6: Singlet-A 4.0234 eV 308.16 nm f=0.0057 <S\*\*2>=0.000

|                   |           |           |                                 |
|-------------------|-----------|-----------|---------------------------------|
|                   |           | 107 ->111 | -0.19320                        |
|                   |           | 108 ->111 | -0.16929                        |
|                   |           | 109 ->113 | 0.61336                         |
|                   |           | 110 ->113 | 0.16770                         |
| Excited State 7:  | Singlet-A | 4.1442 eV | 299.18 nm f=0.0106 <S**2>=0.000 |
|                   |           | 107 ->111 | 0.20256                         |
|                   |           | 107 ->112 | 0.19286                         |
|                   |           | 108 ->111 | -0.37194                        |
|                   |           | 108 ->112 | -0.31203                        |
|                   |           | 110 ->114 | 0.41411                         |
| Excited State 8:  | Singlet-A | 4.3475 eV | 285.19 nm f=0.1022 <S**2>=0.000 |
|                   |           | 107 ->112 | 0.10873                         |
|                   |           | 108 ->111 | 0.49380                         |
|                   |           | 108 ->112 | 0.11238                         |
|                   |           | 109 ->113 | 0.14275                         |
|                   |           | 110 ->114 | 0.43550                         |
| Excited State 9:  | Singlet-A | 4.4429 eV | 279.06 nm f=0.0574 <S**2>=0.000 |
|                   |           | 107 ->111 | 0.21393                         |
|                   |           | 108 ->111 | -0.24655                        |
|                   |           | 108 ->112 | 0.59170                         |
| Excited State 10: | Singlet-A | 4.4747 eV | 277.08 nm f=0.0484 <S**2>=0.000 |
|                   |           | 107 ->111 | 0.53900                         |
|                   |           | 107 ->112 | 0.18465                         |
|                   |           | 108 ->111 | 0.10108                         |
|                   |           | 108 ->112 | -0.10333                        |
|                   |           | 109 ->113 | 0.17417                         |
|                   |           | 110 ->114 | -0.30443                        |
|                   |           | 110 ->117 | 0.10451                         |
| Excited State 11: | Singlet-A | 4.5513 eV | 272.42 nm f=0.1594 <S**2>=0.000 |
|                   |           | 107 ->111 | -0.23459                        |
|                   |           | 107 ->112 | 0.61583                         |
|                   |           | 109 ->113 | -0.15995                        |
|                   |           | 110 ->114 | -0.11604                        |
| Excited State 12: | Singlet-A | 4.6202 eV | 268.35 nm f=0.0028 <S**2>=0.000 |
|                   |           | 104 ->111 | 0.22478                         |
|                   |           | 104 ->112 | -0.11786                        |
|                   |           | 105 ->111 | 0.54268                         |
|                   |           | 105 ->112 | -0.22100                        |
|                   |           | 106 ->111 | 0.23685                         |
| Excited State 13: | Singlet-A | 4.7560 eV | 260.69 nm f=0.0127 <S**2>=0.000 |
|                   |           | 110 ->115 | 0.66669                         |
|                   |           | 110 ->118 | -0.18060                        |
| Excited State 14: | Singlet-A | 4.8105 eV | 257.73 nm f=0.0009 <S**2>=0.000 |

|                   |           |                                           |
|-------------------|-----------|-------------------------------------------|
|                   | 103 ->112 | -0.14543                                  |
|                   | 104 ->111 | 0.32837                                   |
|                   | 104 ->112 | 0.44689                                   |
|                   | 104 ->113 | 0.10354                                   |
|                   | 105 ->111 | -0.10247                                  |
|                   | 105 ->112 | -0.22584                                  |
|                   | 106 ->111 | -0.15272                                  |
|                   | 106 ->112 | -0.20121                                  |
| Excited State 15: | Singlet-A | 4.8892 eV 253.59 nm f=0.0916 <S**2>=0.000 |
|                   | 107 ->113 | 0.10515                                   |
|                   | 109 ->116 | -0.17417                                  |
|                   | 110 ->116 | 0.49895                                   |
|                   | 110 ->117 | 0.38688                                   |
| Excited State 16: | Singlet-A | 4.9208 eV 251.96 nm f=0.1131 <S**2>=0.000 |
|                   | 106 ->111 | -0.11079                                  |
|                   | 107 ->113 | -0.15308                                  |
|                   | 108 ->113 | -0.15535                                  |
|                   | 109 ->116 | 0.10652                                   |
|                   | 110 ->116 | -0.35744                                  |
|                   | 110 ->117 | 0.52082                                   |
| Excited State 17: | Singlet-A | 5.0094 eV 247.50 nm f=0.0195 <S**2>=0.000 |
|                   | 103 ->111 | 0.12488                                   |
|                   | 104 ->111 | 0.15977                                   |
|                   | 104 ->112 | -0.13548                                  |
|                   | 106 ->111 | -0.26616                                  |
|                   | 109 ->114 | 0.41973                                   |
|                   | 110 ->118 | 0.34843                                   |
|                   | 110 ->119 | -0.11605                                  |
| Excited State 18: | Singlet-A | 5.0178 eV 247.09 nm f=0.0043 <S**2>=0.000 |
|                   | 103 ->111 | -0.10262                                  |
|                   | 104 ->111 | -0.13601                                  |
|                   | 104 ->112 | 0.10841                                   |
|                   | 106 ->111 | 0.20059                                   |
|                   | 109 ->114 | -0.23841                                  |
|                   | 110 ->115 | 0.12904                                   |
|                   | 110 ->118 | 0.51445                                   |
|                   | 110 ->119 | -0.16507                                  |
| Excited State 19: | Singlet-A | 5.0303 eV 246.47 nm f=0.0294 <S**2>=0.000 |
|                   | 103 ->111 | -0.17060                                  |
|                   | 104 ->111 | -0.24862                                  |
|                   | 104 ->112 | 0.17739                                   |
|                   | 106 ->111 | 0.28835                                   |
|                   | 106 ->112 | -0.11252                                  |
|                   | 109 ->114 | 0.49822                                   |
| Excited State 20: | Singlet-A | 5.0586 eV 245.10 nm f=0.0589 <S**2>=0.000 |

|           |          |
|-----------|----------|
| 104 ->111 | 0.11749  |
| 107 ->113 | 0.24178  |
| 108 ->113 | 0.46712  |
| 109 ->116 | -0.28401 |
| 110 ->116 | -0.27497 |

SavETr: write IOETrn= 770 NScale= 10 NData= 16 NLR=1 LETran= 370.

\*\*\*\*\*

Excited State 5: Singlet-A 3.9152 eV 316.68 nm f=0.1530 <S\*\*2>=0.000

|           |          |
|-----------|----------|
| 99 ->104  | 0.10166  |
| 100 ->103 | 0.15302  |
| 100 ->104 | -0.31073 |
| 101 ->104 | -0.14061 |
| 102 ->105 | 0.57426  |

Excited State 6: Singlet-A 4.0080 eV 309.34 nm f=0.0497 <S\*\*2>=0.000

|           |         |
|-----------|---------|
| 101 ->103 | 0.10329 |
| 101 ->104 | 0.67847 |
| 102 ->105 | 0.10456 |

Excited State 7: Singlet-A 4.1436 eV 299.22 nm f=0.0124 <S\*\*2>=0.000

|           |         |
|-----------|---------|
| 99 ->103  | 0.20258 |
| 100 ->104 | 0.59085 |
| 102 ->105 | 0.30570 |

Excited State 8: Singlet-A 4.4361 eV 279.49 nm f=0.0085 <S\*\*2>=0.000

|           |          |
|-----------|----------|
| 99 ->103  | 0.62904  |
| 99 ->104  | -0.11501 |
| 100 ->104 | -0.12300 |
| 101 ->105 | -0.11804 |
| 101 ->106 | 0.12855  |
| 102 ->105 | -0.14001 |

Excited State 9: Singlet-A 4.5620 eV 271.77 nm f=0.0002 <S\*\*2>=0.000

|          |         |
|----------|---------|
| 98 ->103 | 0.49825 |
| 98 ->104 | 0.47510 |

Excited State 10: Singlet-A 4.6563 eV 266.27 nm f=0.0521 <S\*\*2>=0.000

|           |         |
|-----------|---------|
| 99 ->103  | 0.10040 |
| 101 ->105 | 0.67740 |

Excited State 11: Singlet-A 4.7110 eV 263.18 nm f=0.0035 <S\*\*2>=0.000

|          |          |
|----------|----------|
| 95 ->103 | 0.17882  |
| 96 ->103 | 0.21550  |
| 97 ->103 | 0.58154  |
| 97 ->104 | -0.16276 |

Excited State 12: Singlet-A 4.7660 eV 260.14 nm f=0.1354 <S\*\*2>=0.000  
100 ->105 0.64899  
102 ->107 -0.14278  
102 ->108 0.11278

Excited State 13: Singlet-A 4.8196 eV 257.25 nm f=0.1297 <S\*\*2>=0.000  
99 ->104 0.47650  
102 ->106 0.48526

Excited State 14: Singlet-A 4.9004 eV 253.01 nm f=0.1685 <S\*\*2>=0.000  
99 ->103 0.11082  
99 ->104 0.47126  
102 ->106 -0.45767

Excited State 15: Singlet-A 4.9611 eV 249.91 nm f=0.0112 <S\*\*2>=0.000  
95 ->103 -0.13543  
96 ->103 0.58885  
97 ->103 -0.16551  
98 ->103 -0.19250  
98 ->104 0.19847

Excited State 16: Singlet-A 5.1227 eV 242.03 nm f=0.1911 <S\*\*2>=0.000  
99 ->105 -0.19596  
100 ->106 0.16453  
101 ->106 0.43981  
102 ->106 -0.15034  
102 ->107 -0.17720  
102 ->108 0.32570  
102 ->109 -0.11755

Excited State 17: Singlet-A 5.1565 eV 240.44 nm f=0.0059 <S\*\*2>=0.000  
96 ->103 -0.20335  
97 ->103 0.13046  
98 ->103 -0.40341  
98 ->104 0.41062  
101 ->106 0.14177  
102 ->107 0.21832

Excited State 18: Singlet-A 5.1661 eV 240.00 nm f=0.0103 <S\*\*2>=0.000  
96 ->103 0.11561  
98 ->103 0.19612  
98 ->104 -0.19269  
99 ->105 0.19858  
100 ->105 0.13526  
101 ->106 0.21207  
102 ->107 0.48329

Excited State 19: Singlet-A 5.2275 eV 237.18 nm f=0.0046 <S\*\*2>=0.000  
99 ->105 -0.11432  
101 ->106 -0.15409  
102 ->108 0.41337

|                   |           |           |           |          |              |
|-------------------|-----------|-----------|-----------|----------|--------------|
|                   | 102 ->109 | 0.37135   |           |          |              |
|                   | 102 ->110 | 0.31802   |           |          |              |
| Excited State 20: | Singlet-A | 5.3686 eV | 230.95 nm | f=0.0632 | <S**2>=0.000 |
|                   | 96 ->104  | -0.12113  |           |          |              |
|                   | 97 ->104  | 0.29231   |           |          |              |
|                   | 101 ->106 | 0.14406   |           |          |              |
|                   | 102 ->107 | -0.27284  |           |          |              |
|                   | 102 ->108 | -0.25432  |           |          |              |
|                   | 102 ->109 | 0.41206   |           |          |              |
|                   | 102 ->110 | 0.14264   |           |          |              |

SavETr: write IOETrn= 770 NScale= 10 NData= 16 NLR=1 LETran= 370.

## 10. Benchmark of both vertical excitation and emission energy

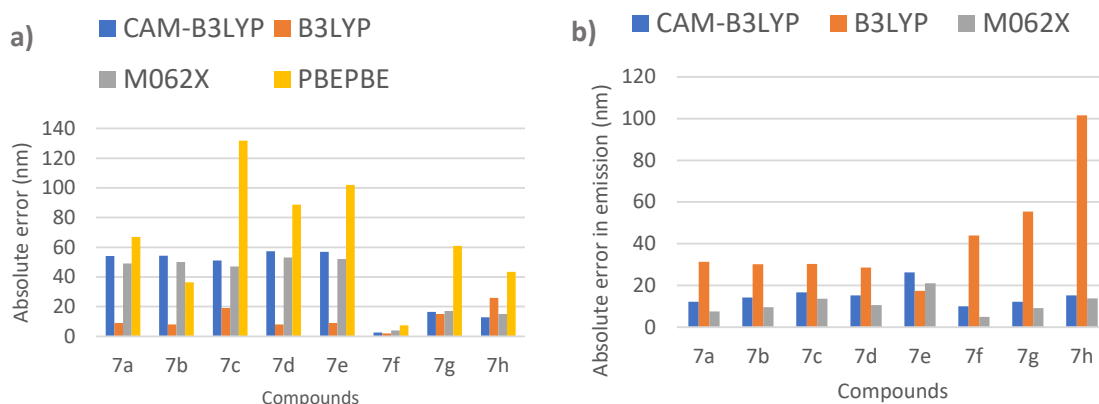

**Figure SI-133.** Absolute error in nm between the experimental data and theoretical data of compounds **7a-h**. a) absorption. b) emission.

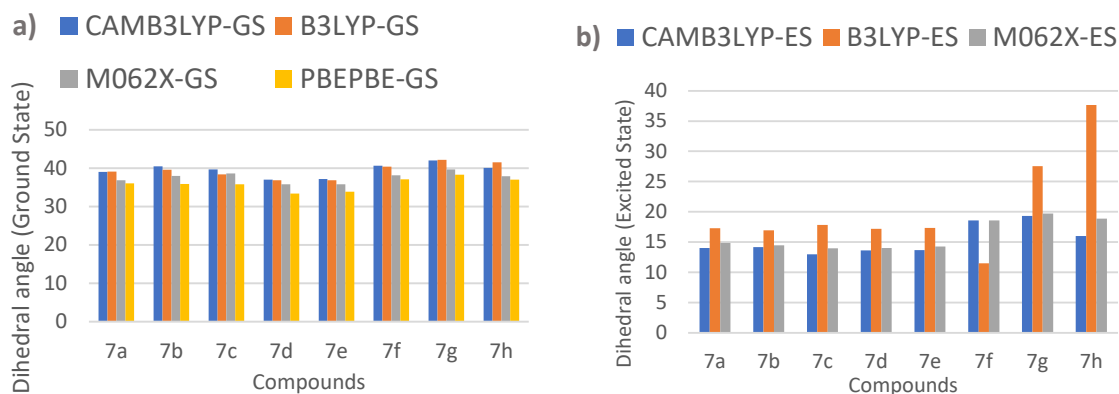

**Figure SI-134.** Dihedral angles of compound **7a-h**. a) Ground State and b) Excited State.

*Theoretical linear and non-linear properties analysis.*

The total static dipole moment  $\mu$  was determined by the squad of the quadratic sum of the components of the dipole moment. (Ec. 1)

$$\mu = \sqrt{\mu_x^2 + \mu_y^2 + \mu_z^2} \quad (1).$$

The isotropic polarizability  $\alpha$  was be calculated from the trace of the polarization tensor (Ec. 2)

$$\alpha = (\alpha_{xx} + \alpha_{yy} + \alpha_{zz}) \quad (2).$$

The mean/static first hyperpolarizability  $\beta_0$  is expressed by (Ec. 3 and Ec. 4):

$$\beta_0 = (\beta_x^2 + \beta_y^2 + \beta_z^2) \quad (3).$$

$$\beta_0 = [(\beta_{xxx} + \beta_{xyy} + \beta_{xzz})^2 + (\beta_{yxx} + \beta_{yyy} + \beta_{yzz})^2 + (\beta_{zxx} + \beta_{zyy} + \beta_{zzz})^2] \quad (4).$$

$\beta_x, \beta_y, \beta_z$  are the components of the second order polarizability tensor along the x, y and z axes.

The mean second hyperpolarizability  $\gamma$  is expressed by (Ec. 5):

$$\gamma = \frac{1}{5}[(\gamma_{xxxx} + \gamma_{yyyy} + \gamma_{zzzz}) + 2(\gamma_{xxyy} + \gamma_{yyzz} + \gamma_{zzxx})] \quad (5)$$

Where,  $\gamma_{xxxx} + \gamma_{yyyy} + \gamma_{zzzz}$  are the second order tensor components.

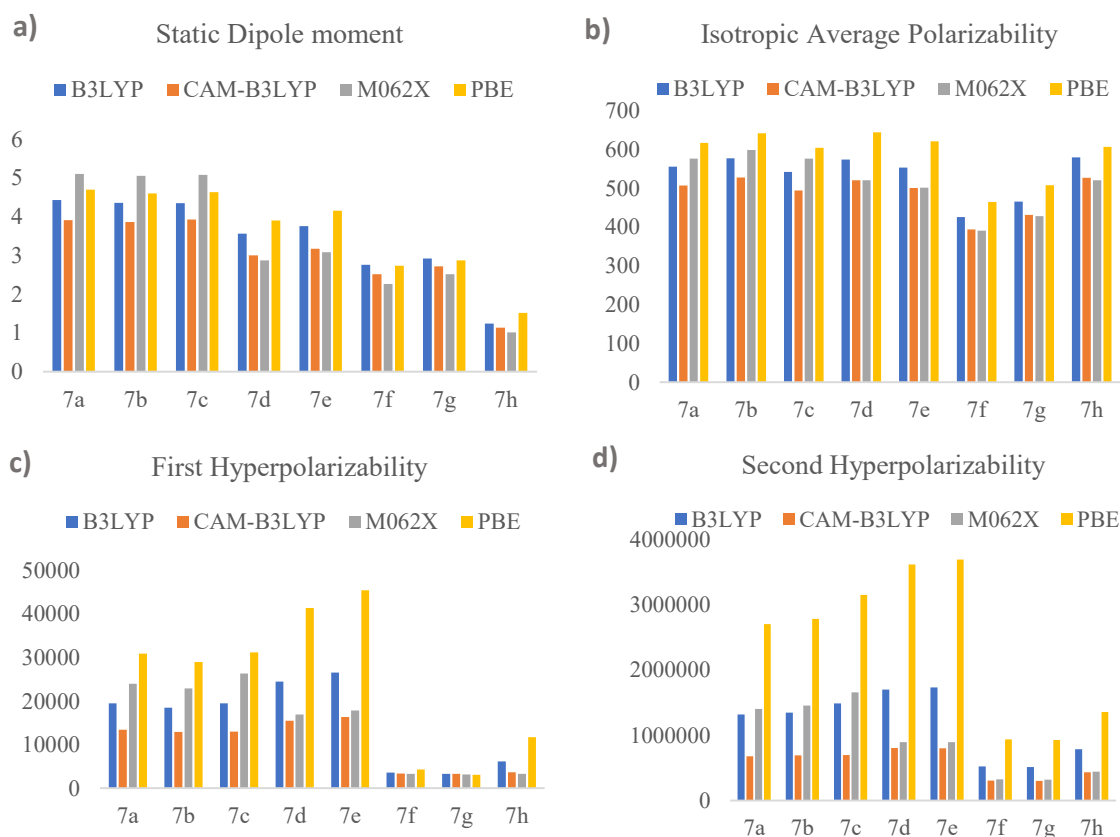

**Figure SI-135.** Theoretical calculations of the nonlinear properties of compounds **7a-h**. a) static dipole moment, b) isotropic average polarizability, c) first hyperpolarizability, d) second hyperpolarizability.

## 11. Static dipole moment, isotropic average polarizability, first hyperpolarizability and second hyperpolarizability of compound **7a-h**

| Molecule | Method | $\mu^{[a]}$ | $\alpha_0^{[b]}$ | $\beta_0^{[c]}$ | $\gamma_0^{[d]}$ |
|----------|--------|-------------|------------------|-----------------|------------------|
|----------|--------|-------------|------------------|-----------------|------------------|

|                 |           | a.u.     | a.u.      | a.u.       | a.u.    |
|-----------------|-----------|----------|-----------|------------|---------|
| <b>7a</b>       | B3LYP     | 4.432623 | 555.63933 | 19543.4411 | 1321884 |
|                 | CAM-B3LYP | 3.914257 | 507.35733 | 13443.4485 | 680356  |
|                 | M062X     | 5.104336 | 576.77467 | 24036.2611 | 1407060 |
|                 | PBE       | 4.700977 | 616.73933 | 30914.4481 | 2710851 |
| <b>7b</b>       | B3LYP     | 4.354041 | 577.35967 | 18479.5701 | 1347974 |
|                 | CAM-B3LYP | 3.862711 | 527.47567 | 12915.161  | 690913  |
|                 | M062X     | 5.057873 | 598.66267 | 22914.8533 | 1458239 |
|                 | PBE       | 4.602749 | 642.04333 | 28973.818  | 2787777 |
| <b>7c</b>       | B3LYP     | 4.353766 | 542.43967 | 19527.8854 | 1490650 |
|                 | CAM-B3LYP | 3.926845 | 494.01667 | 13051.1336 | 696898  |
|                 | M062X     | 5.081003 | 576.205   | 26380.3665 | 1658576 |
|                 | PBE       | 4.630039 | 604.64    | 31186.907  | 3157246 |
| <b>7d</b>       | B3LYP     | 3.565883 | 573.94967 | 24516.1865 | 1703297 |
|                 | CAM-B3LYP | 3.004084 | 520.55433 | 15506.4538 | 804267  |
|                 | M062X     | 2.875138 | 520.797   | 16935.3404 | 897191  |
|                 | PBE       | 3.906009 | 644.51933 | 41423.9897 | 3622888 |
| <b>7e</b>       | B3LYP     | 3.759327 | 553.42    | 26601.8673 | 1737046 |
|                 | CAM-B3LYP | 3.17446  | 501.02    | 16338.8322 | 801496  |
|                 | M062X     | 3.079435 | 501.34867 | 17861.6618 | 897517  |
|                 | PBE       | 4.156943 | 620.923   | 45514.066  | 3697776 |
| <b>7f</b>       | B3LYP     | 2.759275 | 426.01    | 3559.797   | 524577  |
|                 | CAM-B3LYP | 2.514013 | 393.61833 | 3413.61965 | 303890  |
|                 | M062X     | 2.265561 | 390.99467 | 3323.69175 | 323841  |
|                 | PBE       | 2.733683 | 464.72633 | 4317.22768 | 939318  |
| <b>7g</b>       | B3LYP     | 2.918466 | 465.27867 | 3283.88806 | 514166  |
|                 | CAM-B3LYP | 2.714823 | 431.443   | 3289.8928  | 302766  |
|                 | M062X     | 2.513504 | 428.53033 | 3187.23534 | 318663  |
|                 | PBE       | 2.869619 | 507.986   | 3077.76374 | 928800  |
| <b>7h</b>       | B3LYP     | 1.241644 | 579.221   | 6172.80369 | 786579  |
|                 | CAM-B3LYP | 1.136127 | 526.82333 | 3654.19197 | 434853  |
|                 | M062X     | 1.011368 | 520.54533 | 3329.57635 | 444456  |
|                 | PBE       | 1.516401 | 607.08767 | 11720.1685 | 1359374 |
| <b>Coumarin</b> | B3LYP     | 4.269110 | 263.95367 | 7500.13424 | 207626  |
| <b>Imidazo</b>  | B3LYP     | 0.923603 | 240.06700 | 4884.65540 | 170203  |



## 12. Equilibrium Geometry in Ground State, Excitation energies and oscillator strength of coumarin fragment (B3LYP)

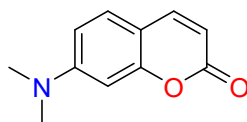

Coumarin  
B3LYP  
ABSORPTION

Excitation energies and oscillator strengths:

Excited State 1: Singlet-A 3.3739 eV 367.48 nm f=0.5454 <S\*\*2>=0.000  
58 -> 59 0.69967

This state for optimization and/or second-order correction.

Total Energy, E(TD-HF/TD-KS) = -709.706366173

Copying the excited state density for this state as the 1-particle RhoCI density.

Excited State 2: Singlet-A 4.2085 eV 294.60 nm f=0.0181 <S\*\*2>=0.000  
57 -> 59 0.41631  
58 -> 60 0.55516

Excited State 3: Singlet-A 4.4967 eV 275.72 nm f=0.0552 <S\*\*2>=0.000  
57 -> 59 0.56148  
58 -> 60 -0.41520

Excited State 4: Singlet-A 4.7538 eV 260.81 nm f=0.0133 <S\*\*2>=0.000  
58 -> 61 0.69482

Excited State 5: Singlet-A 4.8825 eV 253.93 nm f=0.0005 <S\*\*2>=0.000  
55 -> 59 0.69032  
55 -> 62 0.12182

Excited State 6: Singlet-A 4.9091 eV 252.56 nm f=0.1407 <S\*\*2>=0.000  
56 -> 59 -0.18291  
58 -> 62 0.66426

Excited State 7: Singlet-A 5.0593 eV 245.06 nm f=0.0061 <S\*\*2>=0.000  
58 -> 63 0.69700

Excited State 8: Singlet-A 5.2139 eV 237.79 nm f=0.0347 <S\*\*2>=0.000  
56 -> 59 -0.38800  
58 -> 64 0.57477

Excited State 9: Singlet-A 5.2975 eV 234.04 nm f=0.0372 <S\*\*2>=0.000  
56 -> 59 0.37490

|                   |           |           |           |          |              |
|-------------------|-----------|-----------|-----------|----------|--------------|
|                   |           | 58 -> 64  | 0.22879   |          |              |
|                   |           | 58 -> 65  | 0.52308   |          |              |
| Excited State 10: | Singlet-A | 5.3889 eV | 230.07 nm | f=0.0963 | <S**2>=0.000 |
|                   |           | 56 -> 59  | -0.36790  |          |              |
|                   |           | 58 -> 62  | -0.15460  |          |              |
|                   |           | 58 -> 64  | -0.29676  |          |              |
|                   |           | 58 -> 65  | 0.45725   |          |              |
|                   |           | 58 -> 67  | -0.10574  |          |              |
| Excited State 11: | Singlet-A | 5.4754 eV | 226.44 nm | f=0.0012 | <S**2>=0.000 |
|                   |           | 58 -> 66  | 0.68575   |          |              |
| Excited State 12: | Singlet-A | 5.6555 eV | 219.23 nm | f=0.0079 | <S**2>=0.000 |
|                   |           | 57 -> 60  | -0.10205  |          |              |
|                   |           | 58 -> 67  | 0.67129   |          |              |
| Excited State 13: | Singlet-A | 5.8526 eV | 211.84 nm | f=0.0037 | <S**2>=0.000 |
|                   |           | 58 -> 67  | -0.11033  |          |              |
|                   |           | 58 -> 68  | 0.34019   |          |              |
|                   |           | 58 -> 69  | 0.58380   |          |              |
| Excited State 14: | Singlet-A | 5.9180 eV | 209.50 nm | f=0.0182 | <S**2>=0.000 |
|                   |           | 56 -> 60  | -0.10057  |          |              |
|                   |           | 57 -> 62  | 0.17209   |          |              |
|                   |           | 58 -> 68  | 0.57137   |          |              |
|                   |           | 58 -> 69  | -0.31883  |          |              |
| Excited State 15: | Singlet-A | 5.9854 eV | 207.14 nm | f=0.3450 | <S**2>=0.000 |
|                   |           | 56 -> 60  | 0.26332   |          |              |
|                   |           | 57 -> 60  | 0.58389   |          |              |
|                   |           | 57 -> 62  | -0.14658  |          |              |
|                   |           | 58 -> 68  | 0.16004   |          |              |
| Excited State 16: | Singlet-A | 6.0995 eV | 203.27 nm | f=0.0146 | <S**2>=0.000 |
|                   |           | 57 -> 61  | 0.62651   |          |              |
|                   |           | 57 -> 63  | 0.15764   |          |              |
|                   |           | 57 -> 66  | -0.12056  |          |              |
|                   |           | 58 -> 70  | 0.18022   |          |              |
|                   |           | 58 -> 71  | -0.10156  |          |              |
| Excited State 17: | Singlet-A | 6.1123 eV | 202.84 nm | f=0.5304 | <S**2>=0.000 |
|                   |           | 56 -> 60  | -0.24477  |          |              |
|                   |           | 57 -> 60  | 0.27064   |          |              |
|                   |           | 57 -> 62  | 0.54671   |          |              |
|                   |           | 58 -> 68  | -0.13627  |          |              |

Excited State 18: Singlet-A 6.1584 eV 201.33 nm f=0.0028 <S\*\*2>=0.000  
 57 -> 61 0.14126  
 58 -> 70 -0.12316  
 58 -> 71 0.66363

Excited State 19: Singlet-A 6.1835 eV 200.51 nm f=0.0046 <S\*\*2>=0.000  
 57 -> 61 -0.13097  
 58 -> 70 0.57038  
 58 -> 71 0.12969  
 58 -> 72 -0.32991

Excited State 20: Singlet-A 6.1896 eV 200.31 nm f=0.0045 <S\*\*2>=0.000  
 58 -> 70 0.30620  
 58 -> 72 0.61437

Standard orientation:

| -----  |        |        |                         |           |           |  |
|--------|--------|--------|-------------------------|-----------|-----------|--|
| Center | Atomic | Atomic | Coordinates (Angstroms) |           |           |  |
| Number | Number | Type   | X                       | Y         | Z         |  |
| -----  |        |        |                         |           |           |  |
| 1      | 6      | 0      | -1.135459               | -0.228016 | -0.061026 |  |
| 2      | 6      | 0      | -0.040185               | 0.649861  | 0.124883  |  |
| 3      | 6      | 0      | 1.254569                | 0.168681  | 0.056631  |  |
| 4      | 6      | 0      | 1.555276                | -1.182723 | -0.199396 |  |
| 5      | 6      | 0      | 0.460237                | -2.051662 | -0.385482 |  |
| 6      | 6      | 0      | -0.838276               | -1.602757 | -0.319391 |  |
| 7      | 1      | 0      | -0.177760               | 1.705531  | 0.304413  |  |
| 8      | 1      | 0      | 0.652317                | -3.101601 | -0.578298 |  |
| 9      | 1      | 0      | -1.638209               | -2.315810 | -0.451852 |  |
| 10     | 6      | 0      | 2.925275                | -1.565119 | -0.251566 |  |
| 11     | 6      | 0      | 3.917651                | -0.652470 | -0.062990 |  |
| 12     | 6      | 0      | 3.613049                | 0.731886  | 0.195745  |  |
| 13     | 8      | 0      | 2.266443                | 1.077893  | 0.243544  |  |
| 14     | 1      | 0      | 3.172393                | -2.603763 | -0.446637 |  |
| 15     | 7      | 0      | -2.426145               | 0.218586  | 0.005710  |  |
| 16     | 6      | 0      | -3.571352               | -0.651367 | -0.287618 |  |
| 17     | 1      | 0      | -4.361749               | -0.014407 | -0.691051 |  |
| 18     | 1      | 0      | -3.306458               | -1.342458 | -1.089462 |  |
| 19     | 6      | 0      | -4.096116               | -1.413374 | 0.933321  |  |
| 20     | 1      | 0      | -3.335905               | -2.081341 | 1.344707  |  |
| 21     | 1      | 0      | -4.404193               | -0.722253 | 1.722117  |  |
| 22     | 1      | 0      | -4.964549               | -2.015787 | 0.652726  |  |
| 23     | 6      | 0      | -2.749528               | 1.602749  | 0.368163  |  |
| 24     | 1      | 0      | -3.729567               | 1.587984  | 0.850063  |  |
| 25     | 1      | 0      | -2.047197               | 1.951109  | 1.127866  |  |
| 26     | 6      | 0      | -2.777310               | 2.563260  | -0.825383 |  |
| 27     | 1      | 0      | -3.048486               | 3.567879  | -0.489450 |  |

|    |   |   |           |           |           |
|----|---|---|-----------|-----------|-----------|
| 28 | 1 | 0 | -1.803624 | 2.619386  | -1.317159 |
| 29 | 1 | 0 | -3.514634 | 2.243299  | -1.566077 |
| 30 | 8 | 0 | 4.410899  | 1.634218  | 0.377850  |
| 31 | 1 | 0 | 4.964911  | -0.918457 | -0.098382 |

-----  
Rotational constants (GHZ): 1.1060997 0.2905825 0.2396559

### 13. Equilibrium Geometry in Ground State, Excitation energies and oscillator strength of imidazo fragment (B3LYP)

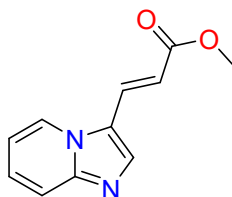

Imidazo

B3LYP

ABSOPRTION

Standard orientation:

| Center Number | Atomic Number | Atomic Type | Coordinates (Angstroms) |           |           |
|---------------|---------------|-------------|-------------------------|-----------|-----------|
|               |               |             | X                       | Y         | Z         |
| 1             | 6             | 0           | 3.980758                | 0.176590  | 0.000032  |
| 2             | 6             | 0           | 4.062846                | -1.195364 | 0.000032  |
| 3             | 6             | 0           | 2.882014                | -1.977729 | 0.000014  |
| 4             | 6             | 0           | 1.652806                | -1.380841 | -0.000002 |
| 5             | 6             | 0           | 2.716010                | 0.790382  | 0.000015  |
| 6             | 1             | 0           | 4.858829                | 0.808767  | 0.000046  |
| 7             | 1             | 0           | 5.029256                | -1.683542 | 0.000045  |
| 8             | 1             | 0           | 2.934361                | -3.058031 | 0.000015  |
| 9             | 1             | 0           | 0.732745                | -1.938832 | -0.000014 |
| 10            | 7             | 0           | 1.565486                | -0.010476 | -0.000002 |
| 11            | 7             | 0           | 2.397931                | 2.095358  | 0.000015  |
| 12            | 6             | 0           | 1.053889                | 2.133583  | -0.000013 |
| 13            | 1             | 0           | 0.509481                | 3.067786  | -0.000021 |
| 14            | 6             | 0           | 0.471534                | 0.862944  | -0.000014 |
| 15            | 6             | 0           | -0.928200               | 0.586611  | -0.000030 |
| 16            | 1             | 0           | -1.520847               | 1.496603  | -0.000037 |
| 17            | 6             | 0           | -1.614474               | -0.581104 | -0.000039 |
| 18            | 1             | 0           | -1.147329               | -1.554412 | -0.000033 |
| 19            | 6             | 0           | -3.077898               | -0.653983 | -0.000060 |
| 20            | 8             | 0           | -3.699273               | -1.705800 | -0.000016 |
| 21            | 8             | 0           | -3.689292               | 0.549934  | -0.000004 |
| 22            | 6             | 0           | -5.130567               | 0.544647  | 0.000047  |

|    |   |   |           |          |           |
|----|---|---|-----------|----------|-----------|
| 23 | 1 | 0 | -5.510512 | 0.044036 | 0.891178  |
| 24 | 1 | 0 | -5.423117 | 1.591875 | 0.000094  |
| 25 | 1 | 0 | -5.510574 | 0.044099 | -0.891093 |

-----  
Rotational constants (GHZ): 1.5654195 0.2803146 0.2381013

Excitation energies and oscillator strengths:

Excited State 1: Singlet-A 3.6384 eV 340.76 nm f=0.6873 <S\*\*2>=0.000  
53 -> 54 0.69900

This state for optimization and/or second-order correction.

Total Energy, E(TD-HF/TD-KS) = -685.201122417

Copying the excited state density for this state as the 1-particle RhoCI density.

Excited State 2: Singlet-A 3.9443 eV 314.34 nm f=0.0267 <S\*\*2>=0.000  
52 -> 54 0.27018  
53 -> 55 0.64457

Excited State 3: Singlet-A 4.6482 eV 266.74 nm f=0.0001 <S\*\*2>=0.000  
51 -> 54 0.68424  
51 -> 56 -0.10735

Excited State 4: Singlet-A 4.6790 eV 264.98 nm f=0.3301 <S\*\*2>=0.000  
52 -> 54 0.63920  
53 -> 55 -0.25919

Excited State 5: Singlet-A 5.0662 eV 244.73 nm f=0.1370 <S\*\*2>=0.000  
52 -> 55 -0.48198  
53 -> 56 0.49989

Excited State 6: Singlet-A 5.2135 eV 237.81 nm f=0.0001 <S\*\*2>=0.000  
50 -> 54 0.68910

Excited State 7: Singlet-A 5.2274 eV 237.18 nm f=0.0010 <S\*\*2>=0.000  
53 -> 57 0.68208

Excited State 8: Singlet-A 5.5356 eV 223.98 nm f=0.2040 <S\*\*2>=0.000  
49 -> 54 -0.38802  
52 -> 55 0.41116  
53 -> 56 0.40119

Excited State 9: Singlet-A 5.5672 eV 222.71 nm f=0.0009 <S\*\*2>=0.000  
53 -> 58 0.67844  
53 -> 59 -0.12009  
53 -> 60 0.10180

Excited State 10: Singlet-A 5.6753 eV 218.46 nm f=0.0062 <S\*\*2>=0.000

|                   |           |           |           |          |              |
|-------------------|-----------|-----------|-----------|----------|--------------|
|                   |           | 53 -> 58  | 0.10502   |          |              |
|                   |           | 53 -> 59  | 0.68657   |          |              |
| Excited State 11: | Singlet-A | 5.7042 eV | 217.36 nm | f=0.0004 | <S**2>=0.000 |
|                   |           | 50 -> 55  | 0.60363   |          |              |
|                   |           | 51 -> 55  | -0.35137  |          |              |
| Excited State 12: | Singlet-A | 5.8283 eV | 212.73 nm | f=0.0100 | <S**2>=0.000 |
|                   |           | 48 -> 54  | 0.57118   |          |              |
|                   |           | 49 -> 54  | -0.36324  |          |              |
|                   |           | 52 -> 55  | -0.13463  |          |              |
| Excited State 13: | Singlet-A | 5.9410 eV | 208.69 nm | f=0.0024 | <S**2>=0.000 |
|                   |           | 53 -> 57  | 0.12091   |          |              |
|                   |           | 53 -> 60  | 0.67668   |          |              |
| Excited State 14: | Singlet-A | 6.0028 eV | 206.54 nm | f=0.0000 | <S**2>=0.000 |
|                   |           | 50 -> 55  | 0.35123   |          |              |
|                   |           | 51 -> 55  | 0.60473   |          |              |
| Excited State 15: | Singlet-A | 6.1239 eV | 202.46 nm | f=0.1697 | <S**2>=0.000 |
|                   |           | 48 -> 54  | 0.36924   |          |              |
|                   |           | 49 -> 54  | 0.40474   |          |              |
|                   |           | 52 -> 55  | 0.21413   |          |              |
|                   |           | 52 -> 56  | 0.16368   |          |              |
|                   |           | 53 -> 56  | 0.19734   |          |              |
|                   |           | 53 -> 63  | -0.10855  |          |              |
|                   |           | 53 -> 65  | 0.17915   |          |              |
| Excited State 16: | Singlet-A | 6.1652 eV | 201.10 nm | f=0.0010 | <S**2>=0.000 |
|                   |           | 53 -> 61  | 0.67692   |          |              |
|                   |           | 53 -> 64  | 0.15342   |          |              |
| Excited State 17: | Singlet-A | 6.2067 eV | 199.76 nm | f=0.0047 | <S**2>=0.000 |
|                   |           | 48 -> 55  | 0.11054   |          |              |
|                   |           | 49 -> 55  | 0.52314   |          |              |
|                   |           | 52 -> 56  | 0.43980   |          |              |
| Excited State 18: | Singlet-A | 6.3439 eV | 195.44 nm | f=0.0060 | <S**2>=0.000 |
|                   |           | 52 -> 57  | 0.60775   |          |              |
|                   |           | 52 -> 58  | 0.20696   |          |              |
|                   |           | 53 -> 62  | -0.25394  |          |              |
| Excited State 19: | Singlet-A | 6.3882 eV | 194.08 nm | f=0.0001 | <S**2>=0.000 |
|                   |           | 52 -> 57  | 0.15897   |          |              |
|                   |           | 53 -> 62  | 0.53833   |          |              |
|                   |           | 53 -> 64  | -0.40002  |          |              |

Excited State 20: Singlet-A 6.4025 eV 193.65 nm f=0.0019 <S\*\*2>=0.000  
 53 -> 63 0.62761  
 53 -> 67 -0.29728

#### 14. Equilibrium Geometry in Ground State and Dihedral angles of compound 4a

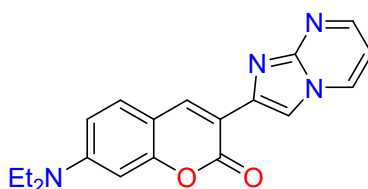

4a

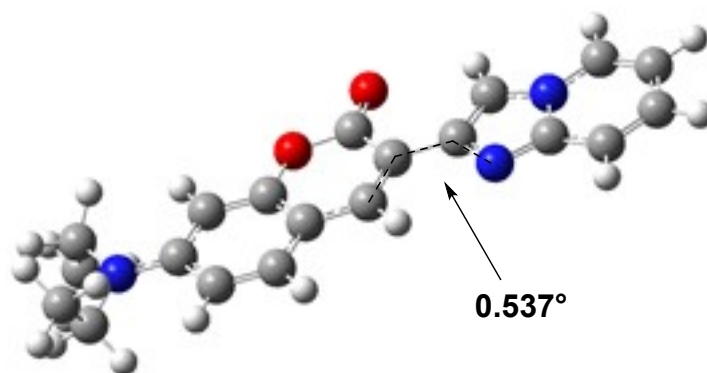

Standard orientation:

| Center Number | Atomic Number | Atomic Type | Coordinates (Angstroms) |           |           |
|---------------|---------------|-------------|-------------------------|-----------|-----------|
|               |               |             | X                       | Y         | Z         |
| 1             | 6             | 0           | 3.740944                | -0.315076 | 0.045668  |
| 2             | 6             | 0           | 2.851468                | 0.766559  | -0.099312 |
| 3             | 6             | 0           | 1.491022                | 0.543357  | -0.076026 |
| 4             | 6             | 0           | 0.926653                | -0.722617 | 0.091625  |
| 5             | 6             | 0           | 1.819570                | -1.798305 | 0.237187  |
| 6             | 6             | 0           | 3.176096                | -1.612291 | 0.214872  |
| 7             | 1             | 0           | 3.196482                | 1.782854  | -0.210486 |
| 8             | 1             | 0           | 1.418796                | -2.797682 | 0.362100  |
| 9             | 1             | 0           | 3.818071                | -2.474413 | 0.311164  |
| 10            | 6             | 0           | -0.487771               | -0.829106 | 0.103495  |
| 11            | 6             | 0           | -1.295159               | 0.255570  | -0.038531 |
| 12            | 6             | 0           | -0.691950               | 1.566656  | -0.207903 |
| 13            | 8             | 0           | 0.679408                | 1.632157  | -0.216894 |
| 14            | 1             | 0           | -0.944557               | -1.803531 | 0.230652  |
| 15            | 6             | 0           | -3.708580               | 1.111227  | -0.140156 |

|    |   |   |           |           |           |
|----|---|---|-----------|-----------|-----------|
| 16 | 1 | 0 | -3.631890 | 2.174385  | -0.267940 |
| 17 | 6 | 0 | -4.642046 | -0.890921 | 0.102121  |
| 18 | 7 | 0 | -3.337984 | -1.103576 | 0.126392  |
| 19 | 6 | 0 | -2.753926 | 0.127695  | -0.022724 |
| 20 | 7 | 0 | -4.918979 | 0.461073  | -0.060355 |
| 21 | 6 | 0 | -5.729119 | -1.790122 | 0.211223  |
| 22 | 6 | 0 | -7.000577 | -1.305611 | 0.154069  |
| 23 | 1 | 0 | -7.842775 | -1.980674 | 0.235992  |
| 24 | 6 | 0 | -7.238972 | 0.087606  | -0.013386 |
| 25 | 1 | 0 | -8.248448 | 0.471442  | -0.058542 |
| 26 | 6 | 0 | -6.198925 | 0.949304  | -0.118028 |
| 27 | 1 | 0 | -6.301855 | 2.017289  | -0.246290 |
| 28 | 1 | 0 | -5.517767 | -2.843316 | 0.337636  |
| 29 | 7 | 0 | 5.090699  | -0.131927 | 0.022857  |
| 30 | 6 | 0 | 6.027454  | -1.218959 | 0.292482  |
| 31 | 1 | 0 | 6.920834  | -0.770655 | 0.730736  |
| 32 | 1 | 0 | 5.615636  | -1.873142 | 1.061717  |
| 33 | 6 | 0 | 6.409705  | -2.017304 | -0.949455 |
| 34 | 1 | 0 | 5.538406  | -2.498039 | -1.397616 |
| 35 | 1 | 0 | 6.863701  | -1.369485 | -1.702314 |
| 36 | 1 | 0 | 7.132748  | -2.793774 | -0.690256 |
| 37 | 6 | 0 | 5.684755  | 1.170471  | -0.260766 |
| 38 | 1 | 0 | 6.654692  | 0.987500  | -0.726526 |
| 39 | 1 | 0 | 5.085348  | 1.685924  | -1.012471 |
| 40 | 6 | 0 | 5.864264  | 2.041835  | 0.978301  |
| 41 | 1 | 0 | 6.330274  | 2.991476  | 0.706595  |
| 42 | 1 | 0 | 4.907176  | 2.256299  | 1.456794  |
| 43 | 1 | 0 | 6.505837  | 1.547143  | 1.710565  |
| 44 | 8 | 0 | -1.280195 | 2.616793  | -0.343393 |

-----  
Rotational constants (GHZ): 0.7725879 0.0793274 0.0728829

### Mulliken and Hirshfeld charges for the coumarin and imidazo[1,2-a]pyridine moieties

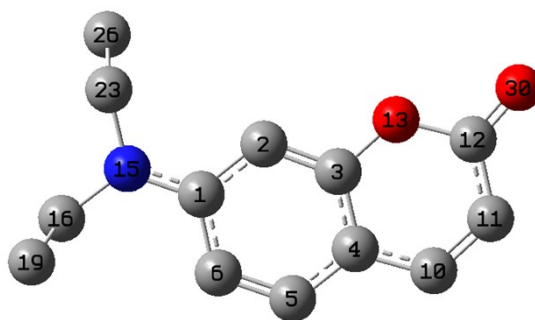

Coumarin moiety



| Number | Atom | Charge*   |           |
|--------|------|-----------|-----------|
|        |      | Mulliken  | Hirshfeld |
| 1      | C    | -0.014534 | 0.066341  |
| 2      | C    | -0.347231 | -0.033362 |
| 3      | C    | -1.495054 | 0.079459  |
| 4      | C    | 1.512279  | -0.042438 |
| 5      | C    | 0.203971  | 0.024677  |
| 6      | C    | 0.006306  | -0.018571 |
| 10     | C    | -0.005721 | 0.063879  |
| 11     | C    | 0.156157  | -0.020614 |
| 12     | C    | 0.16769   | 0.184711  |
| 13     | O    | -0.160629 | -0.12186  |
| 15     | N    | 0.238834  | -0.070163 |
| 16     | C    | 0.070358  | 0.107409  |
| 19     | C    | -0.007207 | 0.022907  |
| 23     | C    | 0.087413  | 0.107233  |
| 26     | C    | -0.011412 | 0.023069  |
| 30     | O    | -0.401219 | -0.372356 |

\*Hydrogens charges summed into heavy atoms

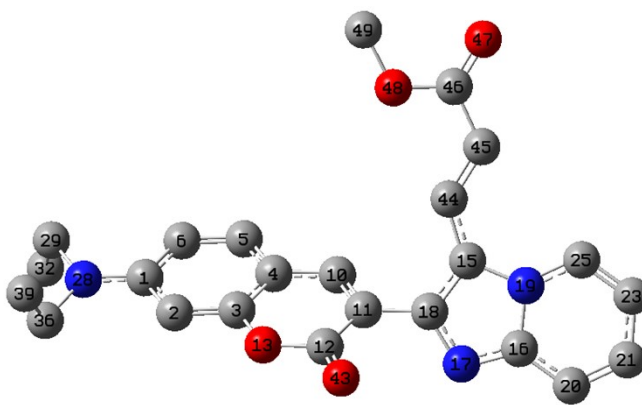

|    |   | 7a        |           | 7a'       |           |
|----|---|-----------|-----------|-----------|-----------|
|    |   | Charge*   |           | Charge*   |           |
|    |   | Mulliken  | Hirshfeld | Mulliken  | Hirshfeld |
| 1  | C | -0.174924 | 0.069881  | 0.014796  | 0.069088  |
| 2  | C | -0.487775 | -0.029374 | -0.392624 | -0.03     |
| 3  | C | -1.043379 | 0.08248   | -1.000349 | 0.08181   |
| 4  | C | 0.908072  | -0.040431 | 0.725183  | -0.040741 |
| 5  | C | -0.088182 | 0.030438  | 0.037988  | 0.029593  |
| 6  | C | 0.167453  | -0.013922 | 0.117326  | -0.015042 |
| 10 | C | 0.414935  | 0.057506  | 0.206209  | 0.062593  |

|    |   |           |           |           |           |
|----|---|-----------|-----------|-----------|-----------|
| 11 | C | 0.63653   | -0.038746 | 0.212857  | -0.035184 |
| 12 | C | -0.201706 | 0.193732  | 0.18416   | 0.190963  |
| 13 | O | -0.122641 | -0.11682  | -0.147803 | -0.118446 |
| 15 | C | 0.047747  | 0.014117  | 0.189537  | 0.016497  |
| 16 | C | 0.379125  | 0.100394  | 0.544243  | 0.100456  |
| 17 | N | -0.037396 | -0.252668 | -0.048593 | -0.256217 |
| 18 | C | -0.12706  | 0.044478  | -0.125209 | 0.0442    |
| 19 | N | 0.237738  | -0.002802 | 0.24777   | -0.002864 |
| 20 | C | 0.101523  | 0.026456  | -0.02953  | 0.027236  |
| 21 | C | -0.394565 | 0.037992  | -0.345713 | 0.039083  |
| 23 | C | 0.062369  | 0.023529  | 0.001833  | 0.024274  |
| 25 | C | 0.004743  | 0.107857  | 0.016487  | 0.108161  |
| 28 | N | 0.248835  | -0.066262 | 0.247505  | -0.067192 |
| 29 | C | 0.081937  | 0.110137  | 0.085623  | 0.109515  |
| 32 | C | -0.000301 | 0.02543   | -0.002232 | 0.024834  |
| 36 | C | 0.080079  | 0.10996   | 0.084605  | 0.109419  |
| 39 | C | -0.004009 | 0.025776  | -0.003341 | 0.025022  |
| 43 | O | -0.375488 | -0.339651 | -0.36087  | -0.35796  |
| 44 | C | 0.070057  | 0.012359  | -0.27982  | 0.023446  |
| 45 | C | -0.107701 | -0.038254 | 0.103909  | -0.033608 |
| 46 | C | -0.046217 | 0.199018  | -0.055513 | 0.199992  |
| 47 | O | -0.358131 | -0.347282 | -0.352068 | -0.345343 |
| 48 | O | -0.136235 | -0.133012 | -0.140274 | -0.13273  |
| 49 | C | 0.264567  | 0.147413  | 0.263904  | 0.149186  |

\*Hydrogens charges summed into heavy atoms

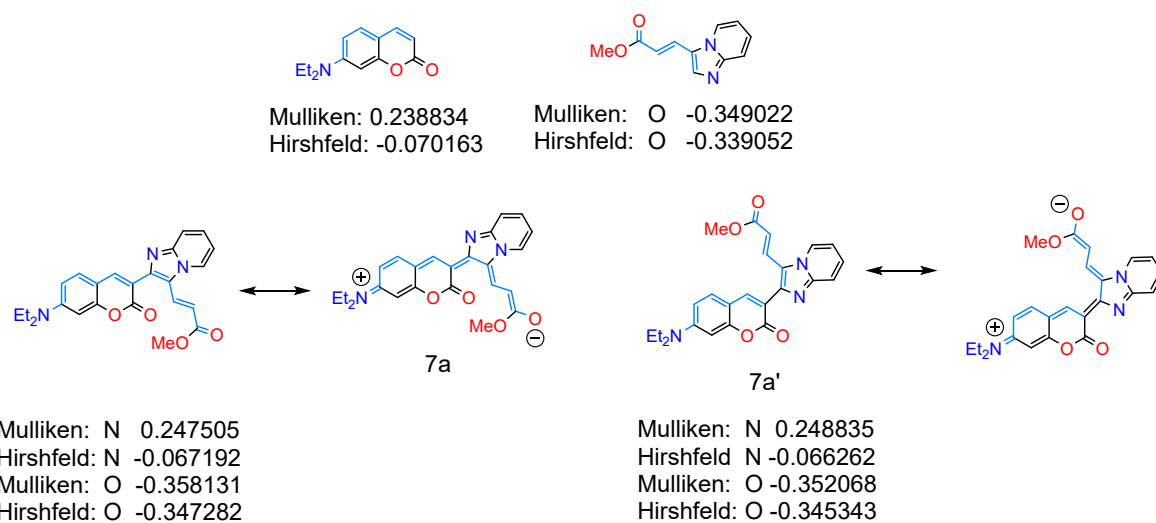

**Scheme S1.** Resonances structures of the ICT, The N charges refers to Nitrogen in diethylamino in coumarin and the O charges refers to carbonylic oxygen in acrylate.

- [1] S. García, J.L. Vázquez, M. Rentería, I.G. Aguilar-Gardu, F. Delgado, M. Trejo-Durán, M.A. García-Revilla, E. Alvarado-M, M.Á. Vázquez, Synthesis and experimental-computational characterization of nonlinear optical properties of triazacyclopentafluorene-coumarin derivatives, *Opt. Mater. (Amst)*. 62 (2016) 231–239. <https://doi.org/10.1016/j.optmat.2016.09.065>.
- [2] B. Aydiner, Z. Seferoğlu, Proton Sensitive Functional Organic Fluorescent Dyes Based on Coumarin-imidazo [1,2-a] pyrimidine; Syntheses, Photophysical Properties, and Investigation of Protonation Ability, *Eur. J. Org. Chem.* 2018 (2018) 5921–5934. <https://doi.org/10.1002/ejoc.201800594>.
- [3] O. Meth-Cohn, S.P. Stanforth, The Vilsmeier-Haack Reaction, in: B.M. Trost, I. Fleming (Eds.), *Compr. Org. Synth.*, Elsevier Ltd., Berkeley, 1991: pp. 777–794.
- [4] C. Lee, W. Yang, R.G. Parr, Development of the Colic-Salvetti correlation-energy formula into a functional of the electron density, *EE Eval. Eng.* 50 (2011) 36–39. <https://doi.org/10.1103/PhysRevB.37.785>.
- [5] A.D. Becke, Density-functional thermochemistry. III. The role of exact exchange, *J. Chem. Phys.* 98 (1993) 5648–5652. <https://doi.org/10.1063/1.464913>.
- [6] T. Yanai, D.P. Tew, N.C. Handy, A new hybrid exchange-correlation functional using the Coulomb-attenuating method (CAM-B3LYP), *Chem. Phys. Lett.* 393 (2004) 51–57. <https://doi.org/10.1016/j.cplett.2004.06.011>.
- [7] J.P. Perdew, K. Burke, M. Ernzerhof, Generalized gradient approximation made simple, *Phys. Rev. Lett.* 77 (1996) 3865–3868. <https://doi.org/10.1103/PhysRevLett.77.3865>.
- [8] M. Walker, A.J.A. Harvey, A. Sen, C.E.H. Dessent, Performance of M06, M06-2X, and M06-HF density functionals for conformationally flexible anionic clusters: M06 functionals perform better than B3LYP for a model system with dispersion and ionic hydrogen-bonding interactions, *J. Phys. Chem. A*. 117 (2013) 12590–12600. <https://doi.org/10.1021/jp408166m>.
- [9] T. Clark, J. Chandrasekhar, G.W. Spitznagel, P.V.R. Schleyer, Efficient diffuse function-augmented basis sets for anion calculations. III. The 3-21+G basis set for first-row elements, Li–F, *J. Comput. Chem.* 4 (1983) 294–301. <https://doi.org/10.1002/jcc.540040303>.
- [10] J. Tomasi, B. Mennucci, R. Cammi, Quantum mechanical continuum solvation models, *Chem. Rev.* 105 (2005) 2999–3093. <https://doi.org/10.1021/cr9904009>.
- [11] R. Cammi, B. Mennucci, J. Tomasi, Fast evaluation of geometries and properties of excited molecules in solution: A Tamm-Dancoff model with application to 4-dimethylaminobenzonitrile, *J. Phys. Chem. A*. 104 (2000) 5631–5637. <https://doi.org/10.1021/jp000156l>.
- [12] C. Adamo, D. Jacquemin, The calculations of excited-state properties with time-dependent density functional theory, *Chem. Soc. Rev.* 42 (2013) 845–856. <https://doi.org/10.1039/c2cs35394f>.
- [13] M.J. Frisch, G.W. Trucks, H.B. Schlegel, G.E. Scuseria, M.A. Robb, J.R. Cheeseman, G. Scalmani, V. Barone, G. A. Petersson, H. Nakatsuji, X. Li, M. Caricato, A. Marenich, J. Bloino, B.G. Janesko, R. Gomperts, B. Mennucci, H.P. Hratchian, J. V. Ortiz, A.F. Izmaylov, J.L. Sonnenberg, D. Williams-Young, F. Ding, F. Lipparini, F. Egidi, J. Goings,

B. Peng, A. Petrone, T. Henderson, D. Ranasinghe, V.G. Zakrzewski, J. Gao, N. Rega, G. Zheng, W. Liang, M. Hada, M. Ehara, K. Toyota, R. Fukuda, J. Hasegawa, M. Ishida, T. Nakajima, Y. Honda, O. Kitao, H. Nakai, T. Vreven, K. Throssell, J.A. Montgomery, J.E. Peralta, F. Ogliaro, M. Bearpark, J.J. Heyd, E. Brothers, K.N. Kudin, V.N. Staroverov, T. Keith, R. Kobayashi, J. Normand, K. Raghavachari, A. Rendell, J.C. Burant, S.S. Iyengar, J. Tomasi, M. Cossi, J.M. Millam, M. Klene, C. Adamo, R. Cammi, J.W. Ochterski, R.L. Martin, K. Morokuma, O. Farkas, J.B. Foresman, D.J. Fox, Gaussian 09, Revis. B.01, (2009).
